# Supplementary material for: Fenugreek seed ethanolic extract inhibited formation of advanced glycation end products via scavenging reactive carbonyl intermediates
Source: PubMed Central journal article supplement — Heliyon. 2023 Jun 1;9(6):e16866. doi: 10.1016/j.heliyon.2023.e16866 (PMC10360956; doi:10.1016/j.heliyon.2023.e16866), 2023-06-01
Supplement: mmc1.pdf [file mmc1.pdf]

## Triple Quadrupole Acquisition Method - MS Parameters Report

|                              |                                                                     |
|------------------------------|---------------------------------------------------------------------|
| Method file                  | D:\MassHunter\GCMS\2\methods\SAIRA-ASGHAR-040123.M\qqqacqmethod.xml |
| Tune file                    | AUTOTUNE-02-01-23.ei.tune.xml                                       |
| Ion source                   | EI                                                                  |
| Source temp. (C)             | 250                                                                 |
| Electron energy mode         | Use tune setting                                                    |
| Fixed Electron energy (eV)   |                                                                     |
| Stop mode                    | By Chromatograph Time                                               |
| Stop time (min)              | 1                                                                   |
| Solvent delay (min)          | 5                                                                   |
| Time filter enabled          | Yes                                                                 |
| Time filter peak width (sec) | 0.7                                                                 |
| Use gain                     | Yes                                                                 |
| EM Saver                     |                                                                     |
| Auto baseline subtract       | Yes                                                                 |

### Time Segments:

| Index | Start Time (min) | Scan Type | Electron Energy (eV) | Data Stored | Delta EMV (V) | Gain |
|-------|------------------|-----------|----------------------|-------------|---------------|------|
| 1     | 5.00             | MS1 Scan  |                      | X           |               | 1    |

### Time Events:

#### Time Segment 1: MS1 Scan

|                 |            |          |                |
|-----------------|------------|----------|----------------|
| Step size (amu) | 0.1        |          |                |
| Threshold       | 100        |          |                |
| Profile data    | No         |          |                |
| Segment name    | Start mass | End mass | Scan time (ms) |
|                 | 40         | 700      | 200            |

Adminis

:20 PM

INSTRUMENT CONTROL PARAMETERS: GCMS TQQQ

D:\MassHunter\GCMS\2\methods\SAIRA-ASGHAR-040123.M  
 Mon Jan 09 09:44:49 2023

Control Information

Sample Inlet : GC  
 Injection Source : PAL Sampler  
 Mass Spectrometer : Enabled

Injection Volume: 2 µl  
 Overlap Injection Mode: No Overlap

PAL Method Information

Syringe: 10ul  
 Cycle: MACRO GC\_Liq4-V2

Parameters of PAL Cycle

|                                  |         |
|----------------------------------|---------|
| Air Volume (µl):                 | 0       |
| Pre Clean with Solvent 1 :       | 2       |
| Pre Clean with Solvent 2 :       | 0       |
| % Syringe Fill for Cleaning (%): | 40      |
| Pre Clean with Sample :          | 0       |
| Sample Amount for Cleaning (µl): | 0       |
| Filling Speed (µl/s):            | 2       |
| Filling Strokes :                | 1       |
| Inject to:                       | GC Inj1 |
| Injection Speed (µl/s):          | 50      |
| Pre Inject Delay (ms):           | 500     |
| Post Inject Delay (ms):          | 500     |
| Post Clean with Solvent 1 :      | 2       |
| Post Clean with Solvent 2 :      | 0       |

No Sample Prep method has been assigned to this method.

|                                        |               |
|----------------------------------------|---------------|
| Oven                                   |               |
| Equilibration Time                     | 0.5 min       |
| Max Temperature                        | 325 degrees C |
| Slow Fan                               | Disabled      |
| Oven Program                           | On            |
| 50 °C for 5 min                        |               |
| #1 then 7 °C/min to 200 °C for 20 min  |               |
| #2 then 10 °C/min to 300 °C for 15 min |               |
| Run Time                               | 71.429 min    |

QQQ Collision Cell EPC

|                  |     |
|------------------|-----|
| He Quench Gas    | Off |
| N2 Collision Gas | Off |

Adminis

:50 AM

Sample Overlap  
Sample overlap is not enabled

|                   |                          |
|-------------------|--------------------------|
| Front SS Inlet He |                          |
| Mode              | Split                    |
| Heater            | On 250 °C                |
| Pressure          | On 1.9952 psi            |
| Total Flow        | On 19.5 mL/min           |
| Septum Purge Flow | On 3 mL/min              |
| Gas Saver         | On 20 mL/min After 2 min |
| Split Ratio       | 10 :1                    |
| Split Flow        | 15 mL/min                |

|                                   |            |
|-----------------------------------|------------|
| Thermal Aux 2 (MSD Transfer Line) |            |
| Heater                            | On         |
| Temperature Program               | On         |
| 260 °C for 0 min                  |            |
| Run Time                          | 71.429 min |

Column #1  
ZEBRONZEBRON-5MS  
325 °C: 30 m x 320 µm x 0.25 µm  
In: Front SS Inlet He  
Out: Vacuum

|                      |               |
|----------------------|---------------|
| (Initial)            | 50 °C         |
| Pressure             | 1.9952 psi    |
| Flow                 | 1.5 mL/min    |
| Average Velocity     | 44.635 cm/sec |
| Holdup Time          | 1.1202 min    |
| Flow Program         | On            |
| 1.5 mL/min for 0 min |               |
| Run Time             | 71.429 min    |

|                      |                   |
|----------------------|-------------------|
| Signals              |                   |
| Signal #1: Test Plot | Save Off<br>50 Hz |
| Signal #2: Test Plot | Save Off<br>50 Hz |
| Signal #3: Test Plot | Save Off<br>50 Hz |
| Signal #4: Test Plot | Save Off<br>50 Hz |

END OF INSTRUMENT CONTROL PARAMETERS  
-----

Adminis

:39 AM
