# Supplementary material for: Fenugreek seed ethanolic extract inhibited formation of advanced glycation end products via scavenging reactive carbonyl intermediates
Source: PubMed Central journal article supplement — Heliyon. 2023 Jun 1;9(6):e16866. doi: 10.1016/j.heliyon.2023.e16866 (PMC10360956; doi:10.1016/j.heliyon.2023.e16866), 2023-06-01
Supplement: mmc2.pdf [file mmc2.pdf]

| Sample Name      | Inj Vol | Position | InjPosition | ACQ Method           | Instrument Name | User Name            | IRM Calibration Status | Acquired Time       |
|------------------|---------|----------|-------------|----------------------|-----------------|----------------------|------------------------|---------------------|
| SAIRA-01-040123- | 2       | 13       |             | SAIRA-ASGHAR-040123. | GCMS TQ00       | HEJ-G-104-03\Adminis | Not Applicable         | 1/4/2023 4:25:32 PM |

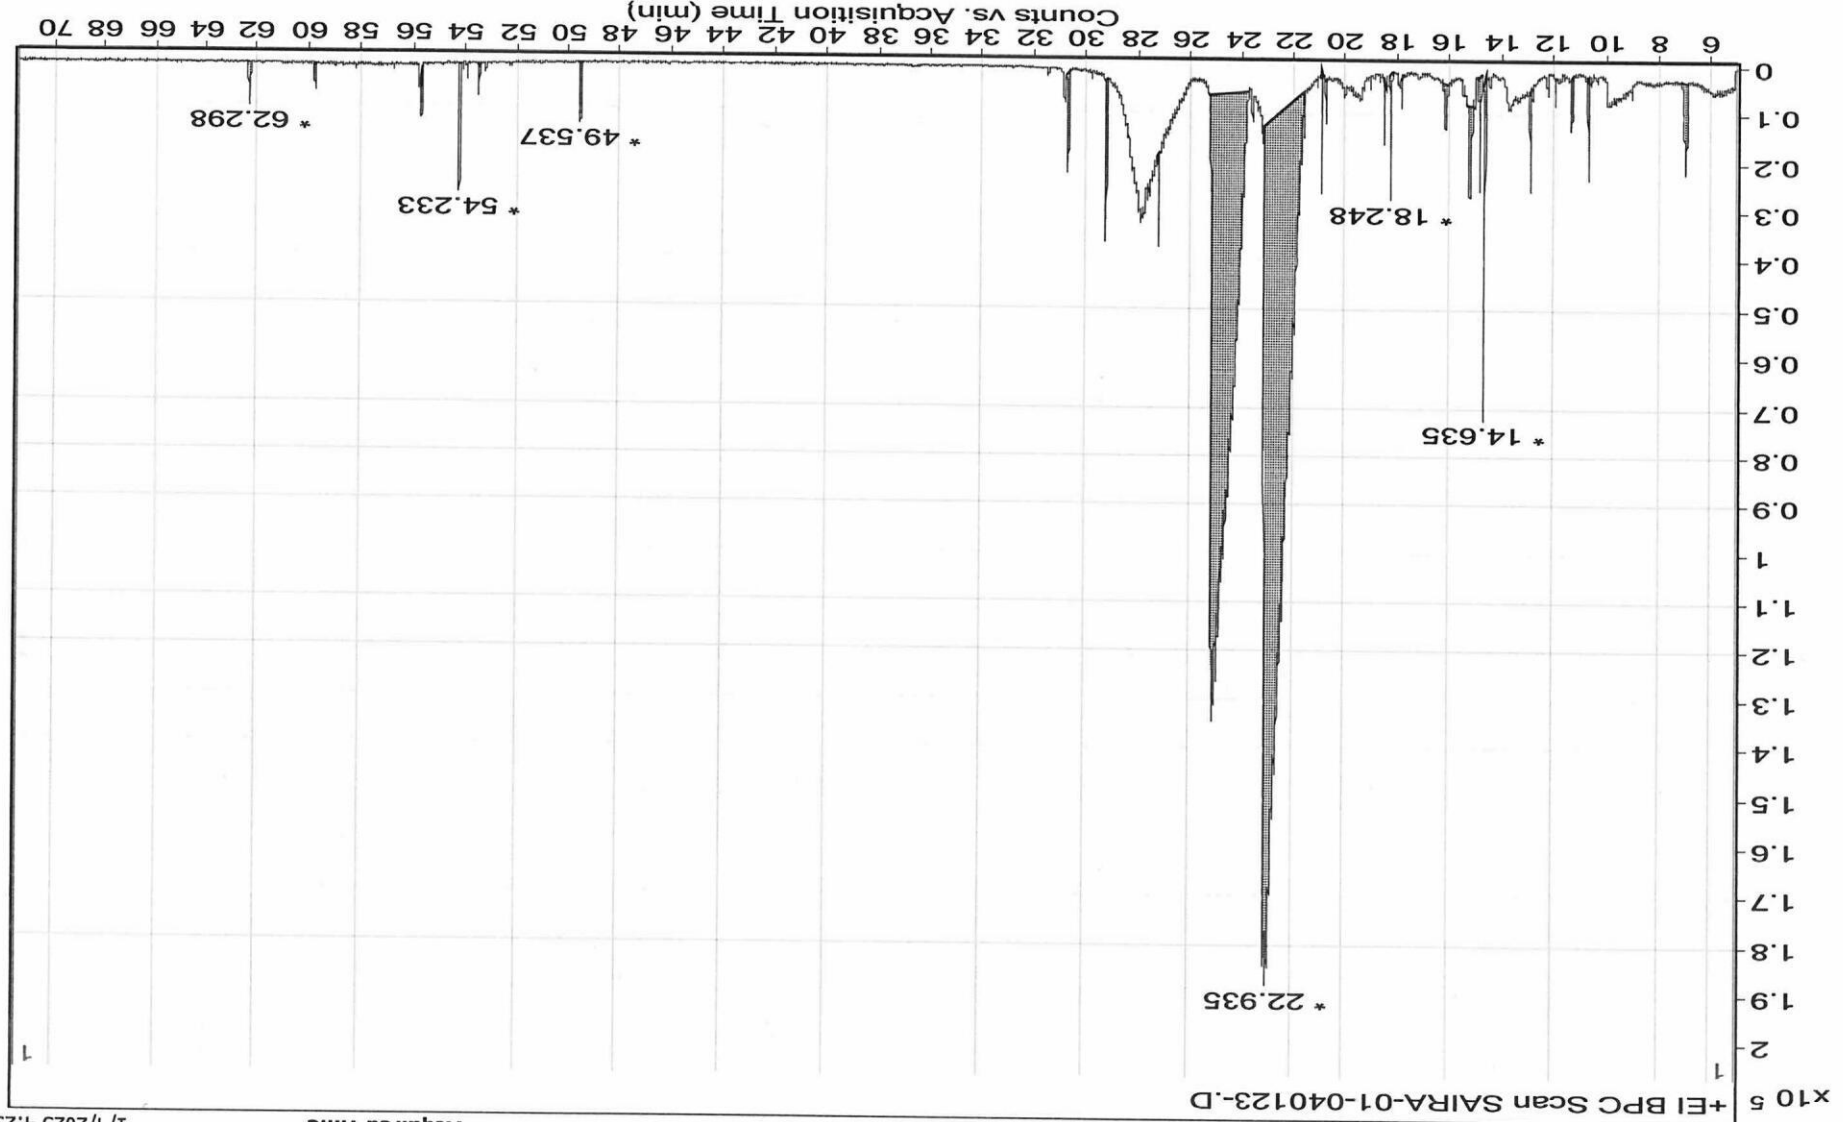

1







SAIRA-01

| Peak Number | RT     | Area    | Area % | Height | Width | Area Sum % | Height % |
|-------------|--------|---------|--------|--------|-------|------------|----------|
| 1           | 6.959  | 130098  | 1.58   | 19044  | 0.246 | 0.83       | 10.79    |
| 2           | 10.665 | 42161   | 0.51   | 20527  | 0.089 | 0.27       | 11.63    |
| 3           | 11.303 | 39765   | 0.48   | 10952  | 0.146 | 0.25       | 6.2      |
| 4           | 11.93  | 10383   | 0.13   | 5916   | 0.068 | 0.07       | 3.35     |
| 5           | 12.885 | 43214   | 0.52   | 20705  | 0.071 | 0.28       | 11.73    |
| 6           | 14.635 | 159950  | 1.94   | 69644  | 0.107 | 1.02       | 39.44    |
| 7           | 14.817 | 80443   | 0.98   | 23984  | 0.175 | 0.51       | 13.58    |
| 8           | 15.209 | 107465  | 1.3    | 18806  | 0.228 | 0.68       | 10.65    |
| 9           | 16.146 | 55385   | 0.67   | 9428   | 0.249 | 0.35       | 5.34     |
| 10          | 17.817 | 19076   | 0.23   | 6419   | 0.1   | 0.12       | 3.64     |
| 11          | 18.248 | 73429   | 0.89   | 26145  | 0.128 | 0.47       | 14.81    |
| 12          | 18.498 | 33245   | 0.4    | 12525  | 0.086 | 0.21       | 7.09     |
| 13          | 20.743 | 14153   | 0.17   | 9234   | 0.078 | 0.09       | 5.23     |
| 14          | 20.889 | 46916   | 0.57   | 24817  | 0.071 | 0.3        | 14.05    |
| 15          | 22.935 | 8246571 | 100    | 176571 | 1.55  | 52.53      | 100      |
| 16          | 25.048 | 6154454 | 74.63  | 128610 | 1.568 | 39.2       | 72.84    |
| 17          | 27.204 | 46824   | 0.57   | 19009  | 0.118 | 0.3        | 10.77    |
| 18          | 29.235 | 113918  | 1.38   | 33427  | 0.139 | 0.73       | 18.93    |
| 19          | 30.678 | 87101   | 1.06   | 20565  | 0.171 | 0.55       | 11.65    |
| 20          | 49.537 | 50210   | 0.61   | 12450  | 0.192 | 0.32       | 7.05     |
| 21          | 53.482 | 11350   | 0.14   | 6057   | 0.078 | 0.07       | 3.43     |
| 22          | 54.233 | 60813   | 0.74   | 26269  | 0.096 | 0.39       | 14.88    |
| 23          | 55.68  | 18073   | 0.22   | 9394   | 0.061 | 0.12       | 5.32     |
| 24          | 59.757 | 16288   | 0.2    | 5291   | 0.135 | 0.1        | 3        |
| 25          | 62.298 | 38028   | 0.46   | 8748   | 0.196 | 0.24       | 4.95     |

100



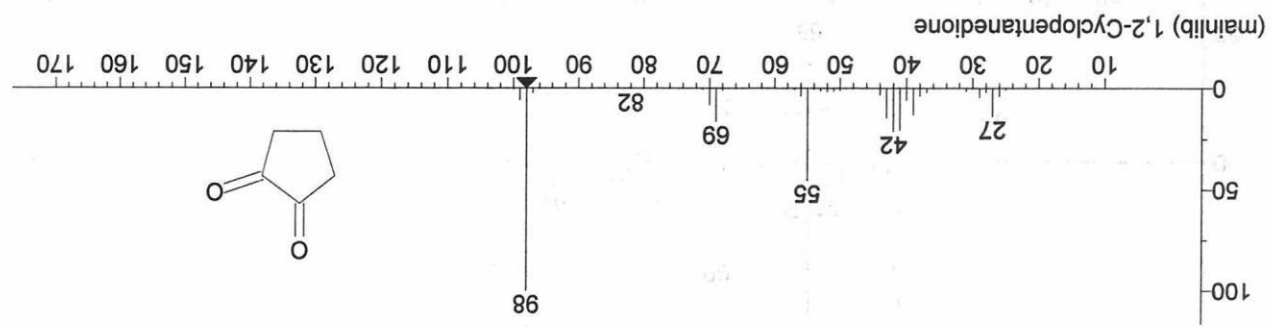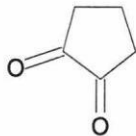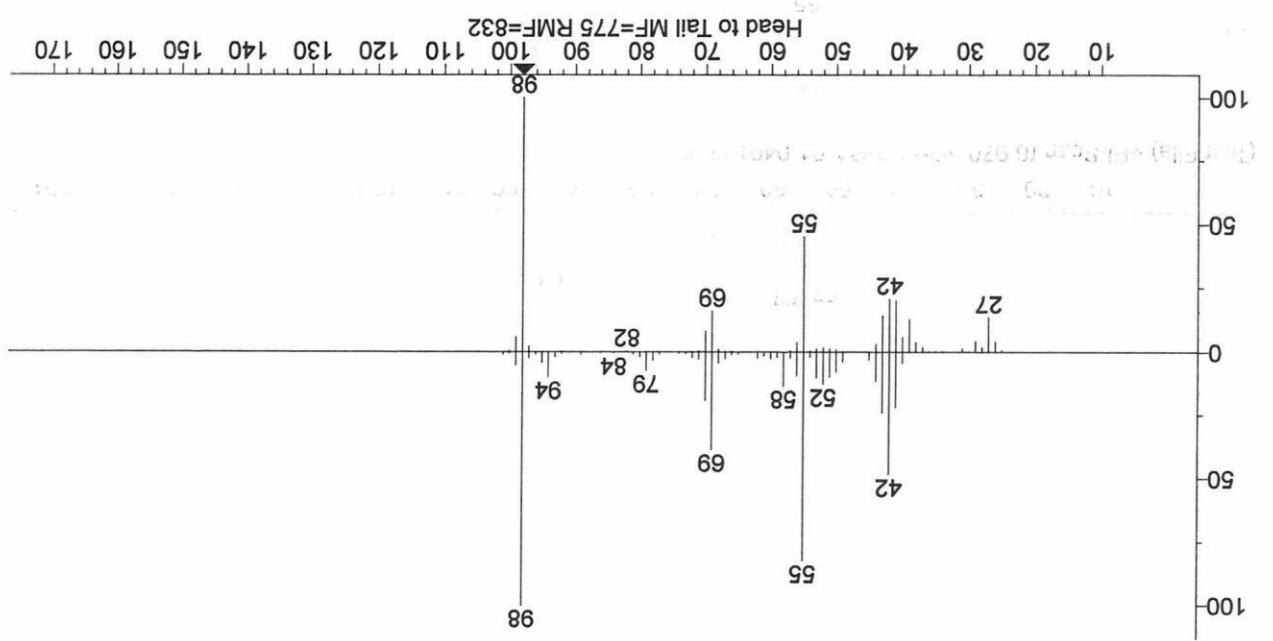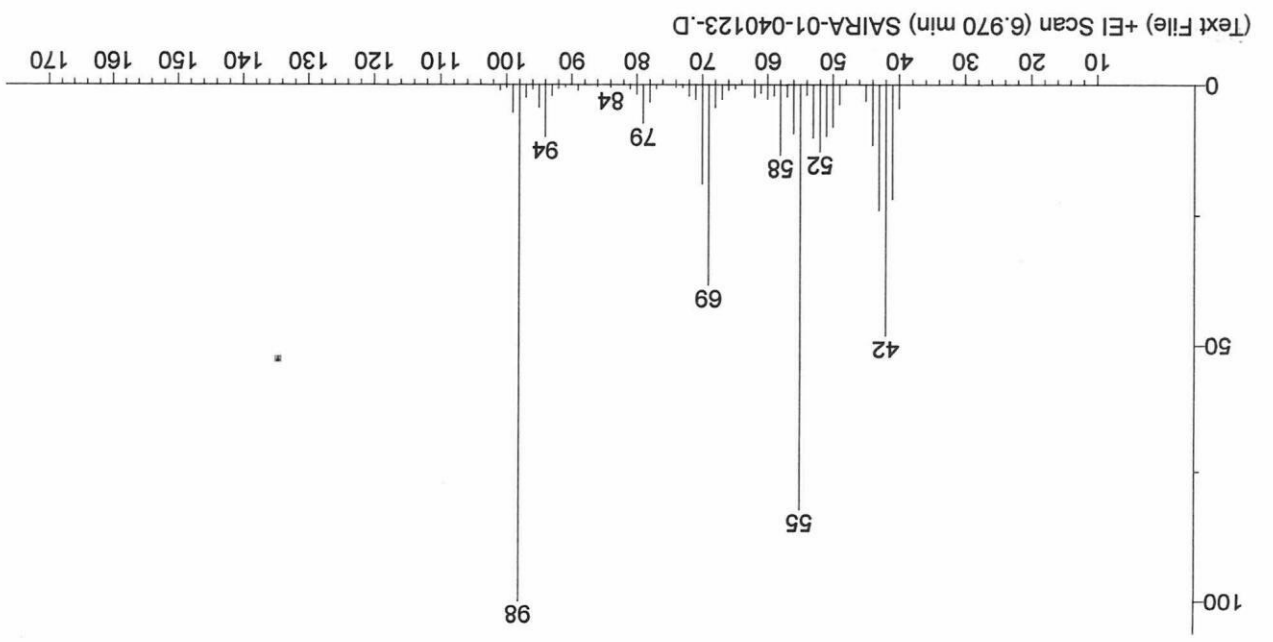

Name: 1,2-Cyclopentanedione

Formula: C<sub>5</sub>H<sub>6</sub>O<sub>2</sub>

MW: 98 CAS#: 3008-40-0 NIST#: 162182 ID#: 60722 DB: mainlib

Other DBs: HODOC

Contributor: Chemical Concepts

10 largest peaks:

98 999 | 55 452 | 42 209 | 41 203 | 69 161 | 43 142 | 27 136 | 39 128 | 70 82 | 40 57 |

Synonyms:

no synonyms.

Estimated non-polar retention index (n-alkane scale):

Value: 942 iu

Confidence interval (Ketones): 57(50%) 246(95%) iu

Retention index.

1. Value: 1741.6 iu

Column Type: Packed

Column Class: Standard polar

Active Phase: Carbowax 20M

-TPA

Column Length: 6 ft

Carrier Gas: He

Substrate: Gas Chrom P (60-80 mesh)

Data Type: Normal alkane

RI

Program Type: Ramp

Start T: 70 C

End T: 180 C

Heat Rate: 5 K/min

Source: Fiddler, W.; Doerr, R.C.;

Wasserman, A.E., Composition of an ether-soluble fraction of a liquid smoke solution, J. Agric. Food Chem., 18(2), 1970, 310-312.



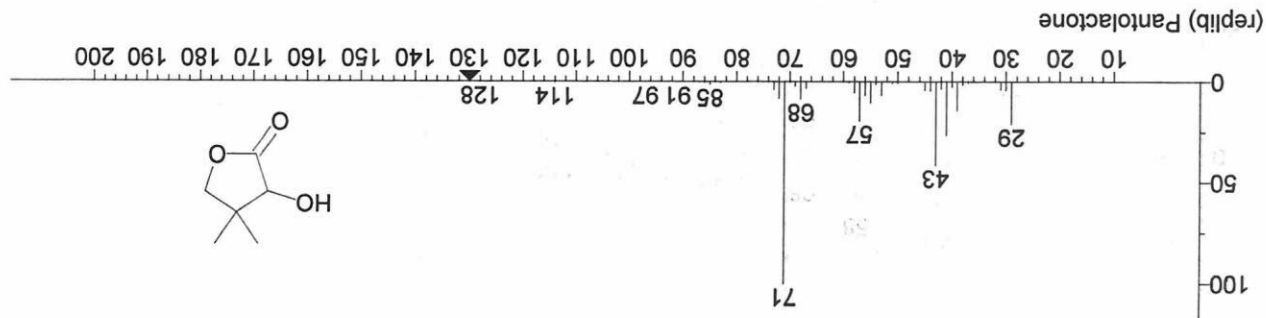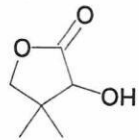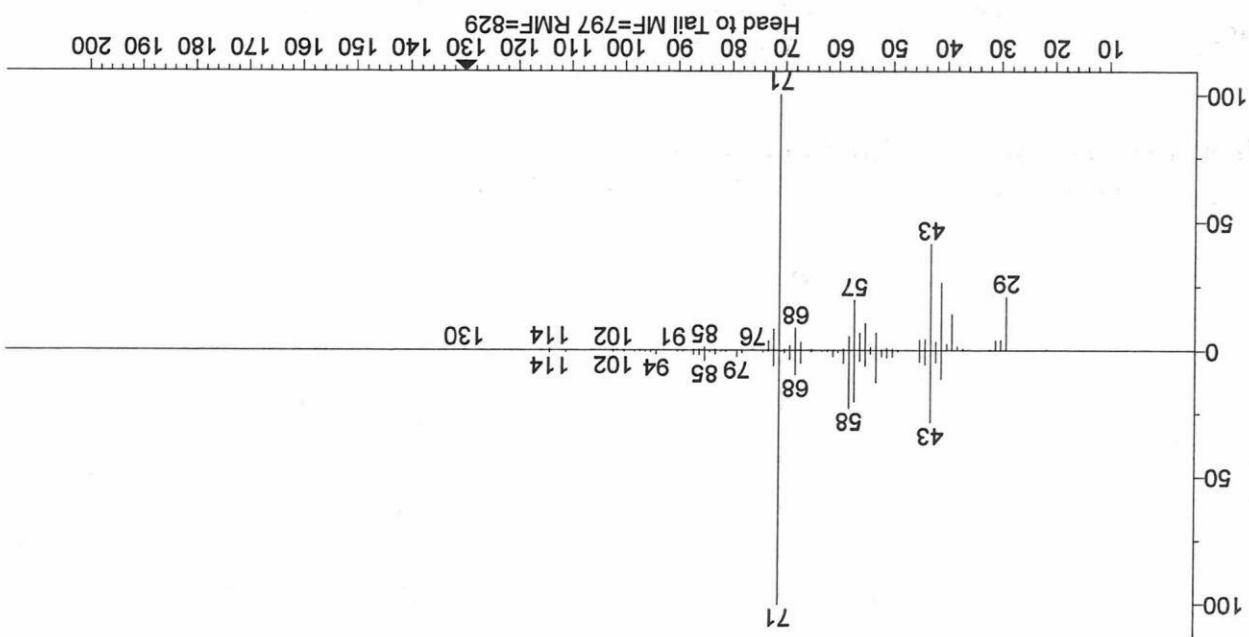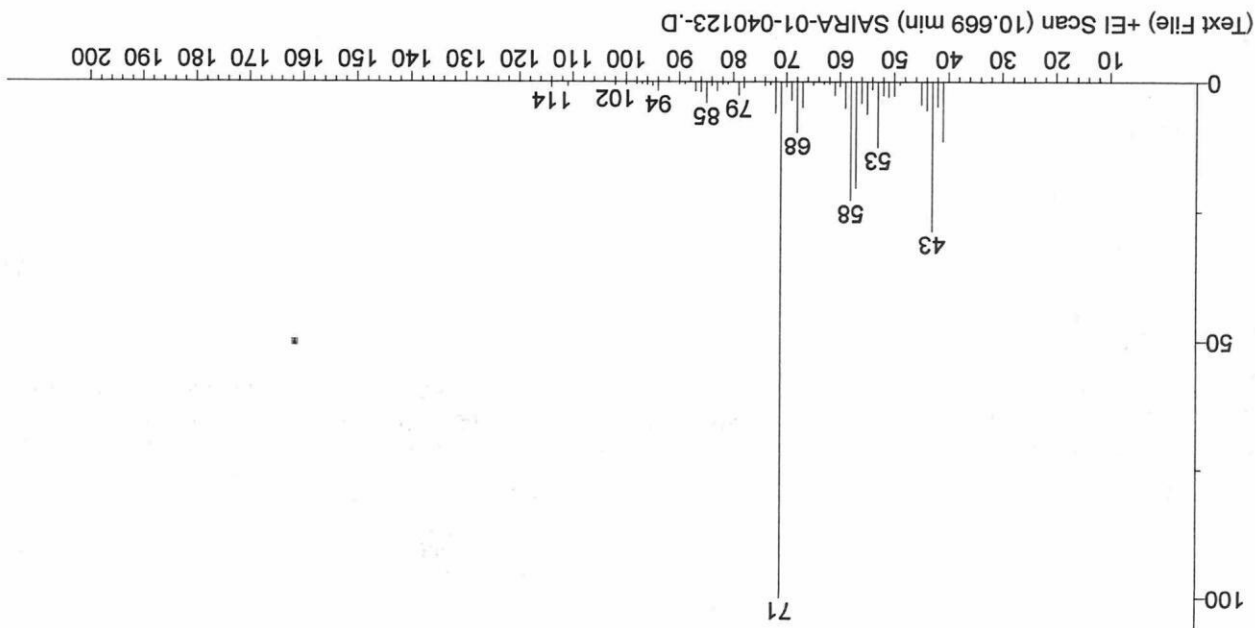

Name: Pantolactone

Formula: C<sub>6</sub>H<sub>10</sub>O<sub>3</sub>

MW: 130 CAS#: 599-04-2 NIST#: 223057 ID#: 8012 DB: replib

Other DBs: Fine, TSCA, HODOC, EINECS

Contributor: Chemical Concepts

10 largest peaks:

71 999 | 43 414 | 41 263 | 29 209 | 57 194 | 39 141 | 55 106 | 68 86 | 72 83 | 53 68 |

Synonyms:

- 1.2(3H)-Furanone, dihydro-3-hydroxy-4,4-dimethyl-, (R)-
- 2.2(3H)-Furanone, dihydro-3-hydroxy-4,4-dimethyl-, D-(-)-
- 3.(D)-Pantolactone
- 4.D-(-)-Pantolactone
- 5.D-(-)Pantoyl lactone
- 6.Pantoyl lactone
- 7.Pantothenic lactone
- 8.Pantoyl lactone
- 9.Pentoyl lactone
- 10.D-(-)-Pantoyl lactone
- 11.D-(-)-Pantoic acid lactone
- 12.D-(-)-2-Hydroxy-3,3-dimethyl-γ-butyrolactone
- 13.D-1-Hydroxy-2,2-dimethyl-3-butyrolactone
- 14.(R)-(-)-Pantolactone
- 15.Pentoyl lactone clene
- 16.3-Hydroxy-4,4-dimethyldihydro-2(3H)-furanone #

Estimated non-polar retention index (n-alkane scale):

Value: 1148 iu

Confidence interval (Diverse functional groups): 89(50%) 382(95%) iu

Retention index:

1. Value: 990 iu

Column Type: Capillary

Column Class: Standard non-polar

Active Phase: HP-1

Column Length:

50 m

Carrier Gas: N<sub>2</sub>

Column Diameter: 0.32 mm

Phase Thickness: 0.52 μm

Data Type: Normal alkane

RI

Program Type: Complex

Description: 40C => 2C/min =>130C =>4C/min => 250C

Source: Teai, T.; Claude

-Lafontaine, A.; Schippa, C.; Cozzolino, F., Volatile compounds in fresh pulp of pineapple (*Ananas comosus* [L.] Merr.) from French Polynesia, *J. Essent. Oil Res.*, 13(5), 2001, 314-318.

2. Value: 931 iu

Column Type:

Capillary

Column Class: Semi-standard non-polar

Active Phase: Squalane

Carrier Gas: N<sub>2</sub>

Data Type: Kovats

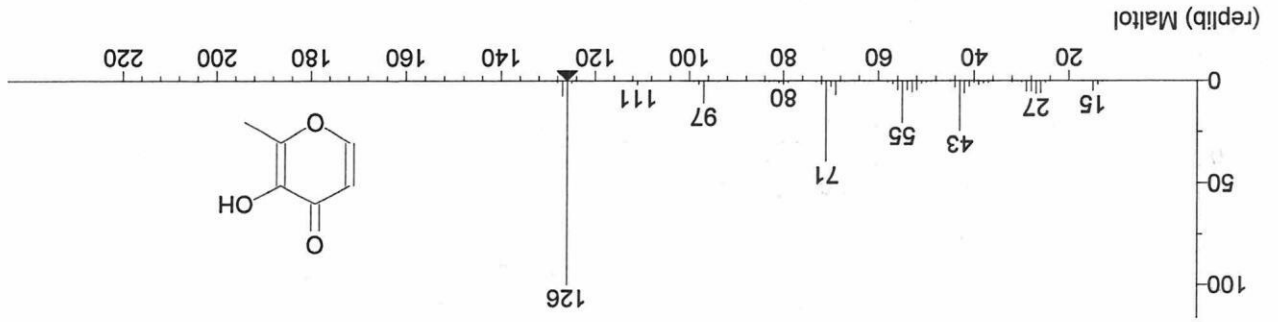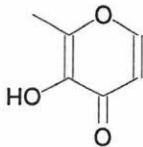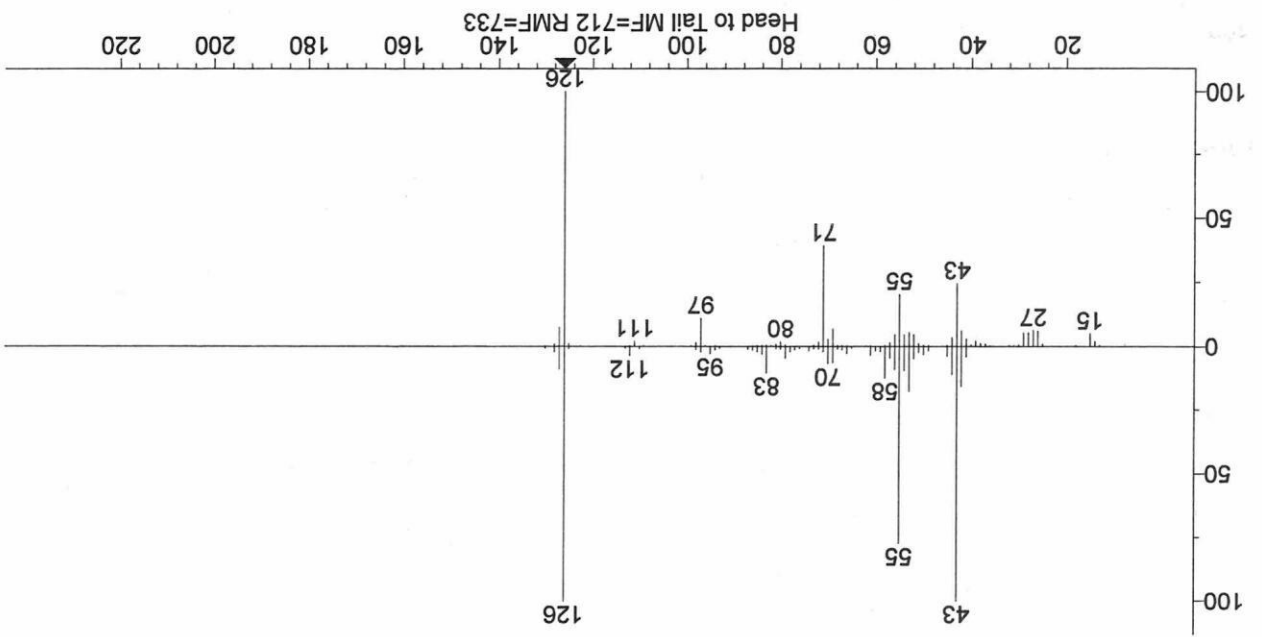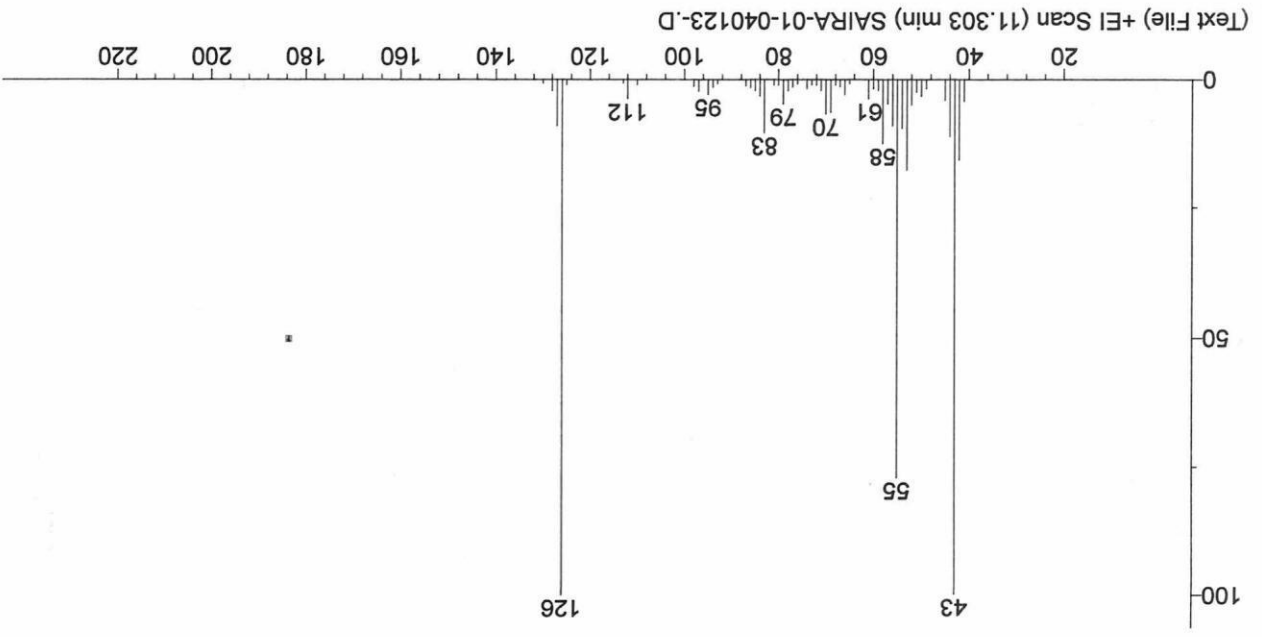

Name: Maltol

Formula: C<sub>6</sub>H<sub>6</sub>O<sub>3</sub>

MW: 126 CAS#: 118-71-8 NIST#: 2557 ID#: 17332 DB: replib

Other DBs: Fine, TSCA, RTECS, HODOC, NIH, EINECS

10 largest peaks:

126 999 | 71 392 | 43 243 | 55 202 | 97 109 | 127 74 | 69 68 | 27 62 | 42 60 | 26 59 |

Synonyms:

1. 4H-Pyran-4-one, 3-hydroxy-2-methyl-
2. Larixic acid
3. Larixinic acid
4. Palatone
5. 2-Methyl-3-hydroxypyron
6. 3-Hydroxy-2-methyl-4-pyron
7. 3-Hydroxy-2-methylpyron
8. 3-Hydroxy-2-methyl-4-pyranone
9. 3-Hydroxy-2-methyl-1,4-pyron
10. Corps praline
11. Talmon
12. Vetol
13. 2-Methyl pyromeconic acid
14. 2-Methyl-3-hydroxy-4-pyron
15. 3-Hydroxy-2-methyl-γ-pyron
16. 3-Hydroxy-2-methyl-4H-pyran-4-one
17. 2-Methyl-3-oxy-γ-pyron
18. Veltol

Estimated non-polar retention index (n-alkane scale):

Value: 1063 iu

Confidence interval (Diverse functional groups): 89(50%) 382(95%) iu

Retention index.

1. Value: 1092.2 iu

Column Type: Capillary

Column Class: Standard non-polar

Active Phase: SE-30

Column

Length: 40 m

Column Diameter: 0.35 mm

Phase Thickness: 0.35 μm

Data Type: Kovats RI

Program Type:

Isothermal

Start T: 100 C

Source: Tudor, E., Temperature dependence of the retention index for perfumery

compounds on a SE-30 glass capillary column. I. Linear equations, J. Chromatogr. A, 779, 1997, 287-297.

2.

Value: 1130 iu

Column Type: Packed

Column Class: Standard non-polar

Active Phase: SE-30

Column Length:

6 m

Carrier Gas: He

(mainlib) 2(5H)-Furanone, 3-hydroxy-4,5-dimethyl-

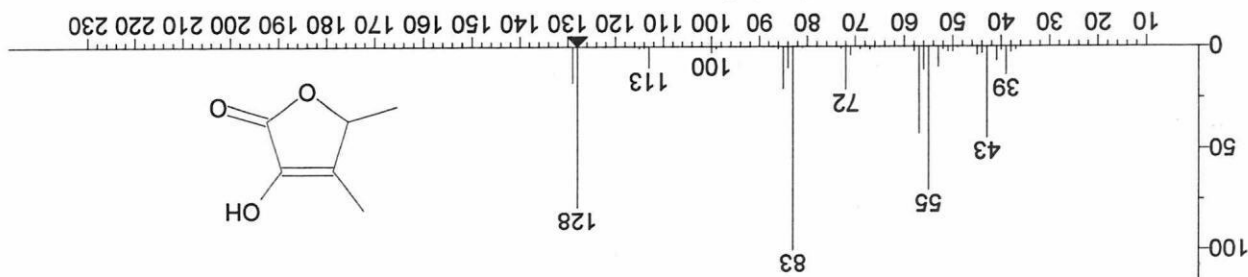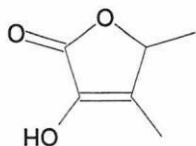

Head to Tail MF=701 RMF=759

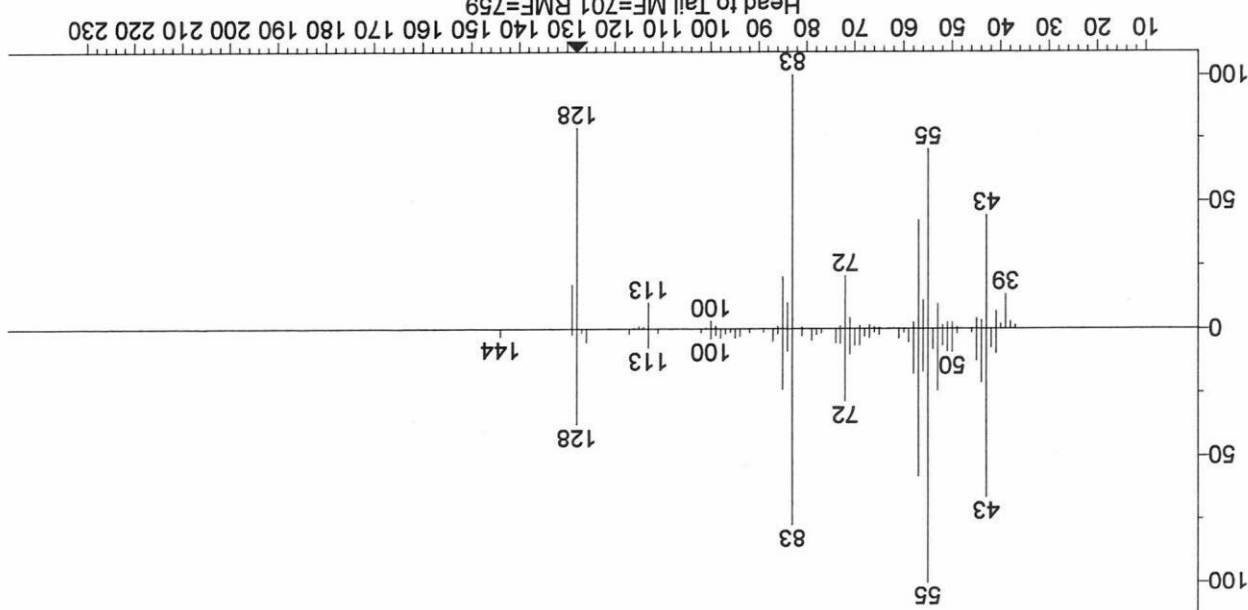

(Text File) +EI Scan (11.930 min) SAIRA-01-040123.D

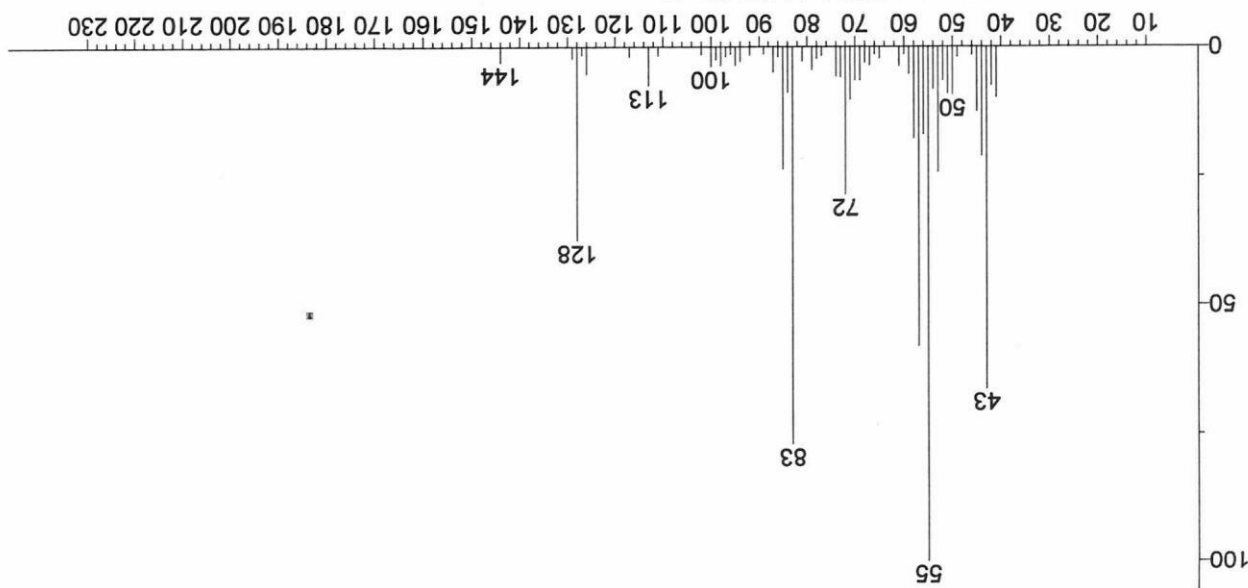

Name: 2(5H)-Furanone, 3-hydroxy-4,5-dimethyl-  
Formula: C<sub>6</sub>H<sub>8</sub>O<sub>3</sub>  
MW: 128 CAS#: 28664-35-9 NIST#: 265961 ID#: 45390 DB: mainlib  
Other DBs: EINECS  
Contributor: A.A.Kutin, Moscow, Russia

10 largest peaks:

83 999 | 128 787 | 55 702 | 43 443 | 57 423 | 72 206 | 85 202 | 129 173 | 39 135 | 56 111 |

Synonyms:

1. Sotolone  
2. 4,5-Dimethyl-3-hydroxy-2(5H)-furanone  
3. Furan-2(5H)-one, 3-hydroxy-4,5-dimethyl-  
4. 3-Hydroxy-4,5-dimethyl-2(5H)-furanone #

Estimated non-polar retention index (n-alkane scale):

Value: 1088 iu

Confidence interval (Diverse functional groups): 89(50%) 382(95%) iu

Retention index.

1. Value: 1108 iu

Column Type: Capillary

Column Class: Standard non-polar

Active Phase: SPB-1

Column

Length: 30 m

Carrier Gas: He

Column Diameter: 0.25 mm

Phase Thickness: 0.25 µm

Data Type: Linear

RI

Program Type: Ramp

Start T: 35 C

End T: 225 C

Heat Rate: 4 K/min

Start Time: 5 min

End Time: 20

min

Source: Chisholm, M.G.; Jell, J.A.; Cass, D.M., Jr., Characterization of the major odorants found in the peel oil of Citrus reticulata Blanco cv. Clementine using gas chromatography-olfactometry, Flavour Fragr. J., 18, 2003, 275-281.

2. Value: 1068 iu

Column Type: Capillary

Column Class: Standard non-polar

Active Phase: CP Sil 5

CB

Column Length: 50 m

Carrier Gas: He

Column Diameter: 0.32 mm

Phase Thickness: 1.2 µm

Data Type:

Normal alkane RI

Program Type: Complex

Description: 36C =>20C/min =>85C=>1C/min =>145C=>3C/min

=>250C

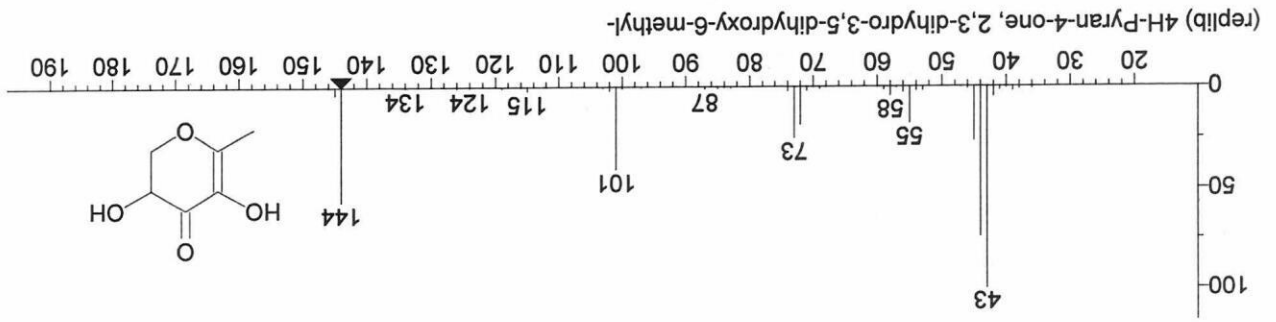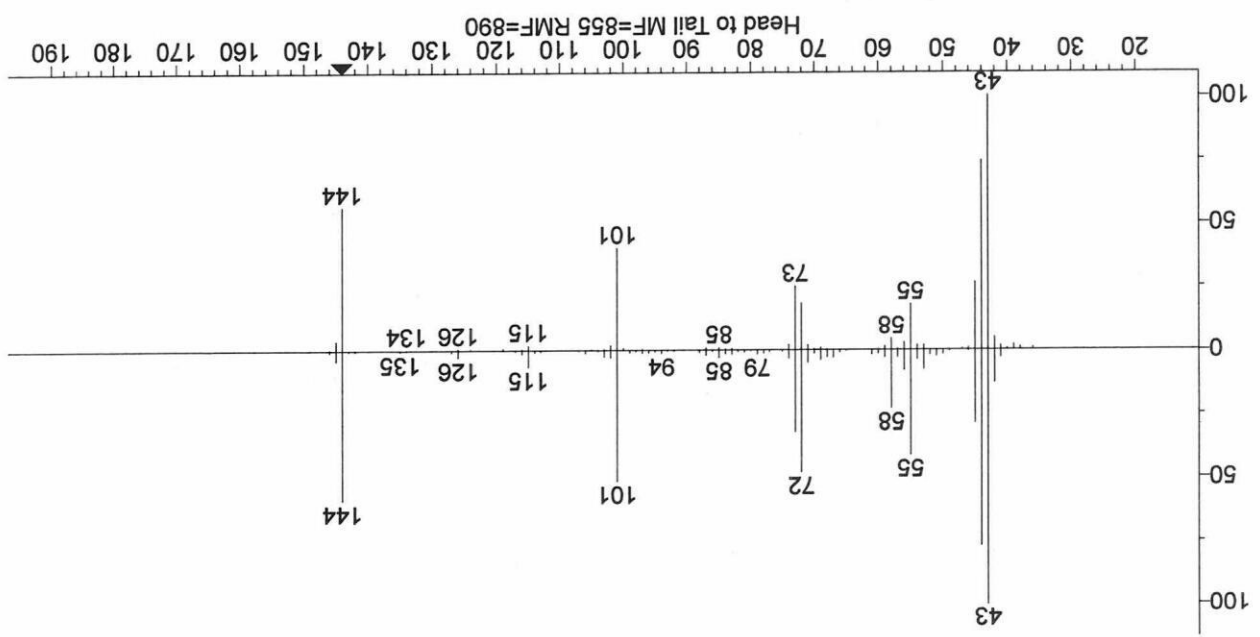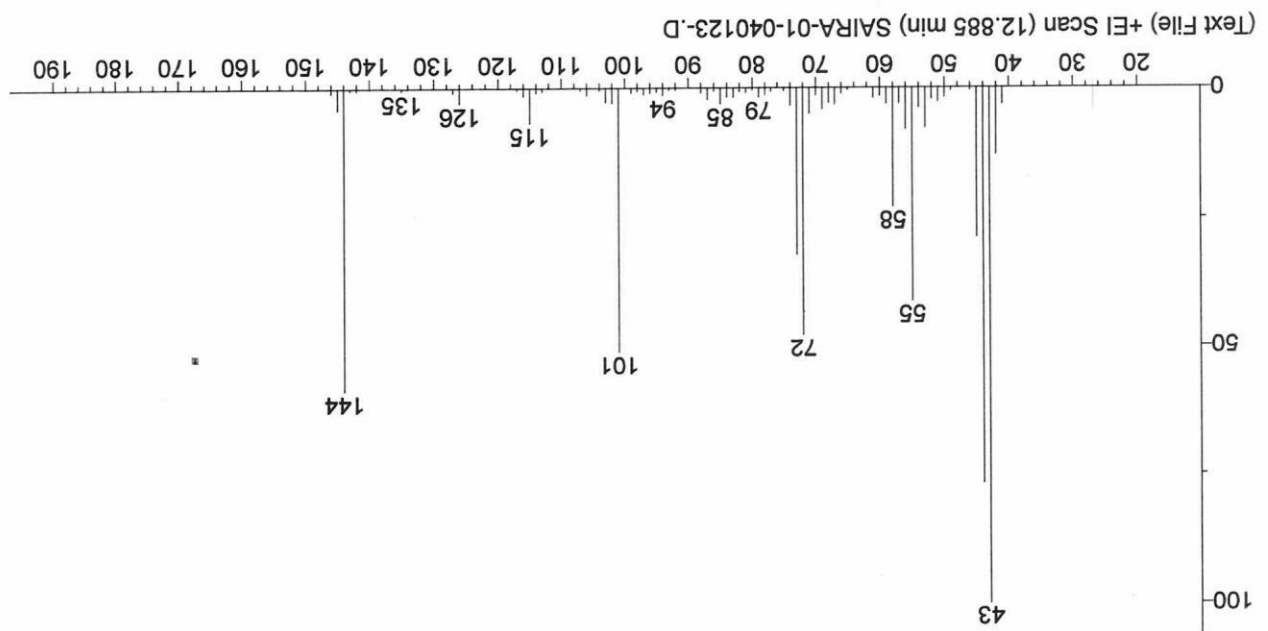

Name: 4H-Pyran-4-one, 2,3-dihydro-3,5-dihydroxy-6-methyl-

Formula: C<sub>6</sub>H<sub>8</sub>O<sub>4</sub>

MW: 144 CAS#: 28564-83-2 NIST#: 108691 ID#: 1857 DB: replib

Other DBs: RTECS

Contributor: Philip Morris R&D

10 largest peaks:

43 999 | 44 742 | 144 563 | 101 402 | 45 264 | 73 249 | 72 182 | 55 177 | 42 48 | 58 43 |

Synonyms:

1,3,5-Dihydroxy-6-methyl-2,3-dihydro-4H-pyran-4-one #

Estimated non-polar retention index (n-alkane scale):

Value: 1269 iu

Confidence interval (Diverse functional groups): 89(50%) 382(95%) iu

Retention index.

1. Value: 1119 iu

Column Type: Capillary

Column Class: Standard non-polar

Active Phase: DB-1

Column

Length: 60 m

Carrier Gas: He

Column Diameter: 0.25 mm

Phase Thickness: 0.25 um

Data Type: Linear

RI

Program Type: Complex

Description: -20C (5min) => 10C/min => 100C => 4C/min =>200C => 10C/min => 280C

Source: Eri, S.; Khoo, B.K.; Lech, J.; Hartman, T.G., Direct thermal desorption-gas chromatography and gas chromatography-mass spectrometry profiling of hop (*Humulus lupulus* L.) essential oils in support of varietal characterization, *J. Agric. Food Chem.*, 48, 2000, 1140-1149.

2. Value: 1107 iu

Column Type: Capillary

Column

Class: Standard non-polar

Active Phase: DB-1

Column Length: 60 m

Carrier Gas: N<sub>2</sub>

Column Diameter: 0.25

mm

Phase Thickness: 1 um

Data Type: Linear RI

Program Type: Ramp

Start T: 30 C

End T: 200 C

Heat

Rate: 5 K/min

End Time: 30 min

Source: Wu, C.-M.; Wang, Z.; Wu, Q.H., Volatile compounds produced from monosodium glutamate in common food cooking, *J. Agric. Food Chem.*, 48, 2000, 2438-2442.

<...>



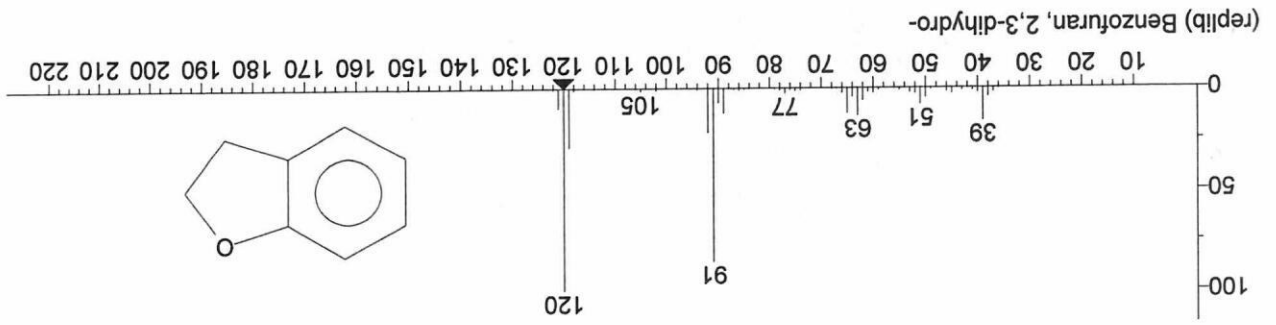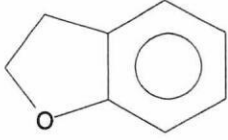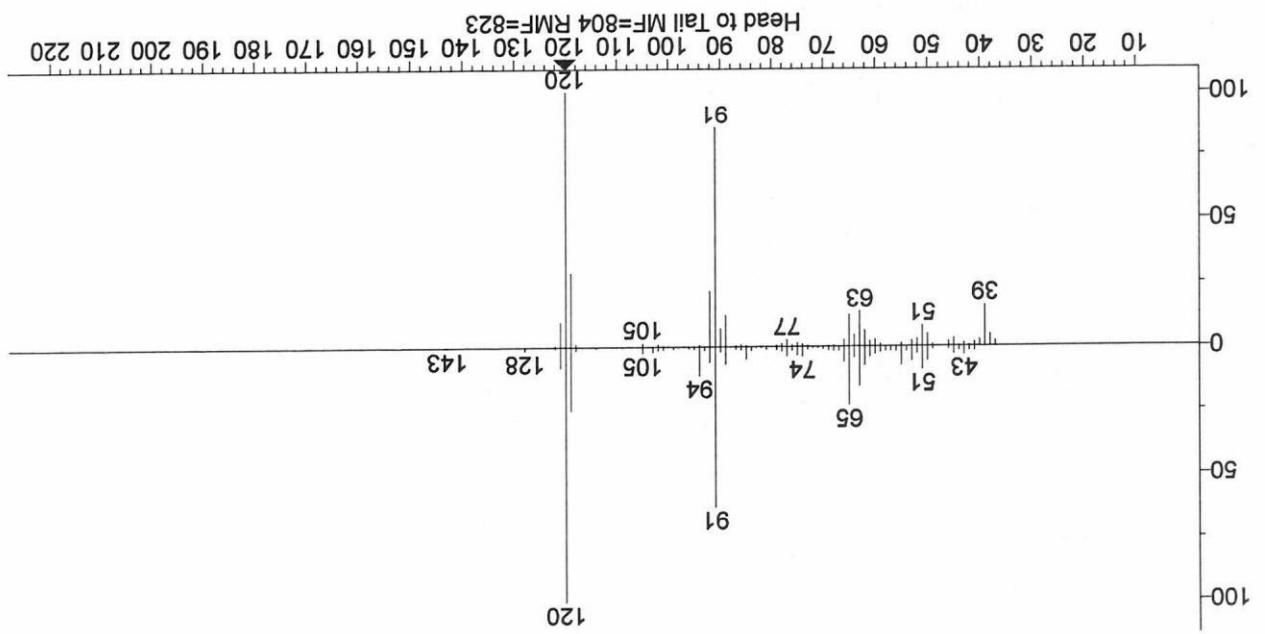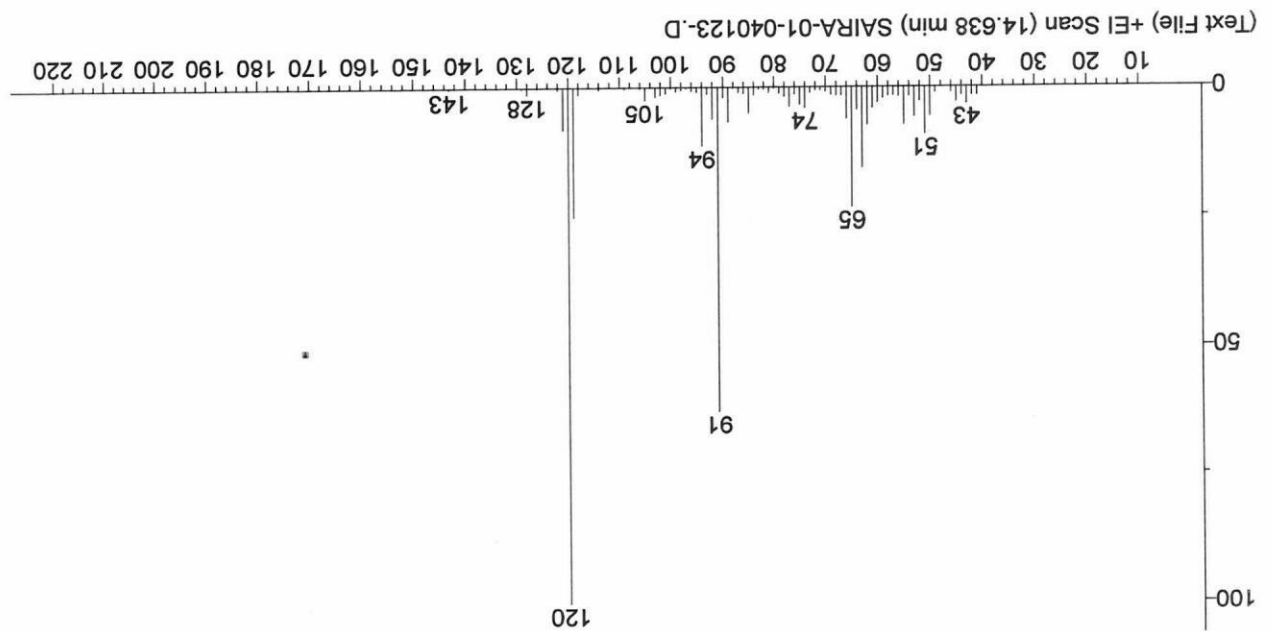

Name: Benzofuran, 2,3-dihydro-

Formula: C<sub>8</sub>H<sub>8</sub>O

MW: 120 CAS#: 496-16-2 NIST#: 109771 ID#: 16156 DB: replib

Other DBs: Fine, TSCA, EPA, HODOC, EINECS, IRDB

Contributor: Philip Morris R&D

10 largest peaks:

120 999 | 91 855 | 119 288 | 92 216 | 39 159 | 63 134 | 65 122 | 89 121 | 121 96 | 51 80 |

Synonyms:

1. Coumaran

2. Dihydrobenzofuran

3. Dihydrocoumarone

4. Kumaran

5. 2,3-Dihydrobenzofuran

6. 2,3-Dihydro-1-benzofuran #

Estimated non-polar retention index (n-alkane scale):

Value: 1036 iu

Confidence interval (Ethers): 68(50%) 293(95%) iu

Retention index.

1. Value: 1188 iu

Column Type: Capillary

Column Class: Standard non-polar

Active Phase: DB-1

Column

Length: 30 m

Carrier Gas: N<sub>2</sub>

Column Diameter: 0.32 mm

Phase Thickness: 0.25 μm

Data Type: Linear

RI

Program Type: Ramp

Start T: 150 C

End T: 280 C

Heat Rate: 3 K/min

Source: Coen, M.; Engel, R.;

Nahrstedt, A., Chavicol .beta.-D-glucoside, a phenylpropanoid heteroside, benzyl-.beta.-D-glucoside and glycosidically bound volatiles from subspecies of *Cedronella canariensis*, *Phytochemistry*, 40(1), 1995, 149-155.

2. Value: 1187 iu

Column Type: Capillary

Column Class: Standard non-polar

Active Phase: SPB-1

Column

Length: 50 m

Carrier Gas: He

Column Diameter: 0.20 mm

Data Type: Kovats RI

Program Type: Ramp

Start T:

35 C

End T: 200 C

Heat Rate: 3 K/min

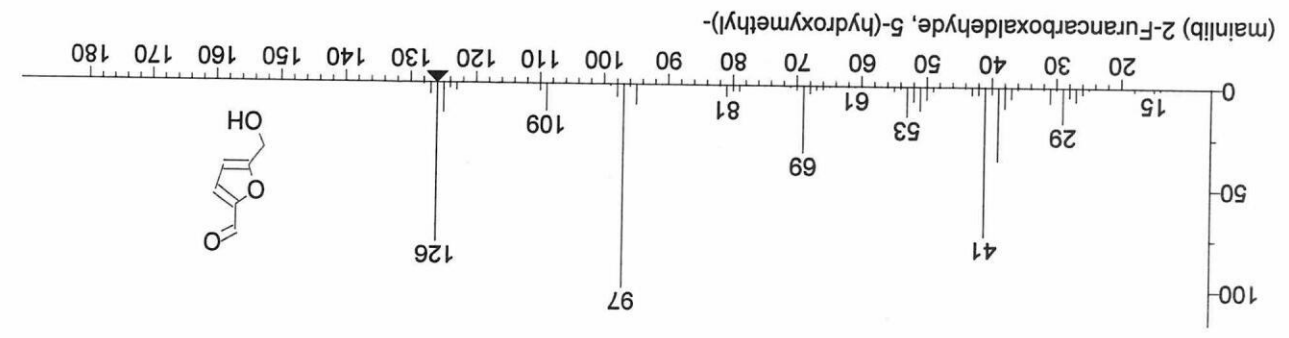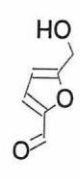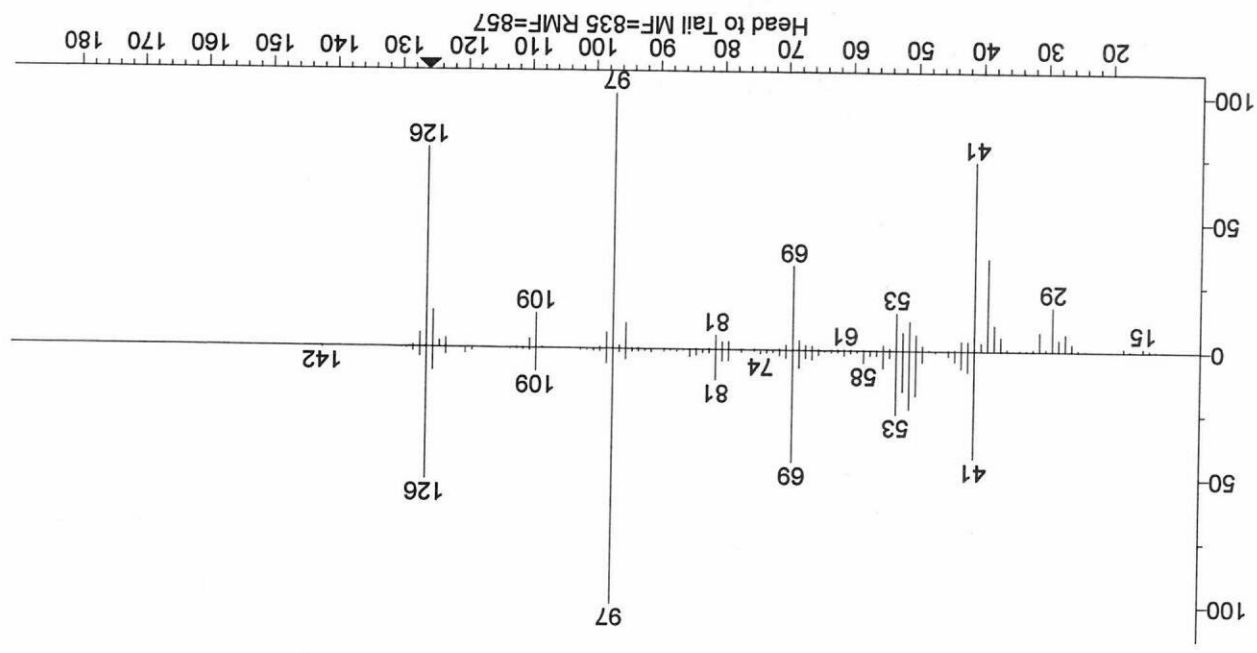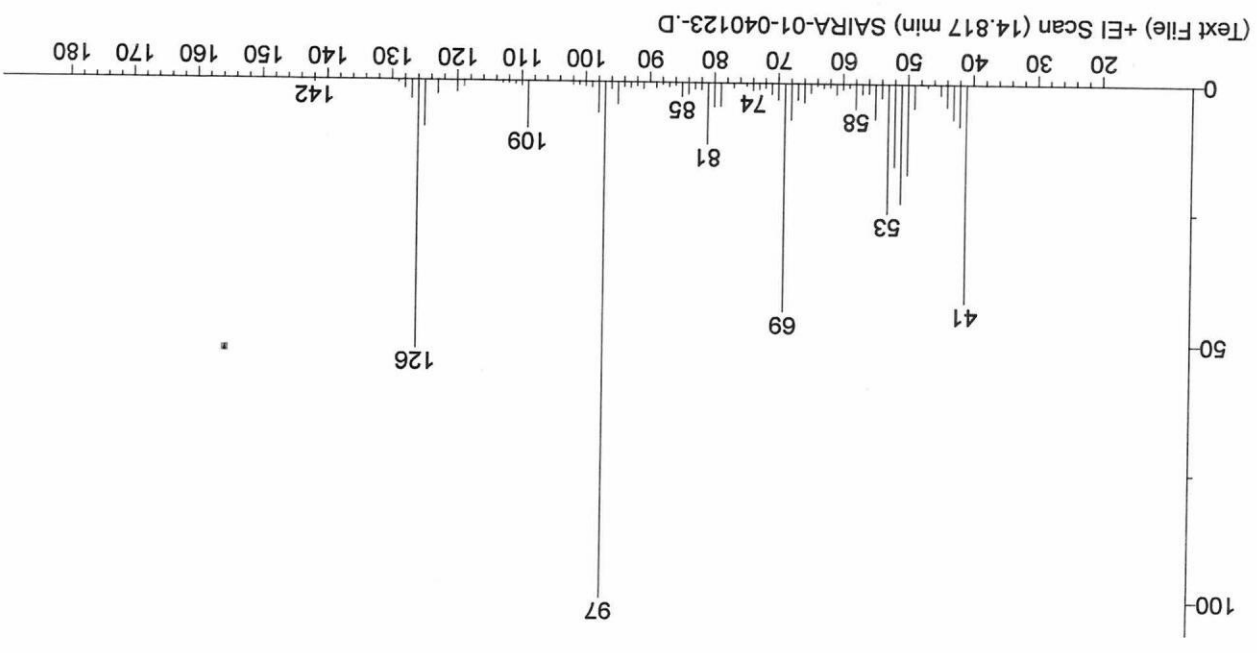

Name: 2-Furancarboxaldehyde, 5-(hydroxymethyl)-

Formula: C<sub>6</sub>H<sub>6</sub>O<sub>3</sub>

MW: 126 CAS#: 67-47-0 NIST#: 231276 ID#: 60271 DB: mainlib

Other DBs: Fine, TSCA, RTECS, HODOC, NIH, EINECS

Contributor: Japan AIST/NIMC Database- Spectrum MS-NW-4745

10 largest peaks:

97 999 | 126 779 | 41 732 | 39 358 | 69 326 | 29 171 | 53 145 | 125 145 | 109 134 | 51 115 |

Synonyms:

1.2-Furaldehyde, 5-(hydroxymethyl)-

2.5-Hydroxymethylfurfural

3.Hydroxymethylfurfurole

4.HMF

5.5-(Hydroxymethyl)Furfurole

6.5-(Hydroxymethyl)-2-formylfuran

7.5-(Hydroxymethyl)-2-furaldehyde

8.5-(Hydroxymethyl)-2-furancarboxal

9.5-(Hydroxymethyl)-2-furfural

10.5-(Hydroxymethyl)-2-furfuraldehyde

11.5-(Hydroxymethyl)furan-2-aldehyde

12.5-(Hydroxymethyl)furfural

13.5-Hydroxymethylfuraldehyde

14.5-Oxymethylfurfurole

15.5-Hydroxymethylfurfuraldehyde

16.5-Hydroxymethyl-2-furancarboxaldehyde

17.Hydroxymethylfurfuraldehyde

18.5-(Hydroxymethyl)-2-furancarboxaldehyde

19.2-Hydroxymethyl-5-furfural

Estimated non-polar retention index (n-alkane scale):

Value: 1163 iu

Confidence interval (Diverse functional groups): 89(50%) 382(95%) iu

Retention index.

1. Value: 1176 iu

Column Type: Capillary

Column Class: Standard non-polar

Active Phase: DB-1

Column

Length: 60 m

Carrier Gas: N<sub>2</sub>

Column Diameter: 0.25 mm

Phase Thickness: 1 μm

Data Type: Linear

RI

Program Type: Ramp

Start T: 30 C

End T: 200 C

Heat Rate: 5 K/min

End Time: 30 min

Source: Wu, C.-M.;

Wang, Z.; Wu, Q.H., Volatile compounds produced from monosodium glutamate in common food cooking, J. Agric. Food Chem., 48, 2000, 2438-2442.

2. Value: 1208 iu

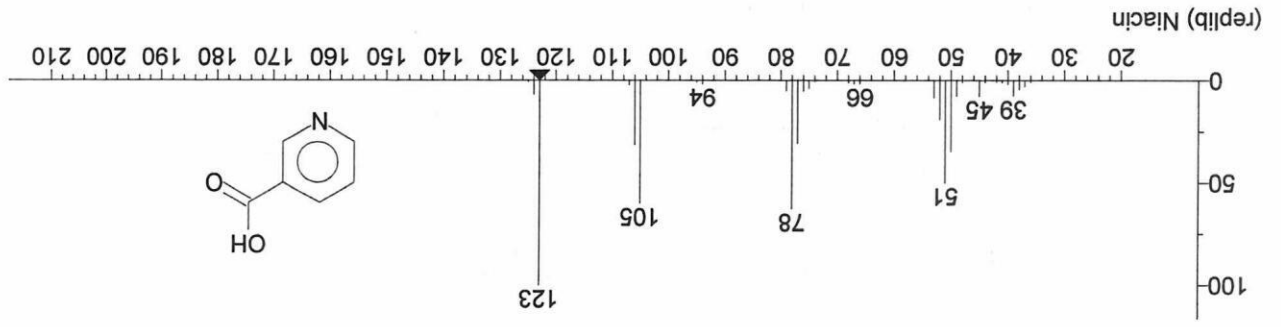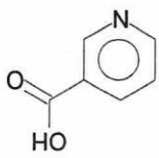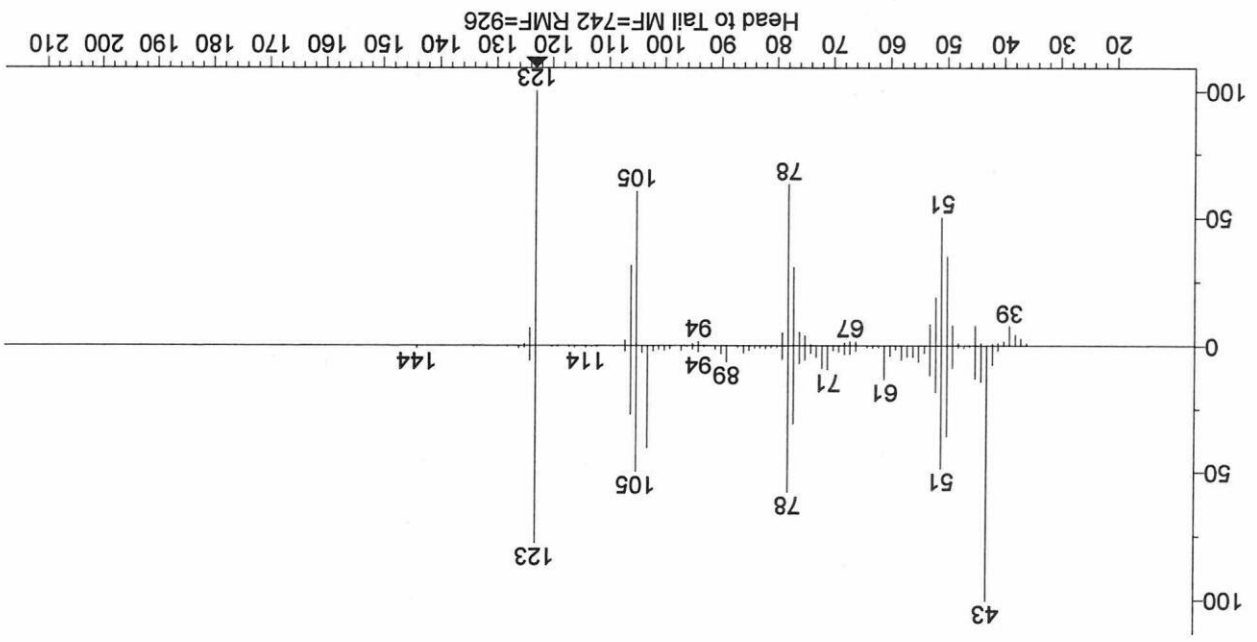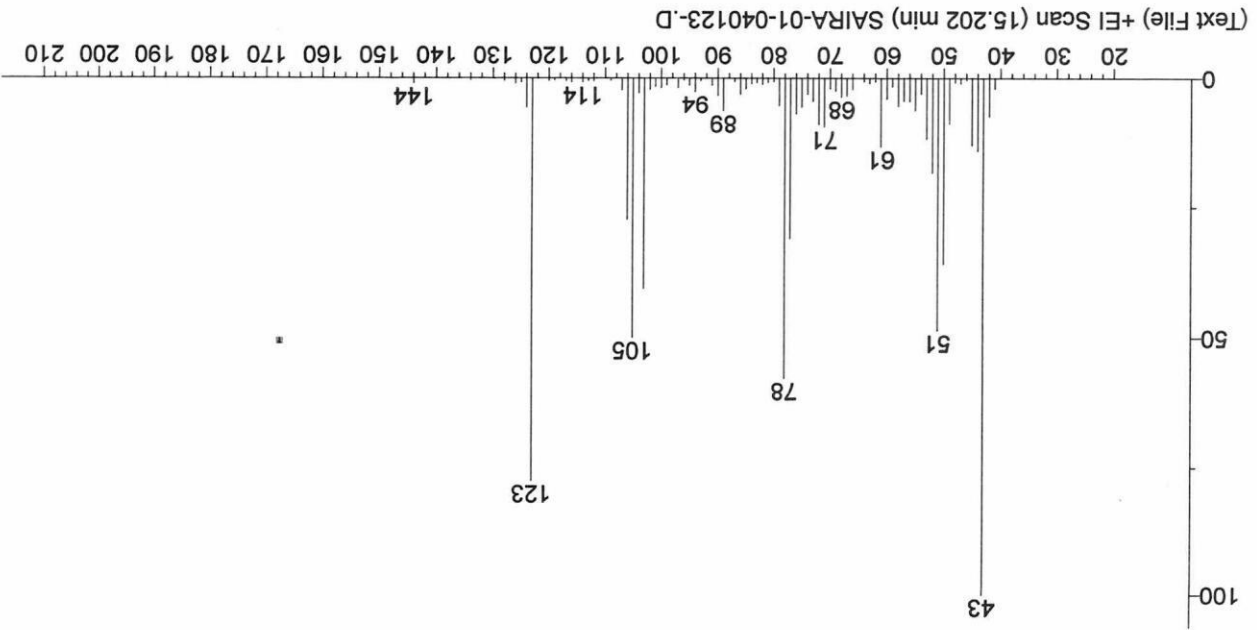

Name: Niacin

Formula: C<sub>6</sub>H<sub>5</sub>NO<sub>2</sub>

MW: 123 CAS#: 59-67-6 NIST#: 312948 ID#: 16856 DB: replib

Other DBs: Fine, TSCA, RTECS, USP, HODOC, NIH, EINECS, IRDB

Contributor: Dr. P.K. Shah, NYC Police Laboratory, NY

10 largest peaks:

123 999 | 78 626 | 105 600 | 51 500 | 50 347 | 106 315 | 77 307 | 52 189 | 53 83 | 49 77 |

Synonyms:

- 1.3-Pyridinecarboxylic acid
- 2.Nicotinic acid
- 3.Akotin
- 4.Apelagrin
- 5.Daskil
- 6.Efacin
- 7.Linic
- 8.Nicacid
- 9.Nicangin
- 10.Nico-Span
- 11.Nicodelmine
- 12.Nicolar
- 13.Niconacid
- 14.Nicosan 3
- 15.Nicotinipca
- 16.Nicyl
- 17.Nyclin
- 18.Pellagrin
- 19.Pelonin
- 20.Pyridine-β-carboxylic acid
- 21.Vitamin B
- 22.3-Carboxypyridine
- 23.3-Carboxypyridine
- 24.anti-Pellagra vitamin
- 25.Acidum nicotinicum
- 26.Bionic
- 27.Davitamon PP
- 28.Diacin
- 29.Direktan
- 30.Naotin
- 31.Niac
- 32.Nicamin
- 33.Nico-400
- 34.Nicobid
- 35.Nicocap
- 36.Nicocidin
- 37.Nicocrisina
- 38.Nicodan
- 39.Nicodon
- 40.Niconat
- 41.Niconazid
- 42.Nicorol
- 43.Nicoside
- 44.Nicosyl
- 45.Nicotamin
- 46.Nicotene

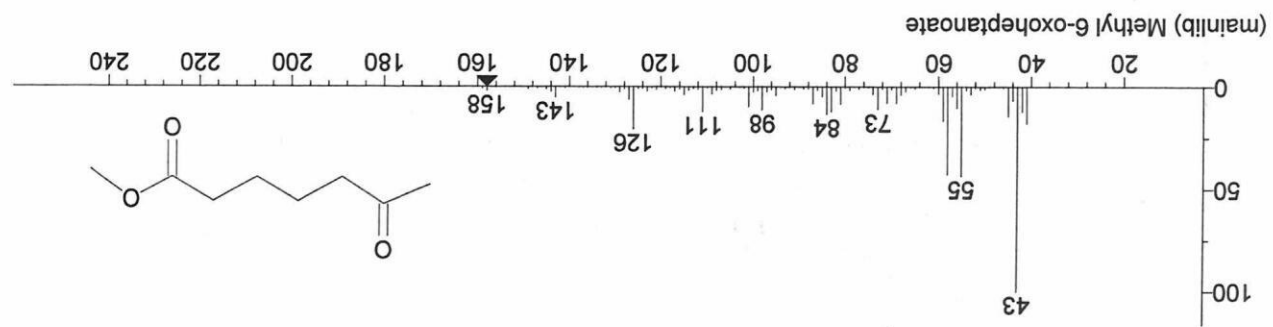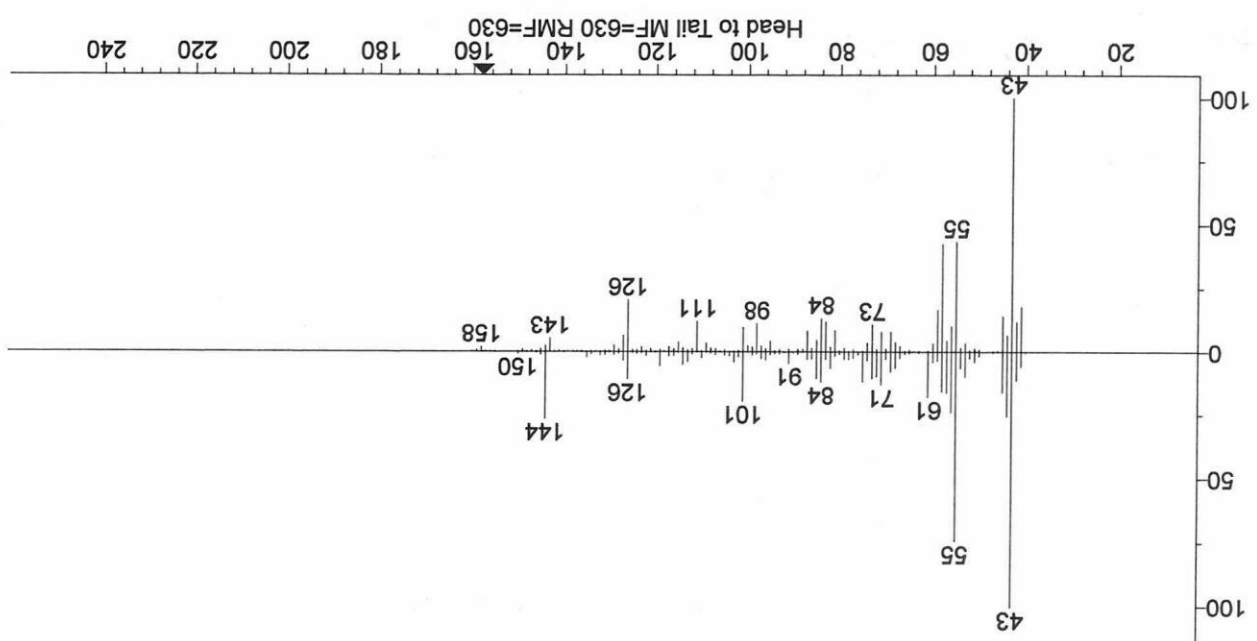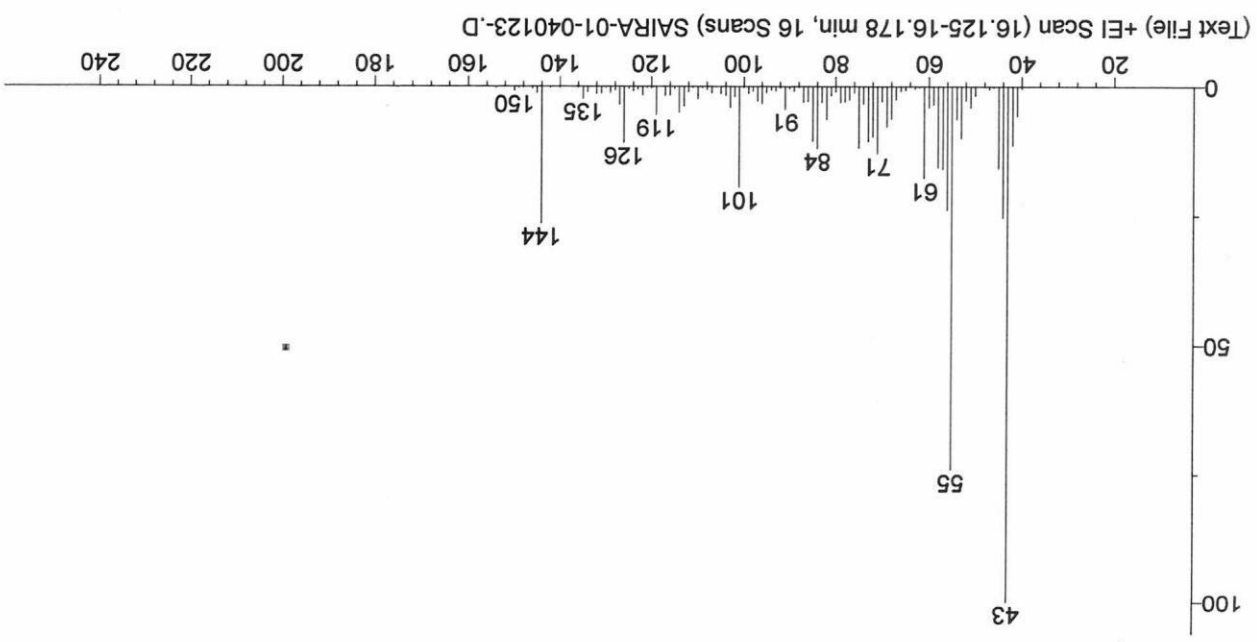

Name: Methyl 6-oxoheptanoate

Formula: C<sub>8</sub>H<sub>14</sub>O<sub>3</sub>

MW: 158 CAS#: 2046-21-1 NIST#: 116666 ID#: 6770 DB: mainlib

Other DBs: None

Contributor: K. Jacobson, LBC, NIDDK, NIH, Bethesda, MD 20892

10 largest peaks:

43 999 | 55 433 | 58 425 | 126 205 | 41 177 | 59 164 | 45 142 | 84 132 | 111 121 | 42 120 |

Synonyms:

1.5-Acetylvaleric acid, methyl ester

Estimated non-polar retention index (n-alkane scale):

Value: 1120 iu

Confidence interval (Diverse functional groups): 89(50%) 382(95%) iu



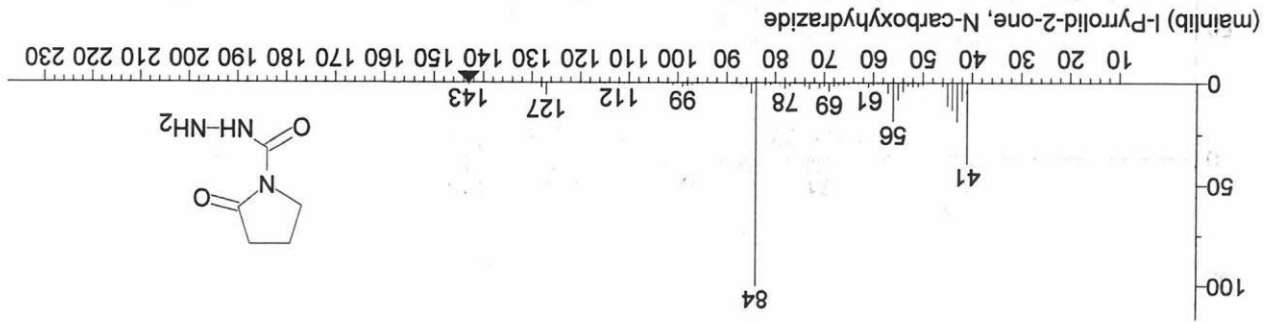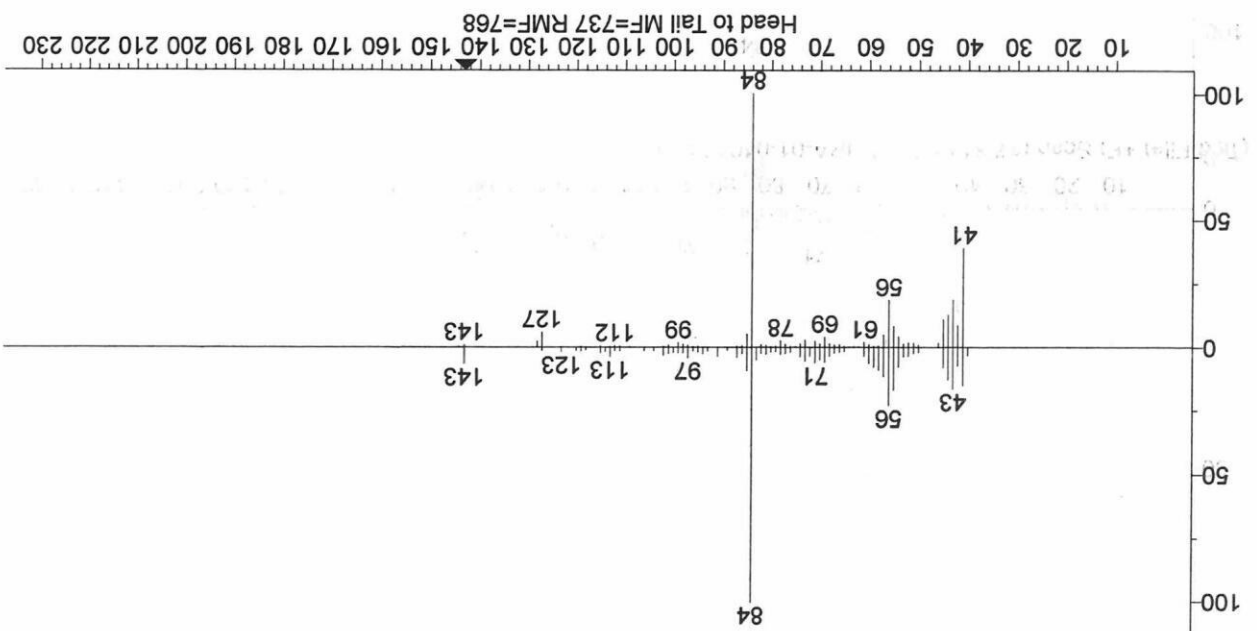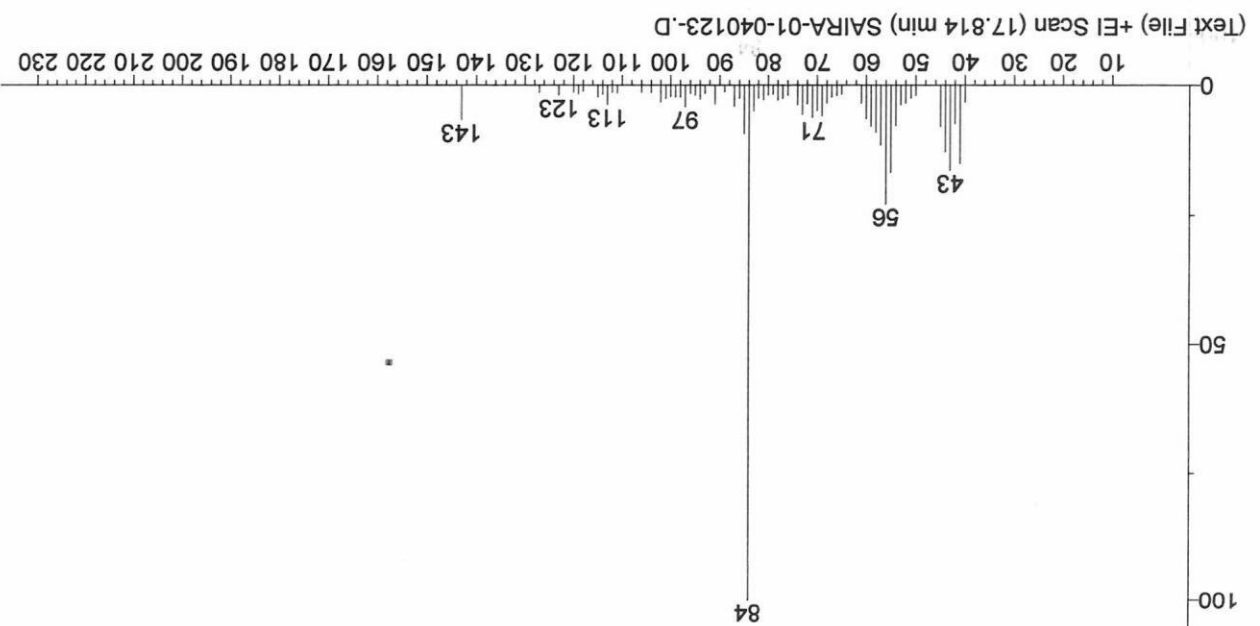

Name: l-Pyrrolid-2-one, N-carboxyhydrazide

Formula: C<sub>5</sub>H<sub>9</sub>N<sub>3</sub>O<sub>2</sub>

MW: 143 NIST#: 130586 ID#: 45666 DB: mainlib

Contributor: LAC, NIDDK, NIH, Bethesda, MD 20892

10 largest peaks:

84 999 | 41 390 | 43 186 | 56 184 | 44 129 | 45 111 | 42 86 | 55 82 | 127 59 | 85 52 |

Synonyms:

no synonyms.

Estimated non-polar retention index (n-alkane scale):

Value: 1563 iu

Confidence interval (Nitrogen-containing): 83(50%) 356(95%) iu

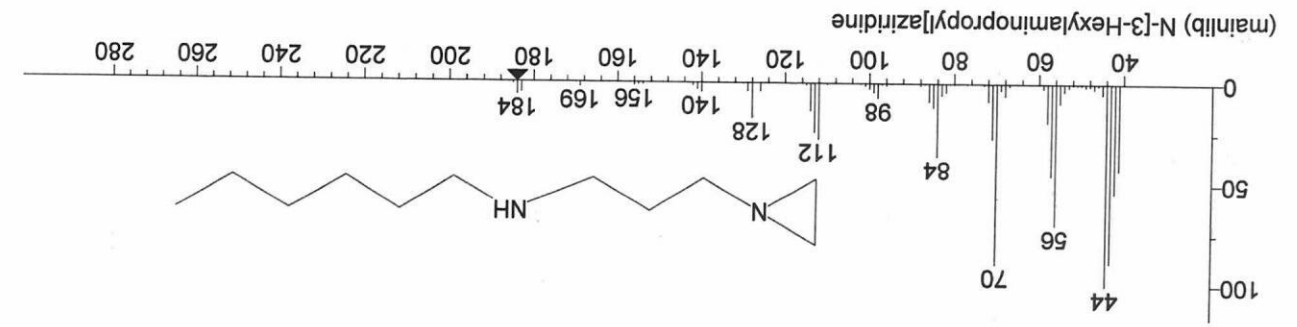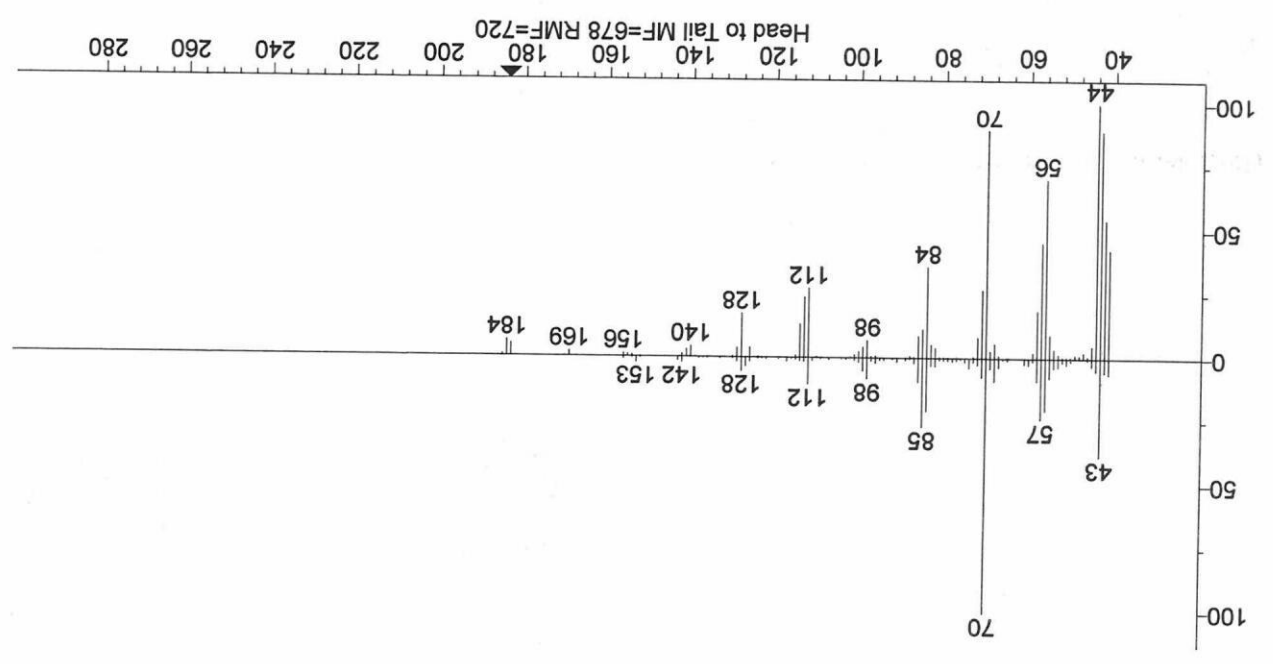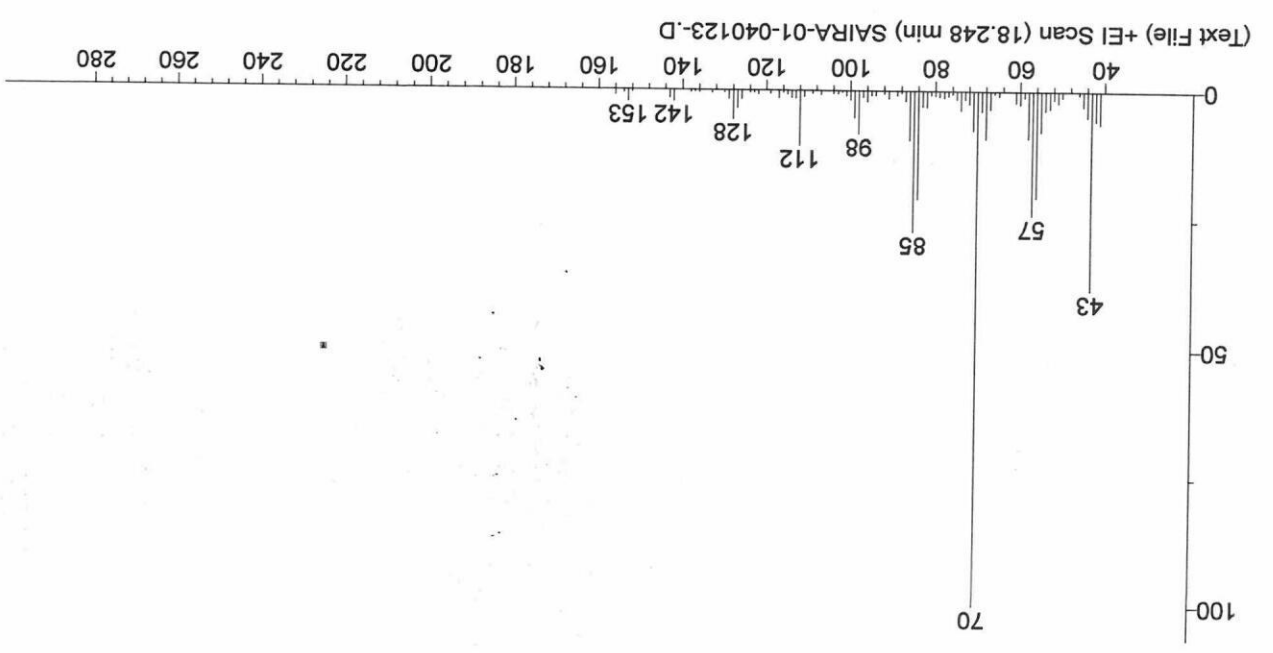

Name: N-[3-Hexylaminopropyl]aziridine

Formula: C<sub>11</sub>H<sub>24</sub>N<sub>2</sub>

MW: 184 NIST#: 256197 ID#: 14285 DB: mainlib

Contributor: Div. of Experiment Therapeutics WRAIR, WRAMC, Washington DC 20307

10 largest peaks:

44 999 | 70 891 | 43 886 | 56 699 | 42 541 | 57 454 | 41 427 | 84 359 | 112 274 | 71 268 |

Synonyms:

no synonyms.

Estimated non-polar retention index (n-alkane scale):

Value: 1467 iu

Confidence interval (Nitrogen-containing): 83(50%) 356(95%) iu

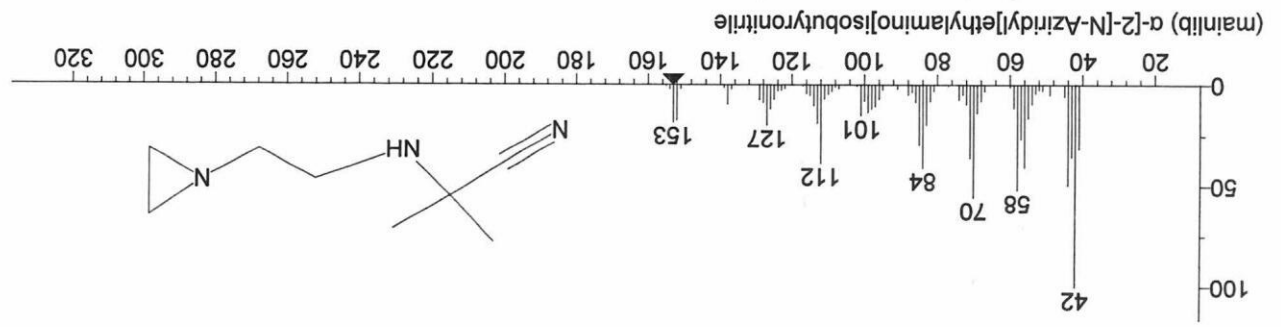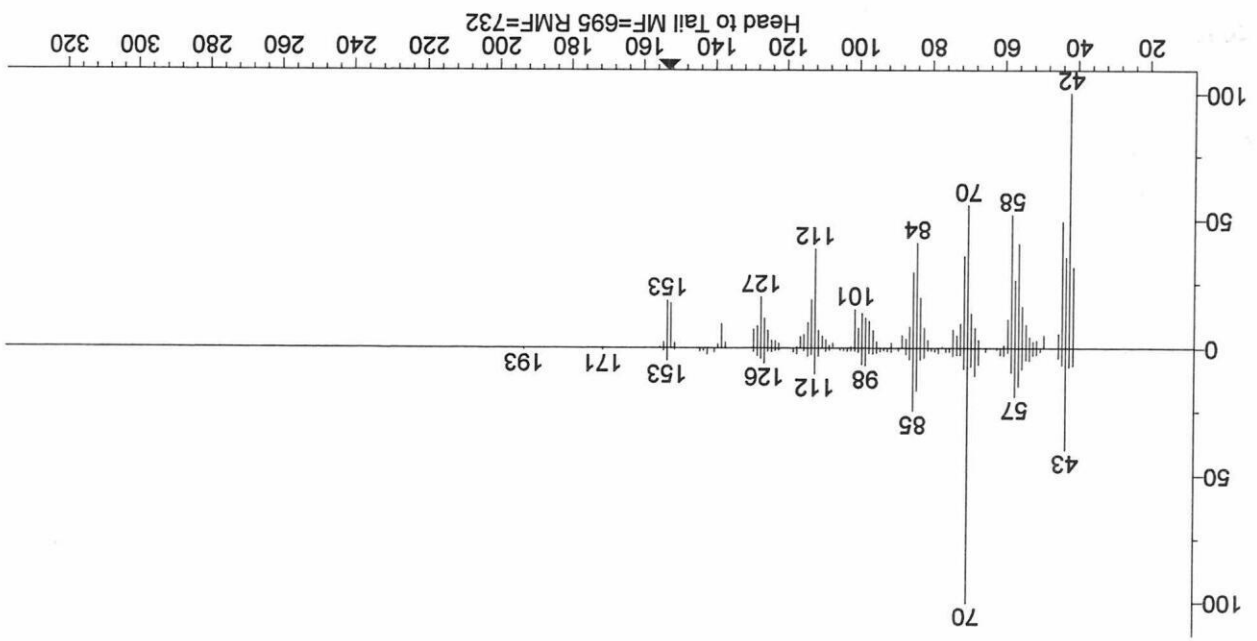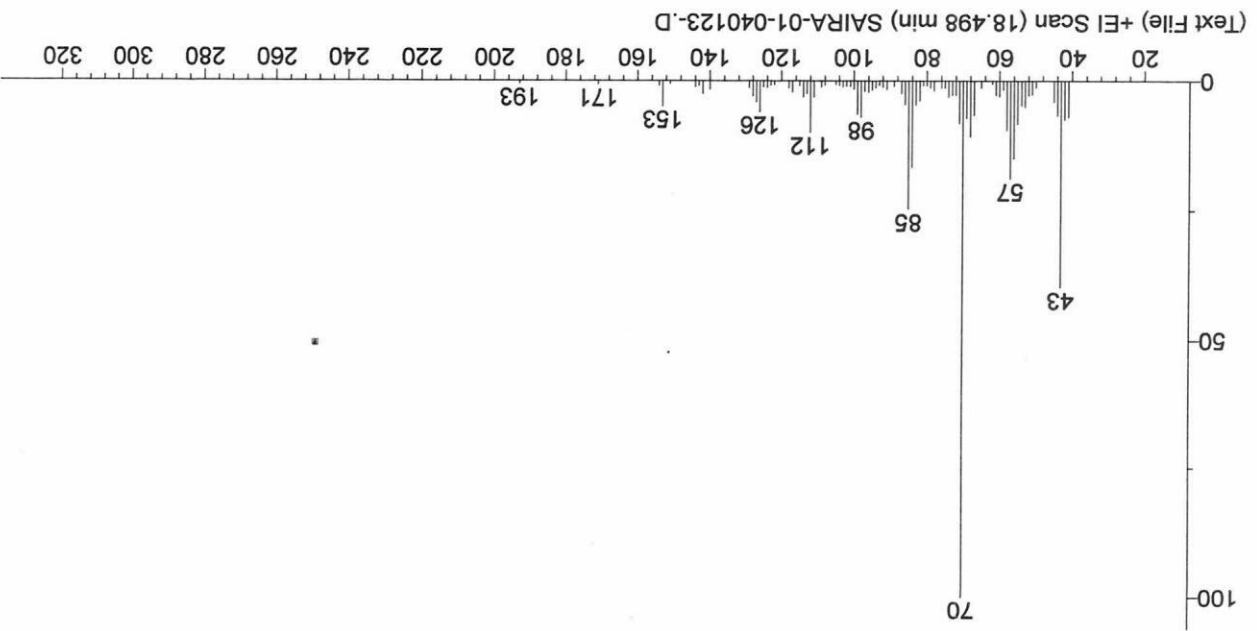

Name:  $\alpha$ -[2-[N-Aziridyl]ethylamino]isobutyronitrile

Formula: C<sub>8</sub>H<sub>15</sub>N<sub>3</sub>

MW: 153 NIST#: 256198 ID#: 4530 DB: mainlib

Contributor: Div. of Experiment Therapeutics WRAIR, WRAMC, Washington DC 20307

10 largest peaks:

42 999 | 70 555 | 58 518 | 44 493 | 84 409 | 56 406 | 112 386 | 71 358 | 43 353 | 41 315 |

Synonyms:

no synonyms.

Estimated non-polar retention index (n-alkane scale):

Value: 1329 iu

Confidence interval (Nitrogen-containing): 83(50%) 356(95%) iu

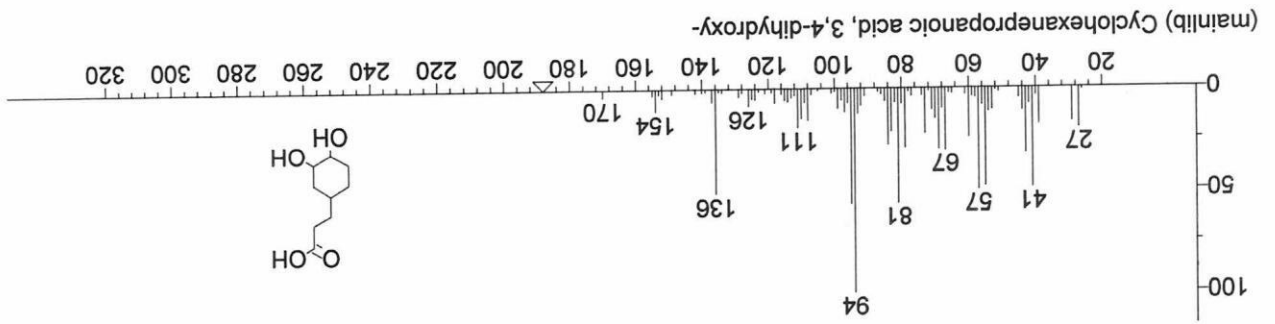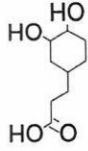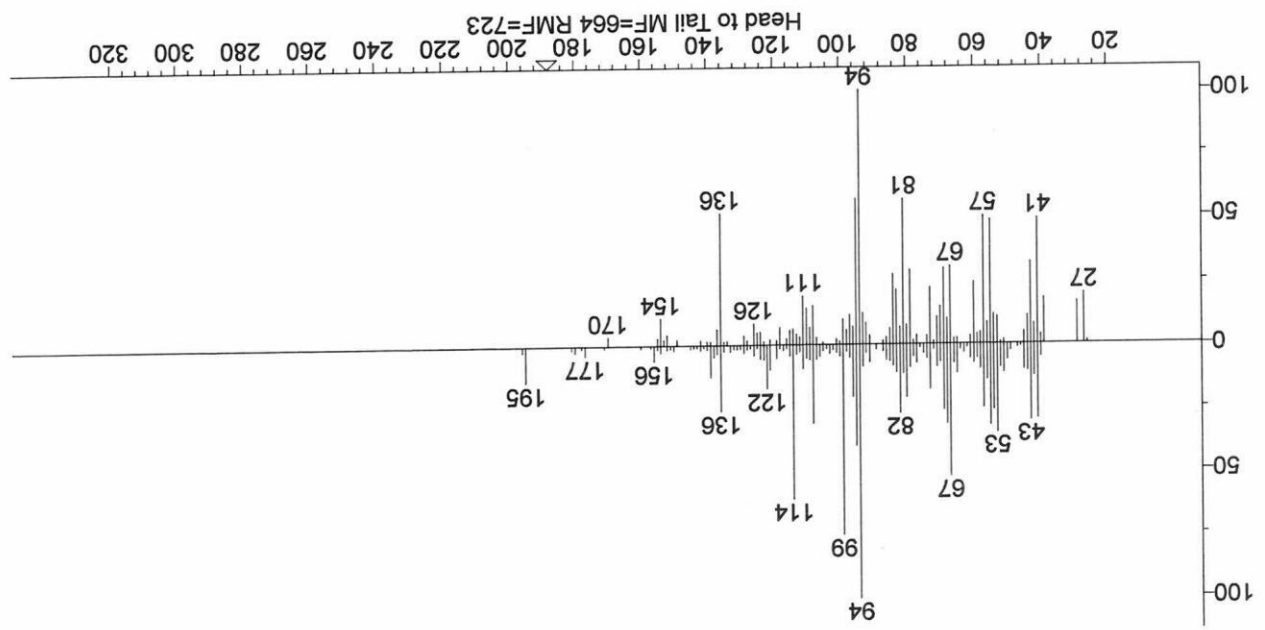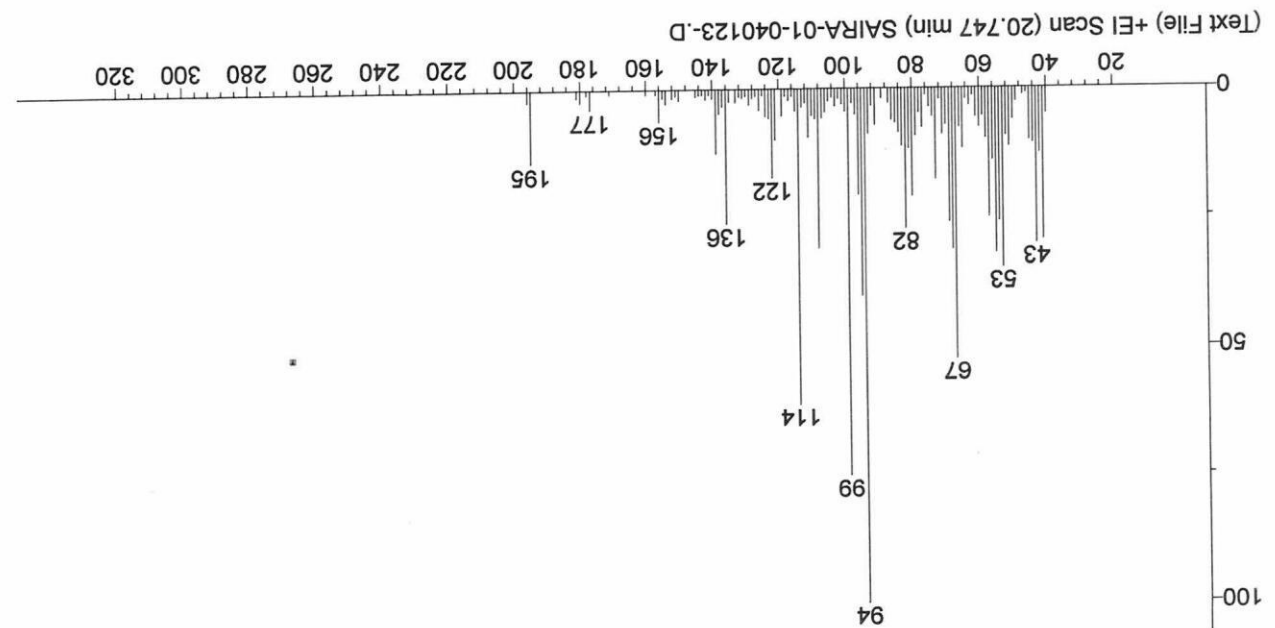

Name: Cyclohexanepropanoic acid, 3,4-dihydroxy-

Formula: C<sub>9</sub>H<sub>16</sub>O<sub>4</sub>

MW: 188 CAS#: 57231-21-7 NIST#: 68756 ID#: 57609 DB: mainlib

Other DBs: None

Contributor: R.SELF FOOD RESEARCH INSTITUTE, NORWICH, U.K.

10 largest peaks:

94 999 | 95 565 | 81 562 | 136 513 | 57 498 | 41 488 | 55 481 | 43 319 | 67 303 | 69 296 |

Synonyms:

1.3-(3,4-Dihydroxycyclohexyl)propanoic acid #

Estimated non-polar retention index (n-alkane scale):

Value: 1712 iu

Confidence interval (Diverse functional groups): 89(50%) 382(95%) iu



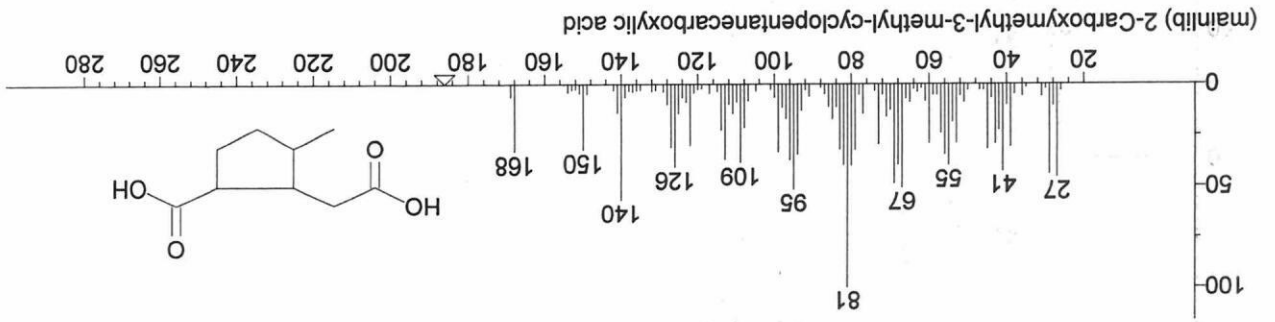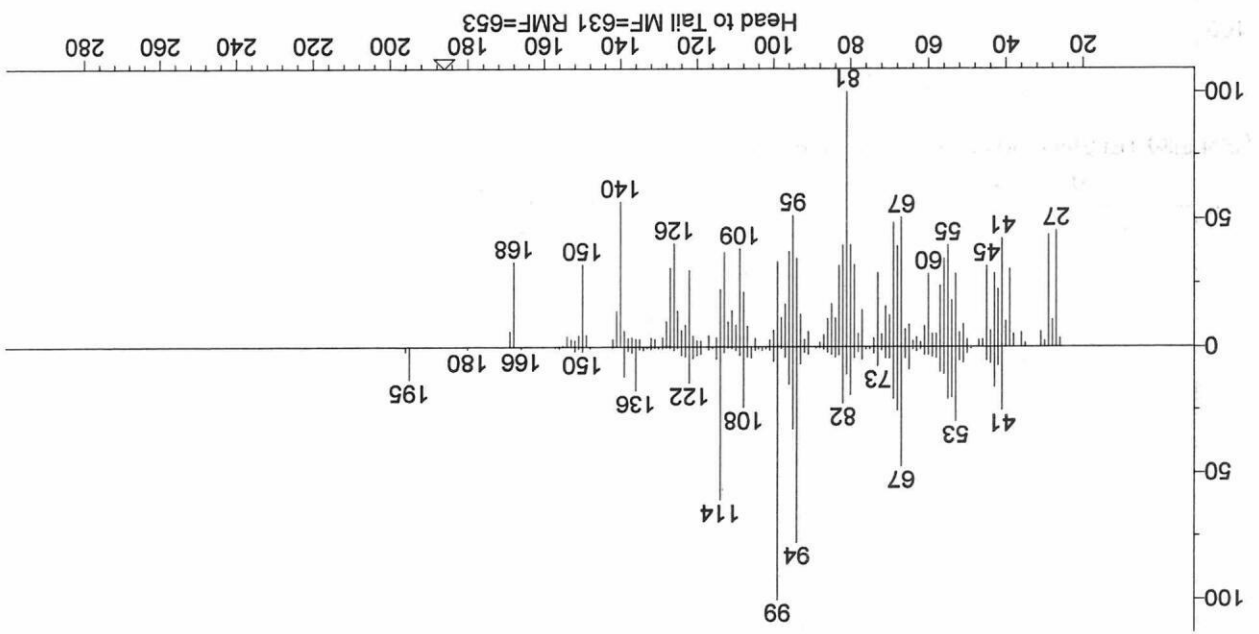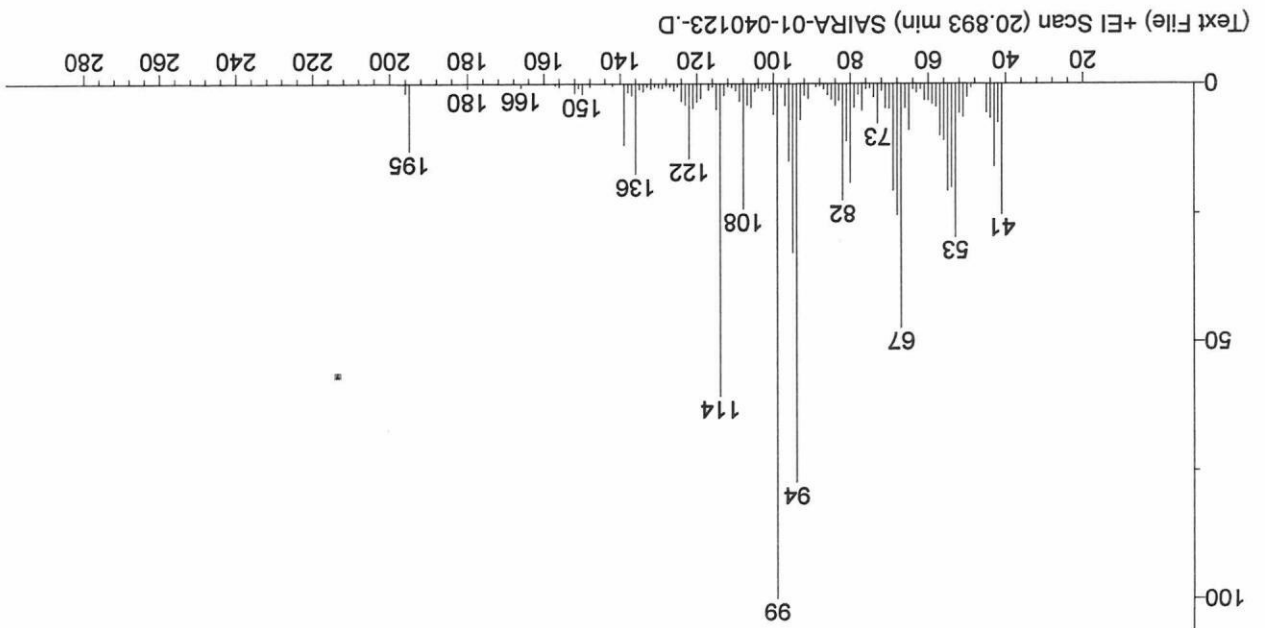

Name: 2-Carboxymethyl-3-methyl-cyclopentanecarboxylic acid

Formula:  $C_9H_{14}O_4$

MW: 186 NIST#: 186612 ID#: 43577 DB: mainlib

Contributor: Chemical Concepts

10 largest peaks:

81 999 | 140 565 | 95 513 | 67 505 | 69 485 | 27 454 | 29 438 | 41 424 | 126 404 | 80 398 |

Synonyms:

no synonyms.

Estimated non-polar retention index (n-alkane scale):

Value: 1595 iu

Confidence interval (Carboxylic acids): 51(50%) 220(95%) iu

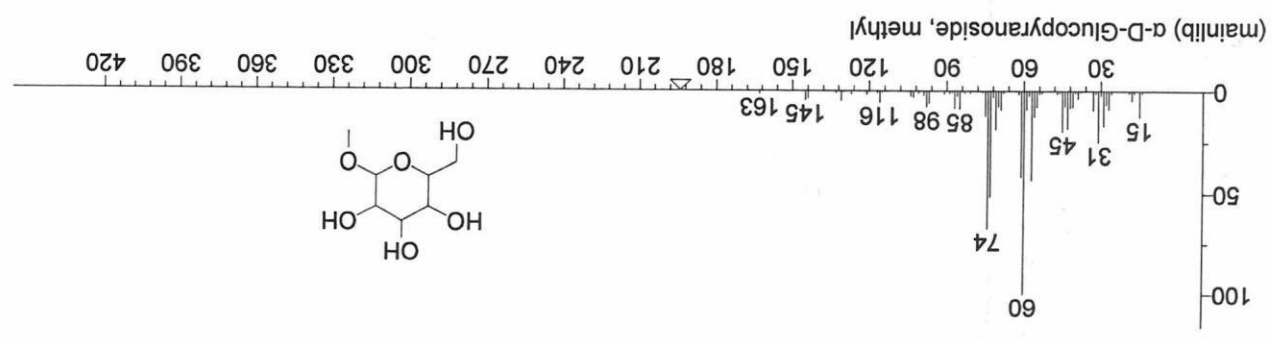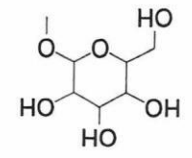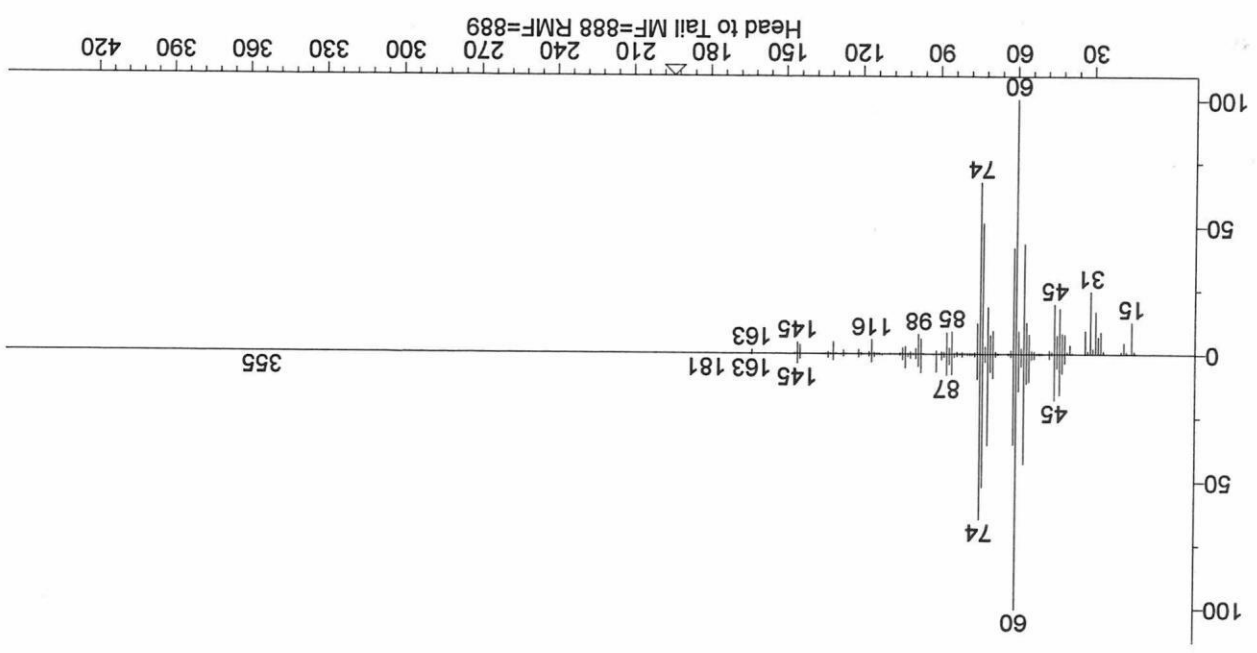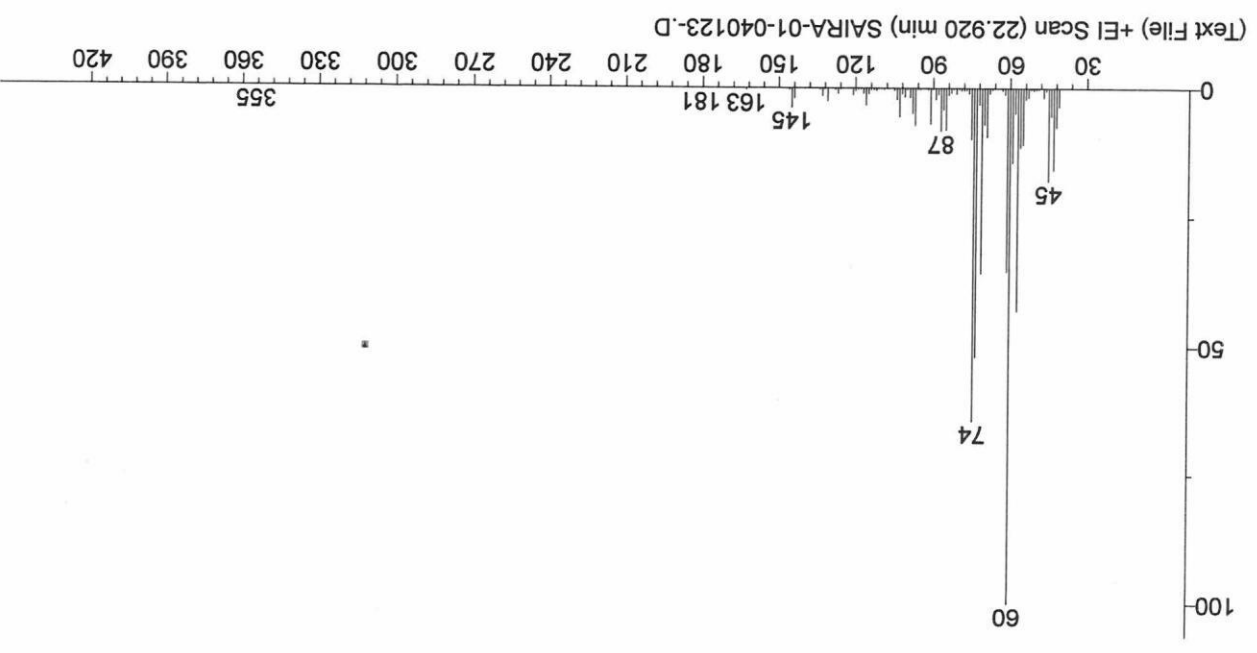

Name:  $\alpha$ -D-Glucopyranoside, methyl

Formula: C<sub>7</sub>H<sub>14</sub>O<sub>6</sub>

MW: 194 CAS#: 97-30-3 NIST#: 229366 ID#: 27200 DB: mainlib

Other DBs: TSCA, HODOC, NIH, EINECS

Contributor: Japan AIST/NIMC Database- Spectrum MS-NW- 635

10 largest peaks:

60 999 | 74 671 | 73 512 | 57 432 | 61 416 | 31 245 | 45 195 | 71 185 | 43 179 | 29 167 |

Synonyms:

1. Glucopyranoside, methyl,  $\alpha$ -D-
2.  $\alpha$ -Methylglucoside
3. Methyl  $\alpha$ -D-glucopyranoside
4. Methyl  $\alpha$ -D-glucoside
5.  $\alpha$ -d-Methylglucopyranoside
6.  $\alpha$ -Methyl D-glucose ether
7. Methyl hexopyranoside #

Estimated non-polar retention index (n-alkane scale):

Value: 1714 iu

Confidence interval (Diverse functional groups): 89(50%) 382(95%) iu

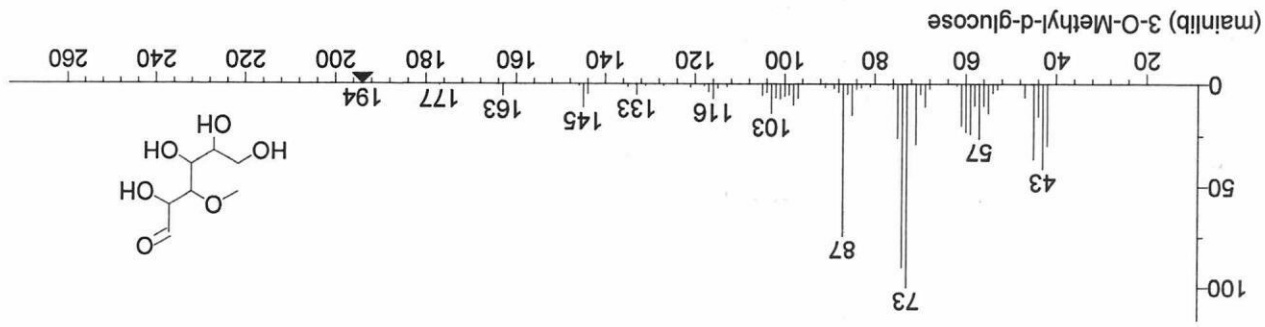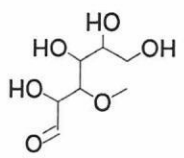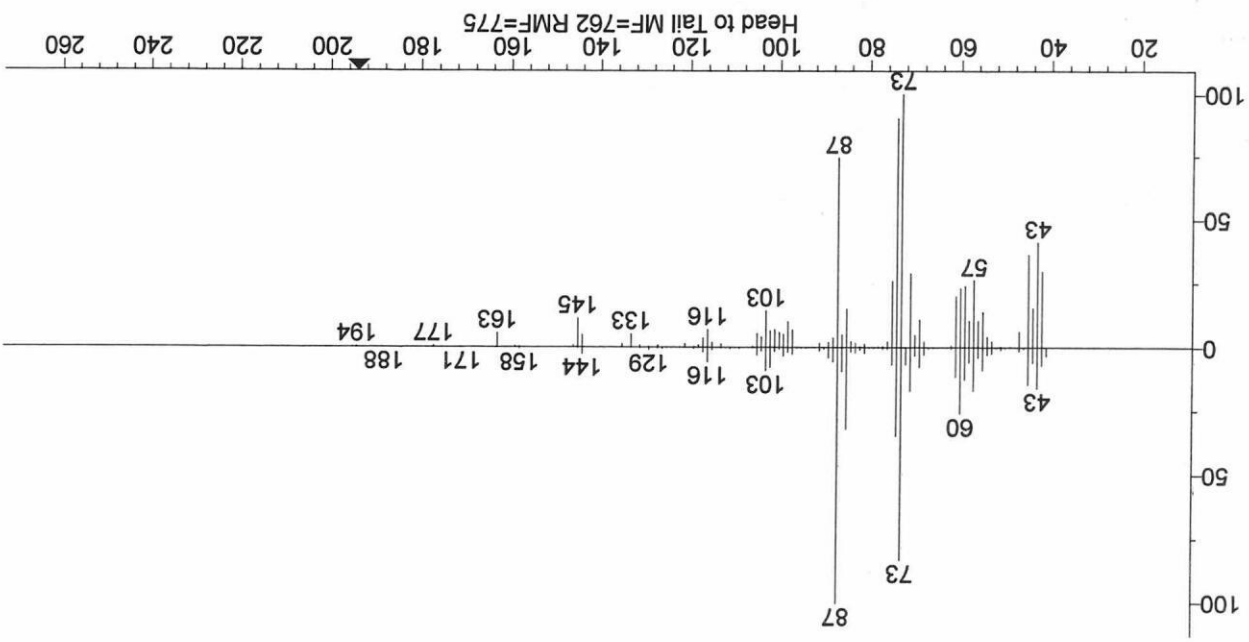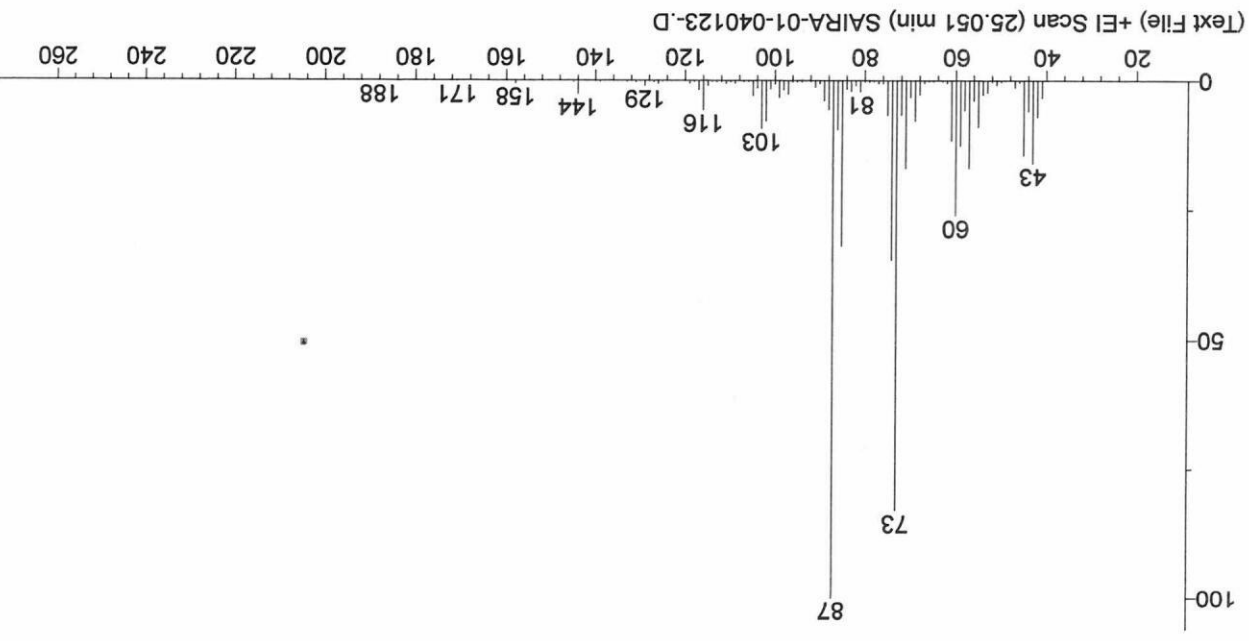

Name: 3-O-Methyl-d-glucose

Formula: C<sub>7</sub>H<sub>14</sub>O<sub>6</sub>

MW: 194 NIST#: 127259 ID#: 35456 DB: mainlib

Contributor: LAC, NIDDK, NIH, Bethesda, MD 20892

10 largest peaks:

73 999 | 74 900 | 87 743 | 43 411 | 45 363 | 42 298 | 71 290 | 57 262 | 75 259 | 59 239 |

Synonyms:

no synonyms.

Estimated non-polar retention index (n-alkane scale):

Value: 1647 iu

Confidence interval (Diverse functional groups): 89(50%) 382(95%) iu

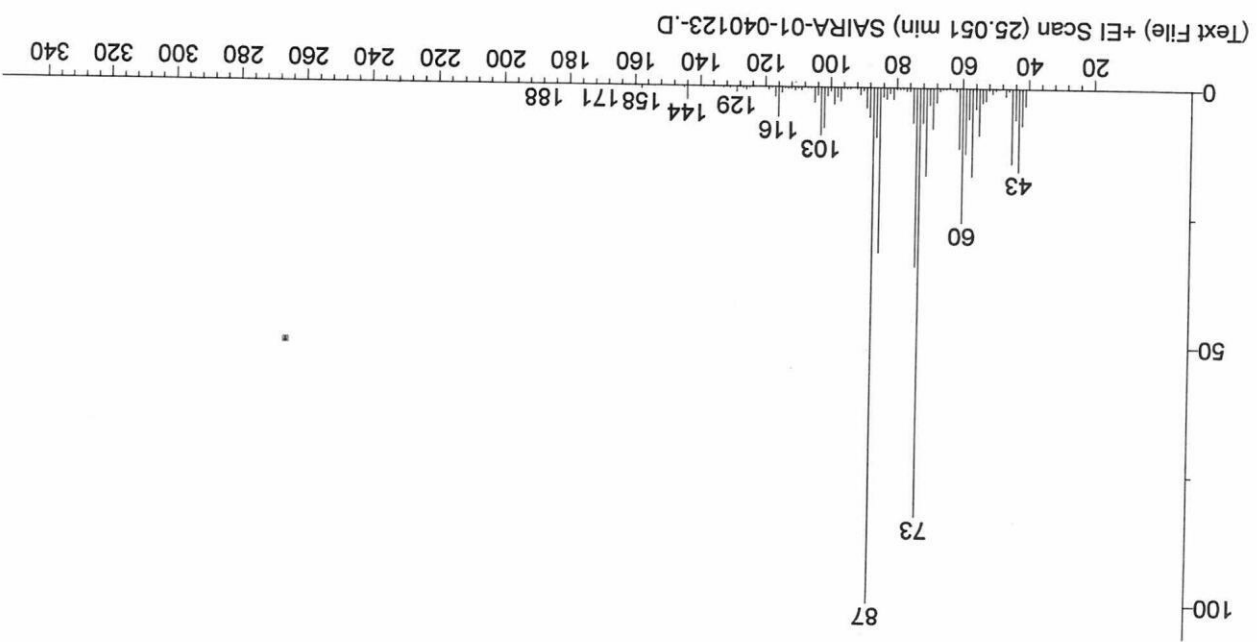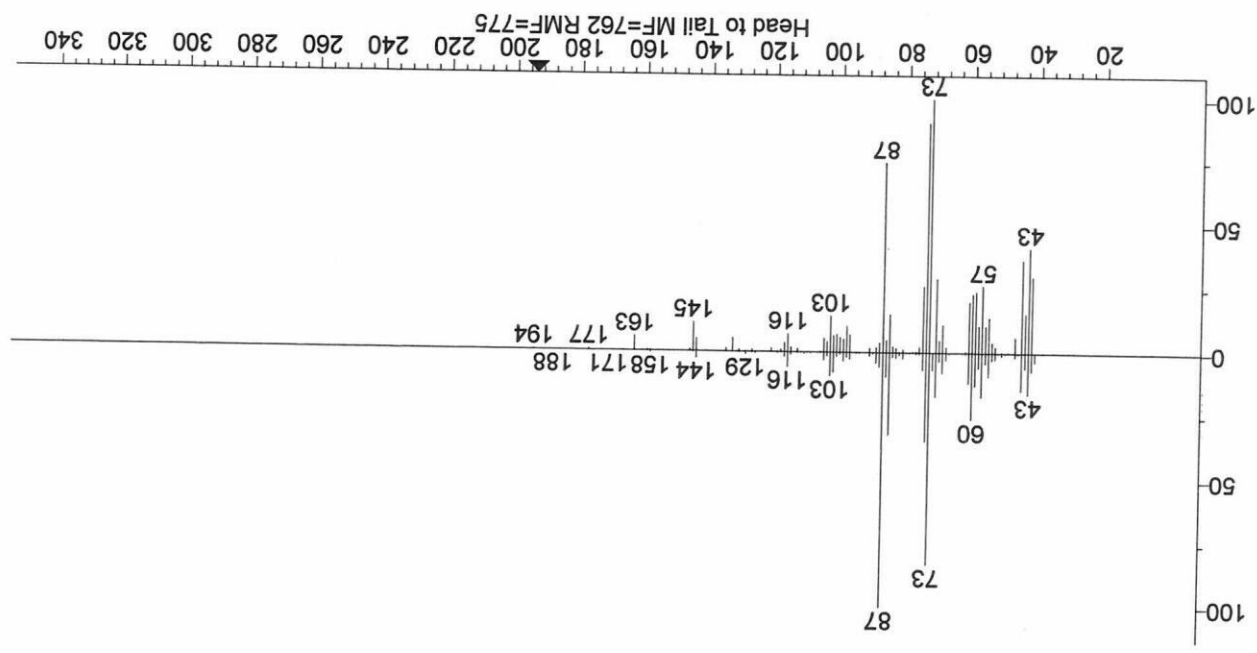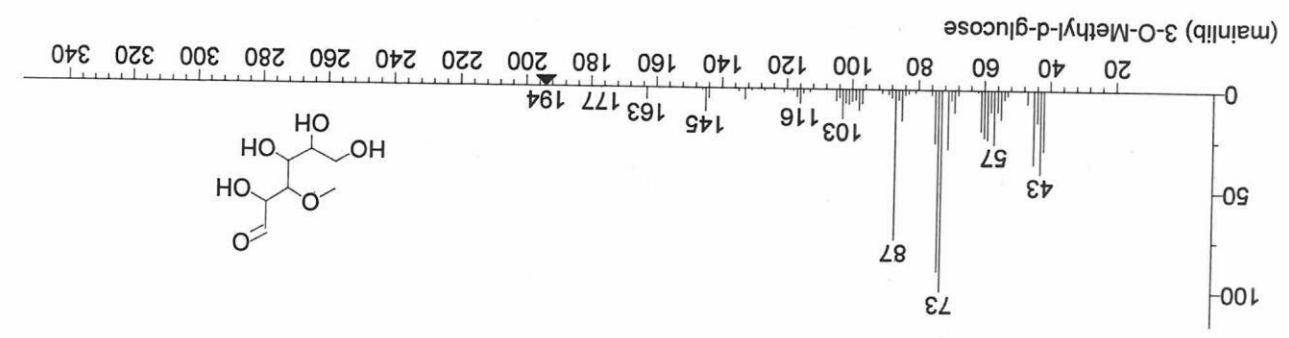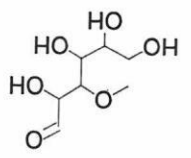

Name: 3-O-Methyl-d-glucose

Formula: C<sub>7</sub>H<sub>14</sub>O<sub>6</sub>

MW: 194 NIST#: 127259 ID#: 35456 DB: mainlib

Contributor: LAC, NIDDK, NIH, Bethesda, MD 20892

10 largest peaks:

73 999 | 74 900 | 87 743 | 43 411 | 45 363 | 42 298 | 71 290 | 57 262 | 75 259 | 59 239 |

Synonyms:

no synonyms.

Estimated non-polar retention index (n-alkane scale):

Value: 1647 iu

Confidence interval (Diverse functional groups): 89(50%) 382(95%) iu



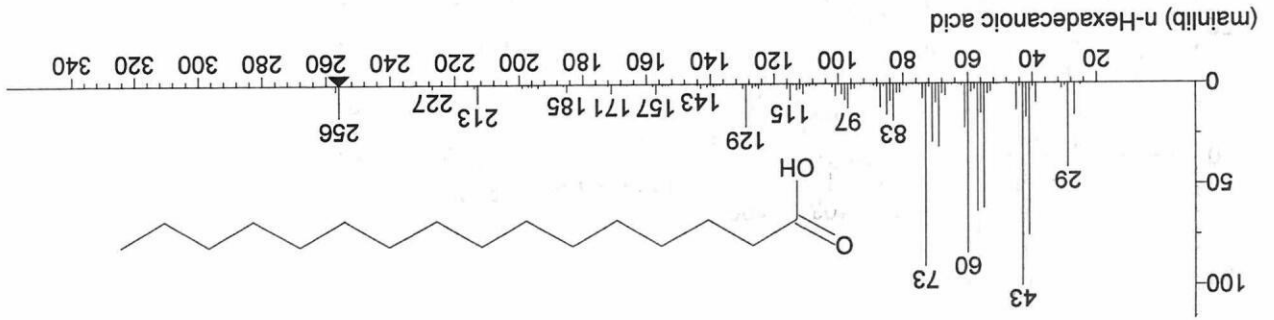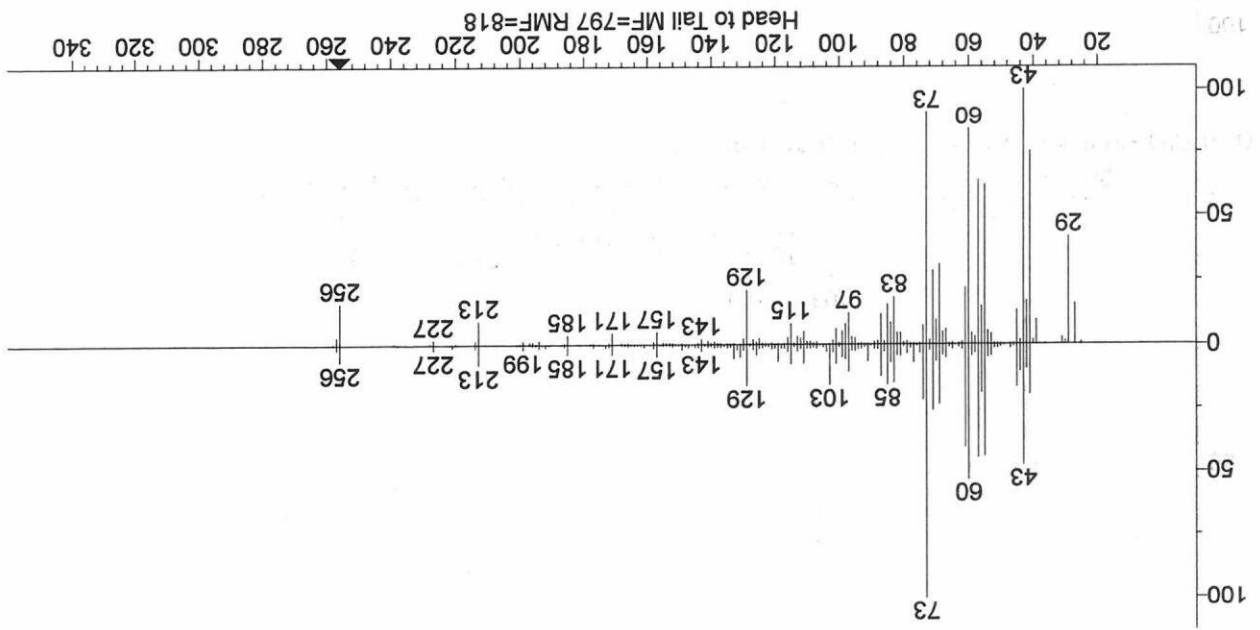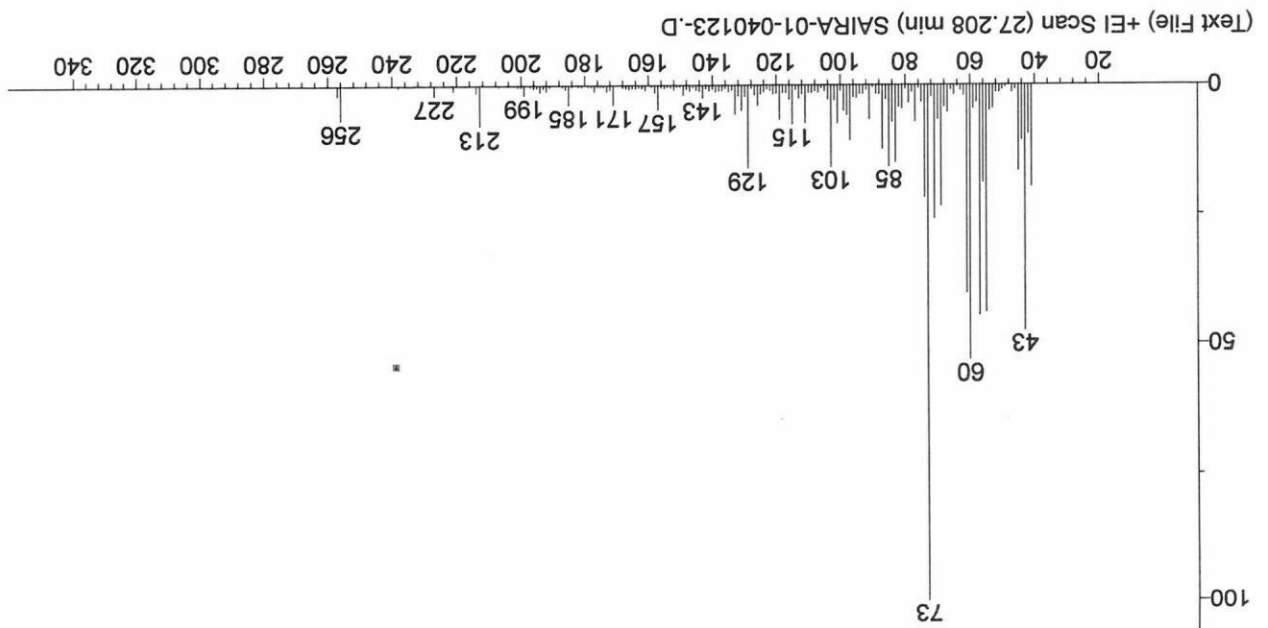

Name: n-Hexadecanoic acid

Formula: C<sub>16</sub>H<sub>32</sub>O<sub>2</sub>

MW: 256 CAS#: 57-10-3 NIST#: 151973 ID#: 8479 DB: mainlib

Other DBs: Fine, TSCA, RTECS, EPA, HODOC, NIH, EINECS, IRDB

Contributor: Chemical Concepts

10 largest peaks:

43 999 | 73 905 | 60 838 | 41 749 | 57 634 | 55 616 | 29 414 | 69 310 | 71 285 | 61 218 |

Synonyms:

1.Hexadecanoic acid

2.n-Hexadecoic acid

3.Palmitic acid

4.Pentadecanecarboxylic acid

5.1-Pentadecanecarboxylic acid

6.Cetylic acid

7.Emersol 140

8.Emersol 143

9.Hexadecylic acid

10.Hydrofol

11.Hystrene 8016

12.Hystrene 9016

13.Industrane 4516

14.Prifrac 2960

15.Glycon P-45

16.Prifac 2960

17.Univol U332

Estimated non-polar retention index (n-alkane scale):

Value: 1968 iu

Confidence interval (Carboxylic acids): 51(50%) 220(95%) iu

Retention index.

1. Value: 1942 iu

Column Type: Capillary

Column Class: Standard non-polar

Active Phase: RTX-1

Column

Length: 60 m

Carrier Gas: He

Column Diameter: 0.22 mm

Phase Thickness: 0.25 um

Data Type: Linear

RI

Program Type: Ramp

Start T: 60 C

End T: 230 C

Heat Rate: 2 K/min

End Time: 35 min

Source: Paolini, J.;

Muselli, A.; Bernardini, A.-F.; Bighelli, A.; Casanova, J.; Costa, J., Thymol derivatives from essential oil of *Doronicum corsicum* L., *Flavour Fragr. J.*, 22, 2007, 479-487.

2. Value: 1972 iu

Column Type: Capillary

Column

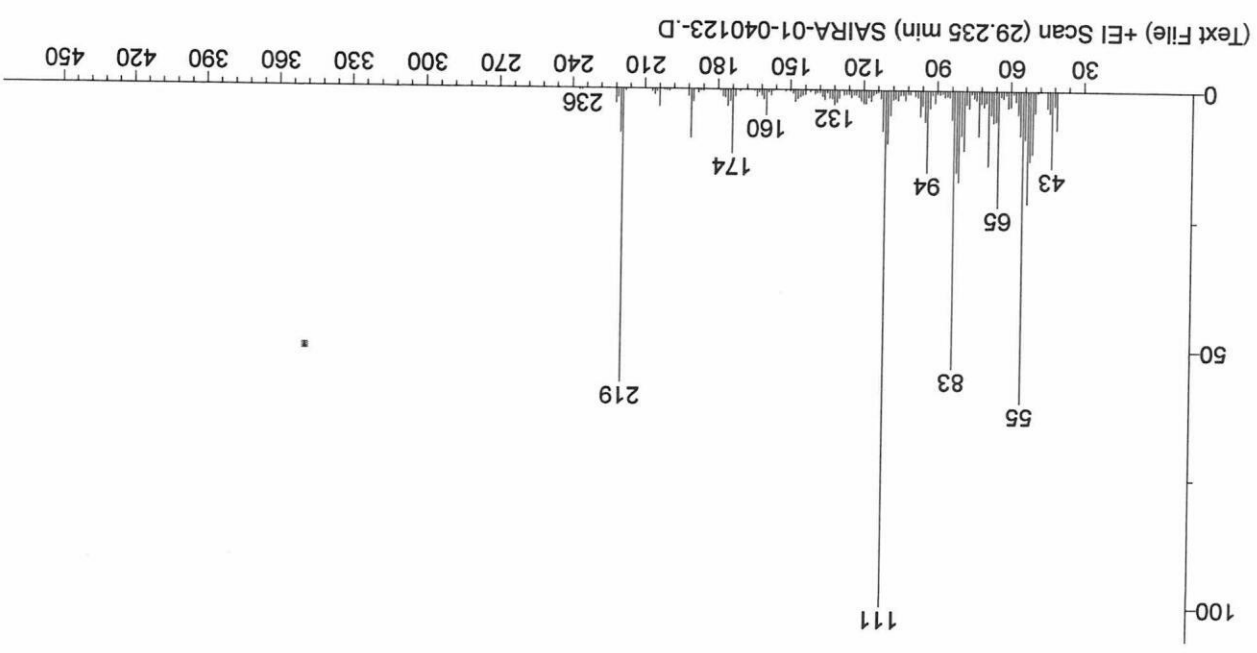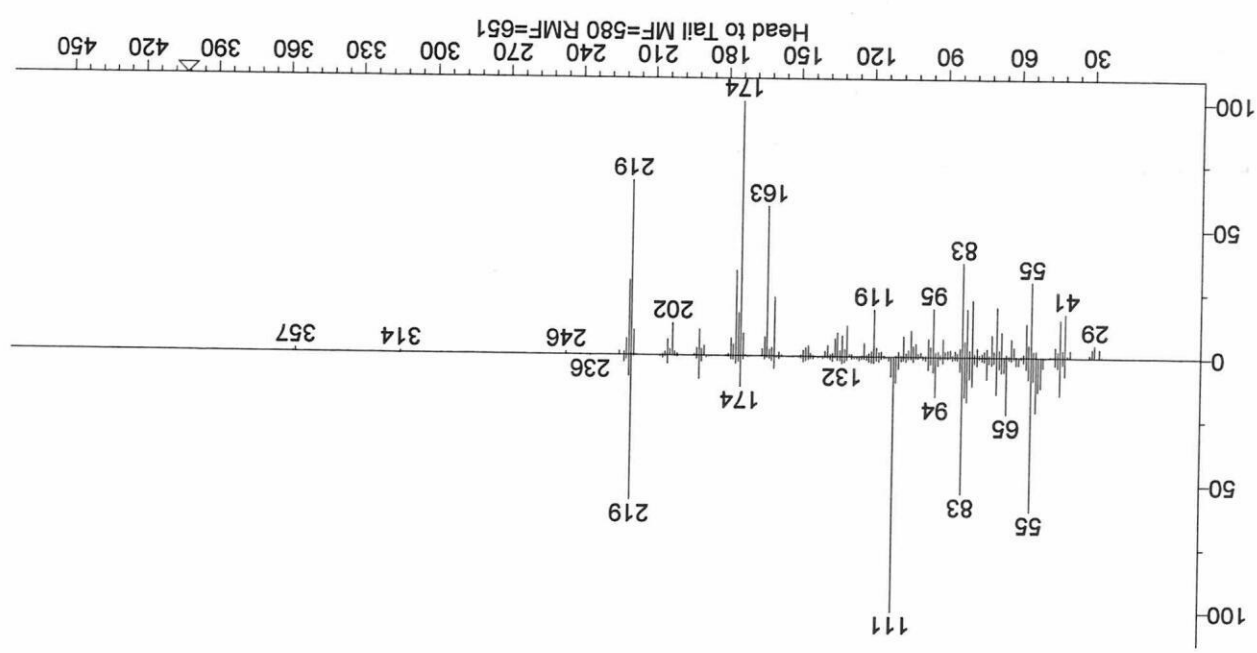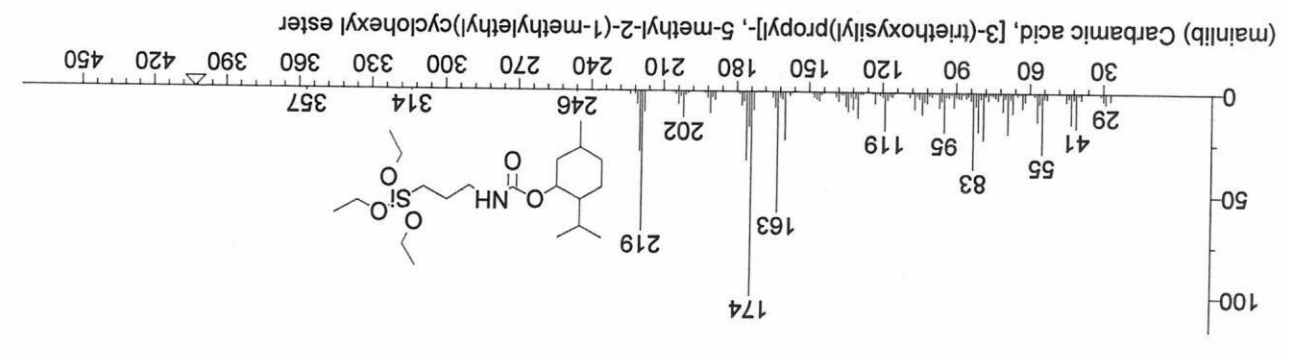

Name: Carbamic acid, [3-(triethoxysilyl)propyl]-, 5-methyl-2-(1-methylethyl)cyclohexyl ester

Formula: C<sub>20</sub>H<sub>41</sub>NO<sub>5</sub>Si

MW: 403 CAS#: 68479-61-8 NIST#: 73759 ID#: 129958 DB: mainlib

Other DBs: TSCA, EINECS

Contributor: RADIAN CORP

10 largest peaks:

174 999 | 219 681 | 163 584 | 83 369 | 176 333 | 55 295 | 220 295 | 160 230 | 79 224 | 69 197 |

Synonyms:

1. Menthyl N-(3-triethoxysilylpropyl)carbamate

2. 2-Isopropyl-5-methylcyclohexyl 3-(triethoxysilyl)propylcarbamate #

Estimated non-polar retention index (n-alkane scale):

Value: 2436 iu

Confidence interval (Diverse functional groups): 89(50%) 382(95%) iu

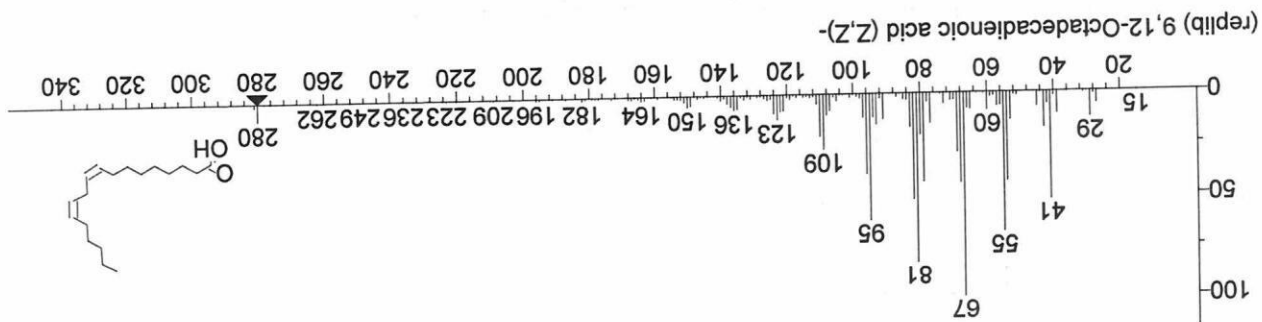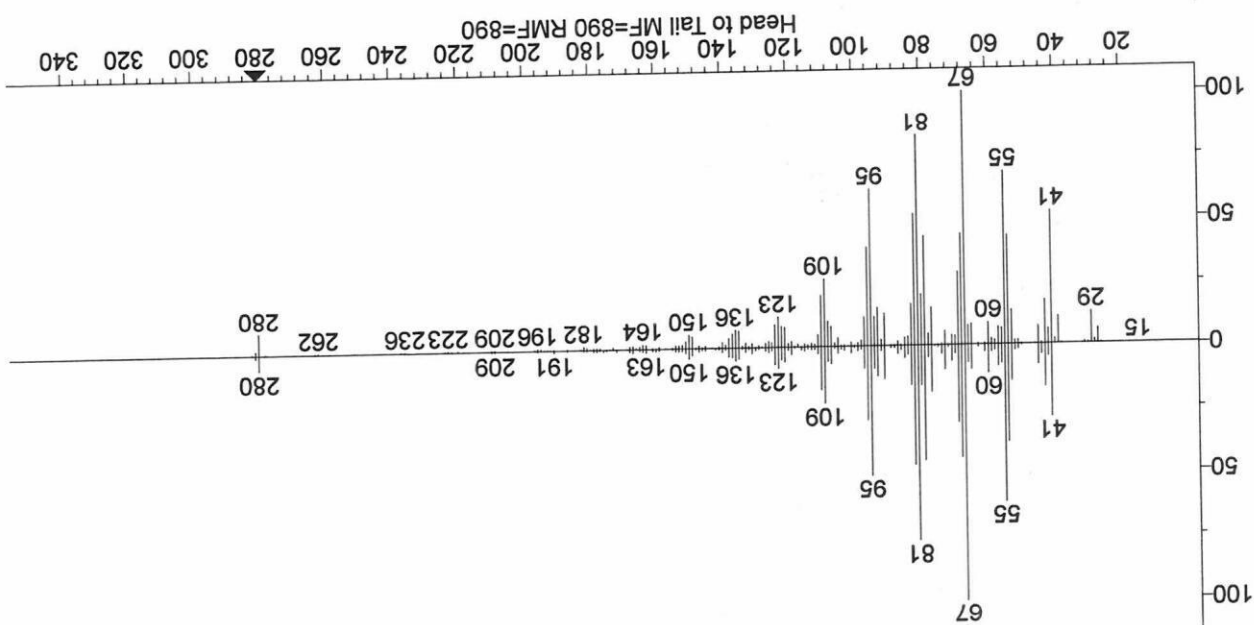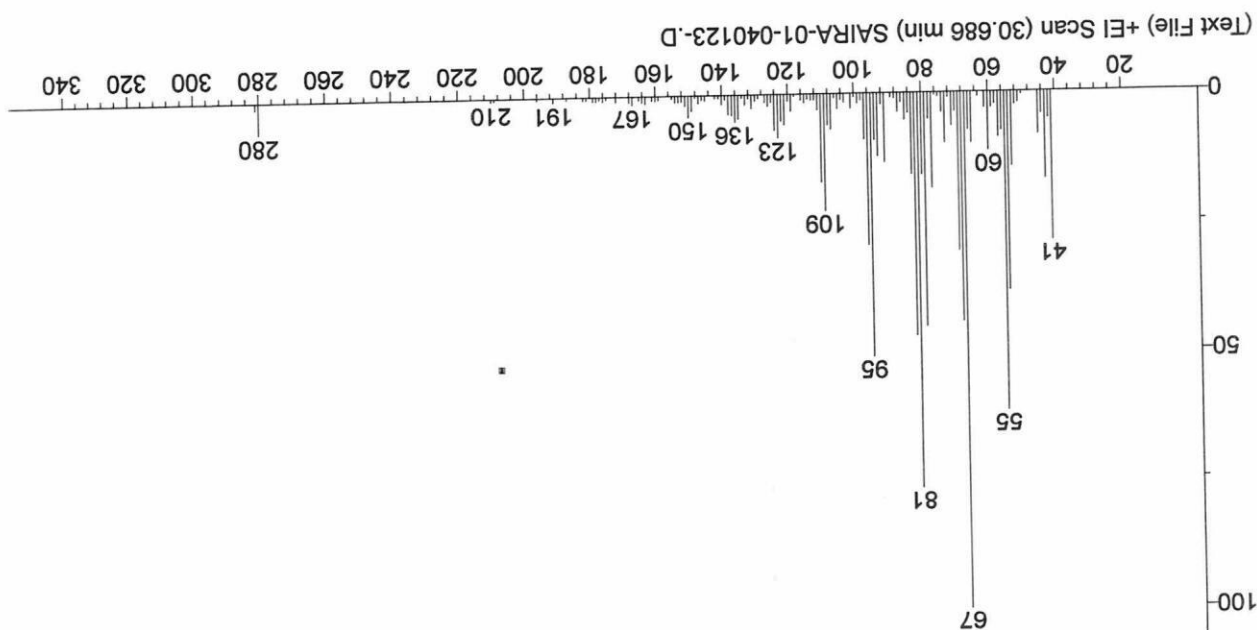

Name: 9,12-Octadecadienoic acid (Z,Z)-

Formula: C<sub>18</sub>H<sub>32</sub>O<sub>2</sub>

MW: 280 CAS#: 60-33-3 NIST#: 333207 ID#: 7212 DB: replib

Other DBs: Fine, TSCA, RTECS, HODOC, NIH, EINECS

Contributor: NIST Mass Spectrometry Data Center

10 largest peaks:

67 999 | 81 827 | 55 680 | 95 617 | 41 523 | 82 516 | 68 437 | 79 430 | 54 429 | 96 388 |

Synonyms:

1. cis-9,cis-12-Octadecadienoic acid
2. cis,cis-Linoleic acid
3. Grape seed oil
4. Linoleic
5. Linoleic acid
6. Linolic acid
7. Polylin No. 515
8. Telfairic acid
9. Unifac 6550
10. 9,12-Octadecadienoic acid
11. Leinoleic acid
12. 9,12-Linoleic acid
13. cis,cis-9,12-octadecadienoic acid
14. Linoelaidic acid
15. Linoleic acid 95
16. Emersol 310
17. Emersol 315
18. *Vespula pensylvanica* b708568k063
19. Pamolyn
20. Pamolyn 125
21. Pamolyn 200, 240
22. Pamolyn 380

Estimated non-polar retention index (n-alkane scale):

Value: 2183 iu

Confidence interval (Carboxylic acids): 51(50%) 220(95%) iu

Retention index.

1. Value: 2095 iu

Column Type: Capillary

Column Class: Standard non-polar

Active Phase: CP Sil 5 CB

Column

Length: 25 m

Carrier Gas: H<sub>2</sub>

Column Diameter: 0.25 mm

Data Type: Linear RI

Program Type: Ramp

Start T:

80 C

End T: 270 C

Heat Rate: 10 K/min

Source: Ziegenbein, F.C.; Hanssen, H.-P.; König, W.A., Secondary metabolites from *Ganoderma lucidum* and *Spongiporus leucomallellus*, *Phytochemistry*, 67, 2006, 202-211.

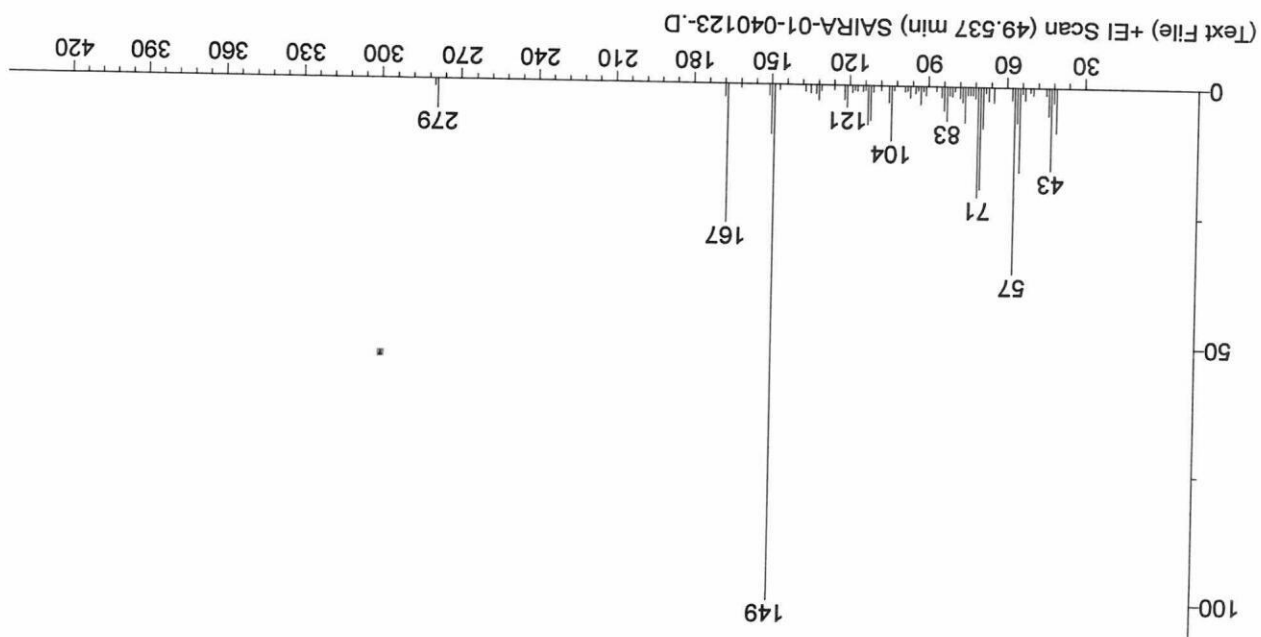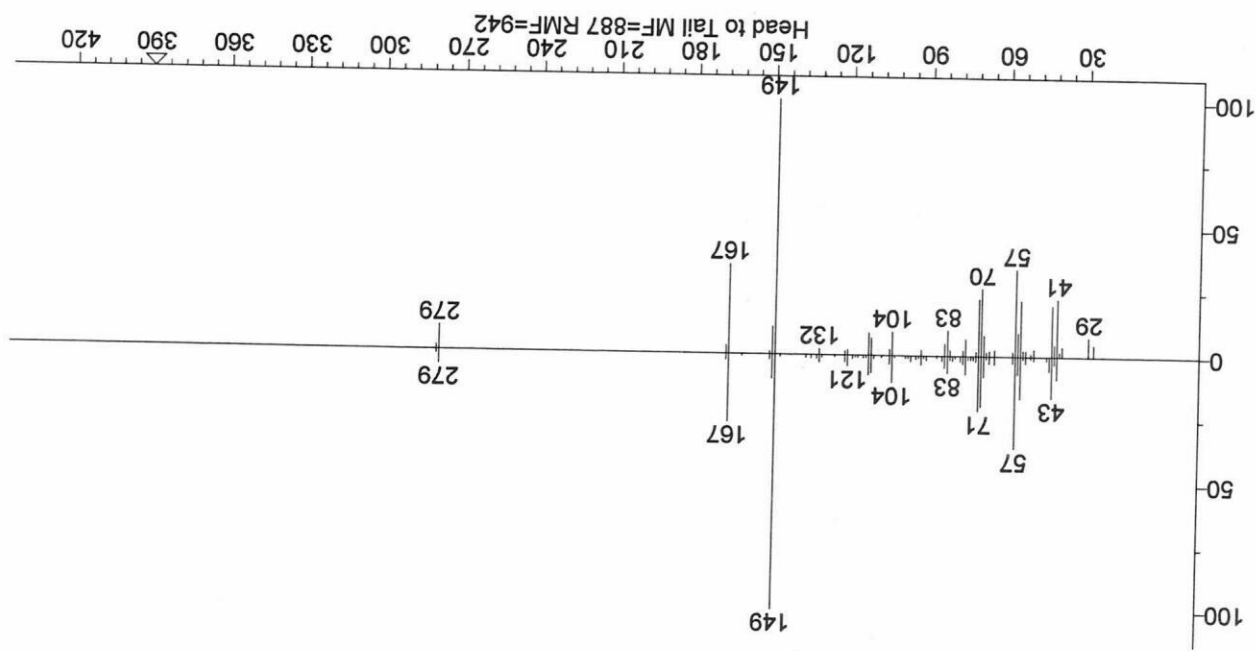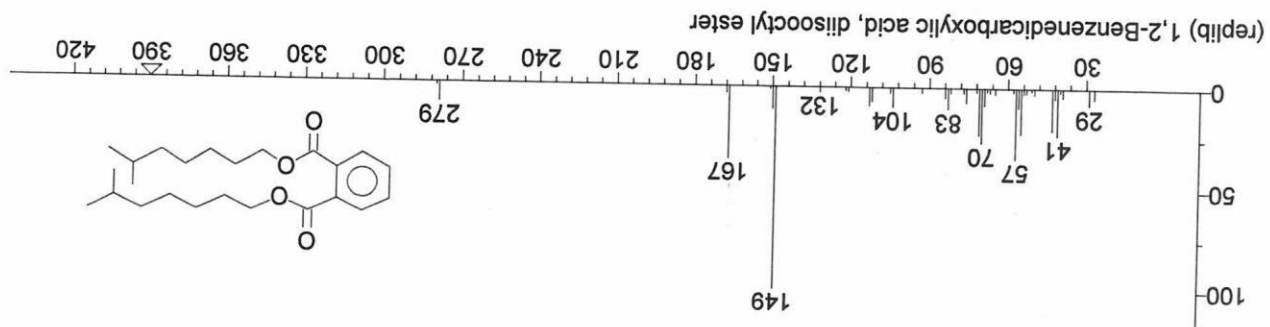

Name: 1,2-Benzenedicarboxylic acid, diisooctyl ester

Formula: C<sub>24</sub>H<sub>38</sub>O<sub>4</sub>

MW: 390 CAS#: 27554-26-3 NIST#: 113206 ID#: 20061 DB: replib

Other DBs: Fine, TSCA, RTECS, EINECS, IRDB

Contributor: NIST Mass Spectrometry Data Center, 1990.

10 largest peaks:

149 999 | 167 350 | 57 341 | 70 264 | 41 225 | 71 224 | 55 218 | 43 200 | 150 107 | 83 100 |

Synonyms:

1. Diisooctyl phthalate
2. Hexaplas M/O
3. Isooctyl phthalate
4. Corflex 880
5. DIOP
6. Flexol plasticizer diop
7. Morflex 100
8. Palatinol D10
9. Phthalic acid, bis(6-methylheptyl) ester
10. Phthalic acid, diisooctyl ester
11. Witcizer 313
12. Bis(6-methylheptyl) phthalate #

Estimated non-polar retention index (n-alkane scale):

Value: 2704 iu

Confidence interval (Esters): 47(50%) 201(95%) iu



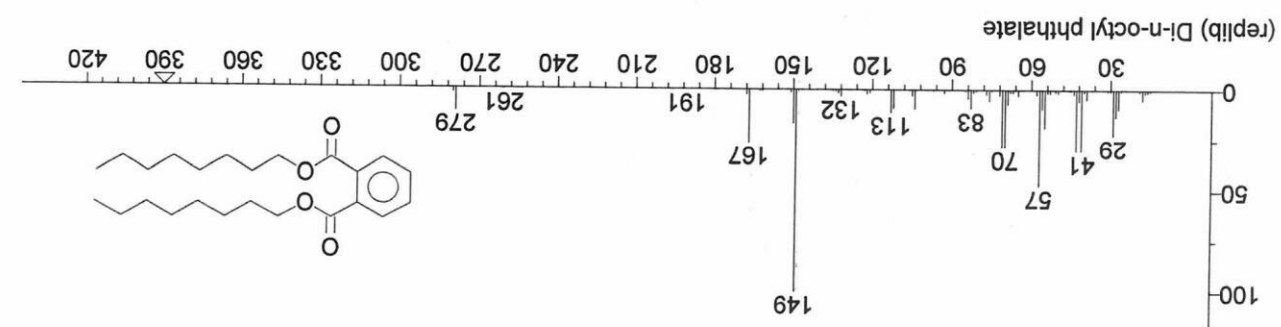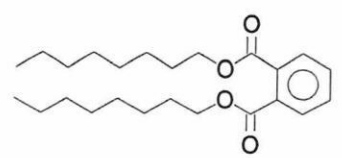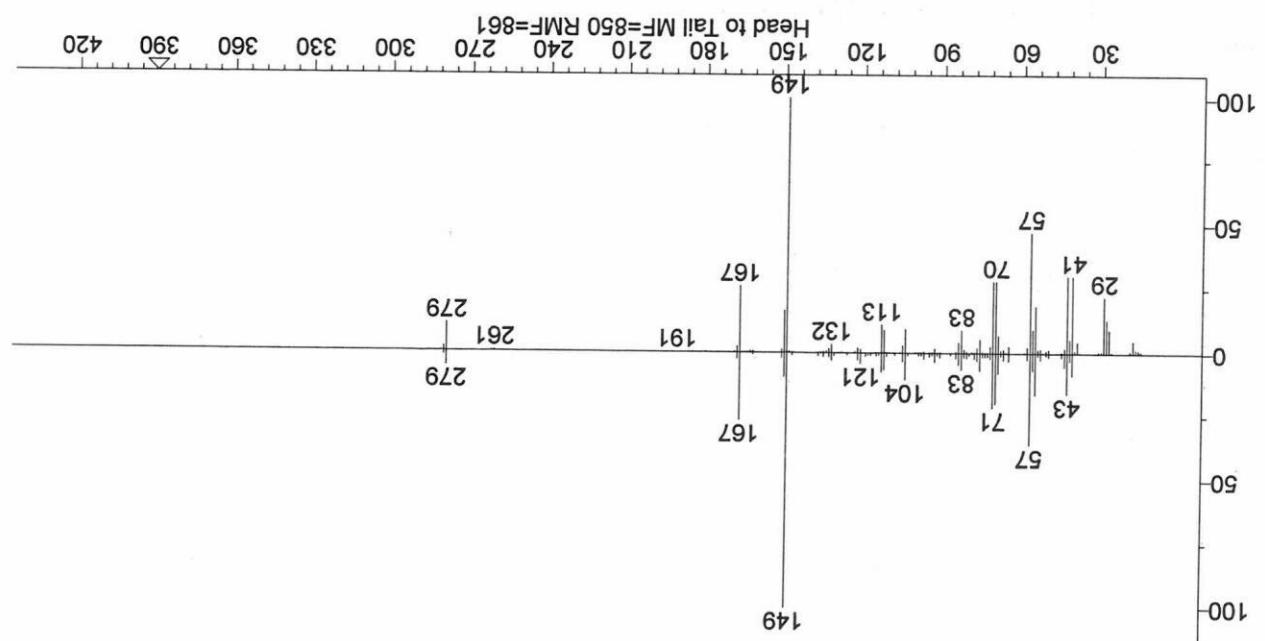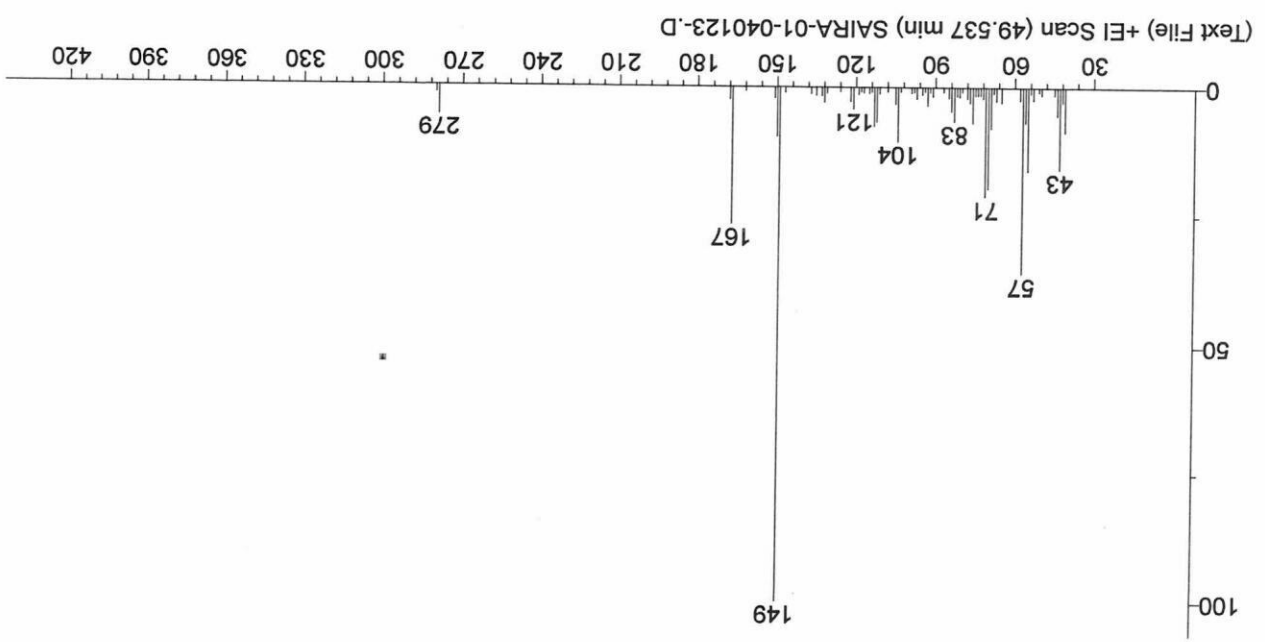

Name: Di-n-octyl phthalate

Formula: C<sub>24</sub>H<sub>38</sub>O<sub>4</sub>

MW: 390 CAS#: 117-84-0 NIST#: 23606 ID#: 19967 DB: replib

Other DBs: Fine, TSCA, RTECS, EPA, HODOC, NIH, EINECS, IRDB

10 largest peaks:

149 999 | 57 470 | 41 300 | 43 300 | 70 280 | 71 280 | 167 260 | 29 220 | 55 185 | 150 165 |

Synonyms:

1.1,2-Benzenedicarboxylic acid, dioctyl ester

2.Phthalic acid, dioctyl ester

3.n-Octyl phthalate

4.Dinopol NOP

5.Dioctyl o-benzenedicarboxylate

6.Dioctyl phthalate

7.Octyl phthalate

8.Polycizer 162

9.1,2-Benzenedicarbonic acid, dioctyl ester

10.Dicapryl phthalate

11.Dioctyl 1,2-benzenedicarboxylate

12.Vinicizer 85

13.o-Benzenedicarboxylic acid, dioctyl ester

14.Celluflex dop

15.Dioctylester kyseliny ftalove

16.Dnop

17.PX-138

18.Rcra waste number U107

19.Dioctyl o-phthalate

Estimated non-polar retention index (n-alkane scale):

Value: 2832 iu

Confidence interval (Esters): 47(50%) 201(95%) iu

Retention index.

1. Value: 2682 iu

Column Type: Capillary

Column Class: Standard non-polar

Active Phase: OV-101

Column

Length: 50 m

Carrier Gas: H<sub>2</sub>

Column Diameter: 0.3 mm

Phase Thickness: 0.35 µm

Data Type: Kovats

RI

Program Type: Isothermal

Start T: 230 C

Source: Friocourt, M.P.; Berthou, F.; Picart, D.; Dreano, Y.; Floch, H.

H., Glass Capillary Column Gas Chromatography of Phthalate Esters, J. Chromatogr., 172, 1979, 261-271.

2.

Value: 2685 iu

Column Type: Capillary

Column Class: Standard non-polar

Active Phase: SE-30

Column Length:

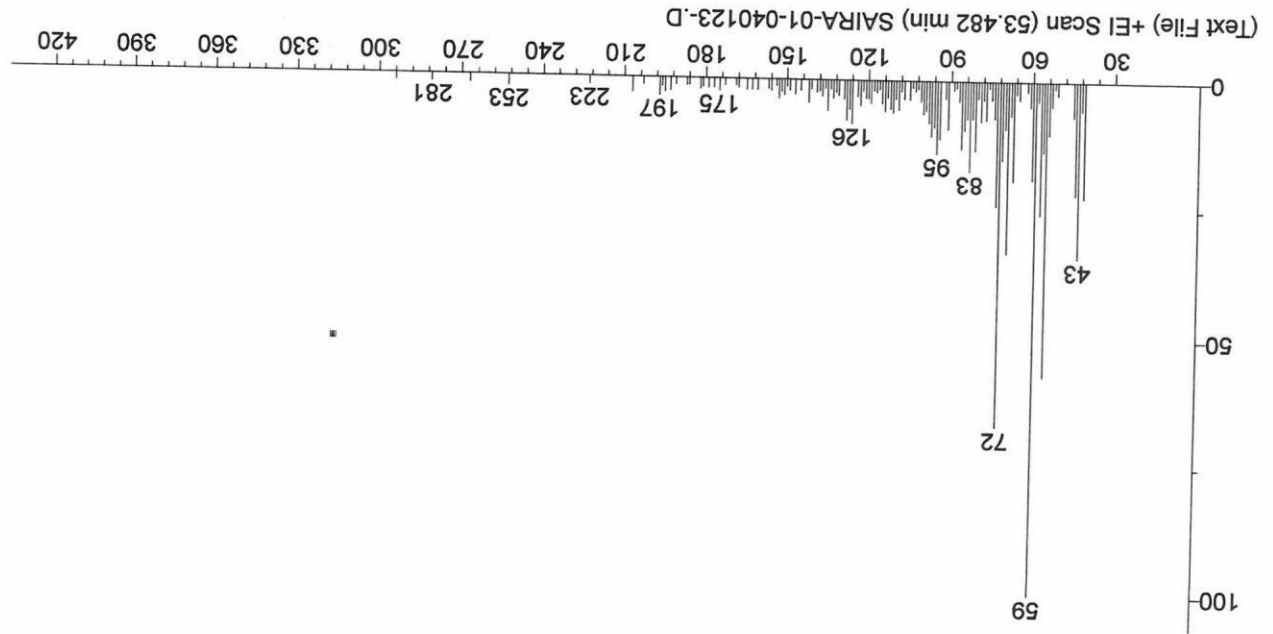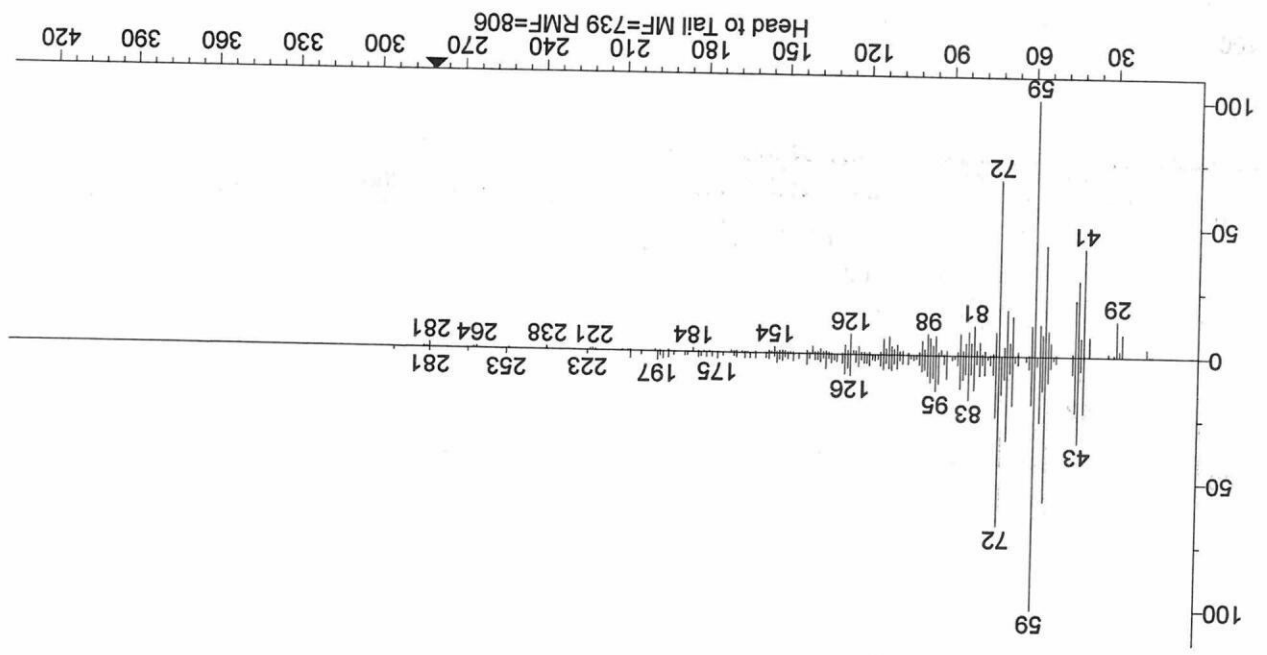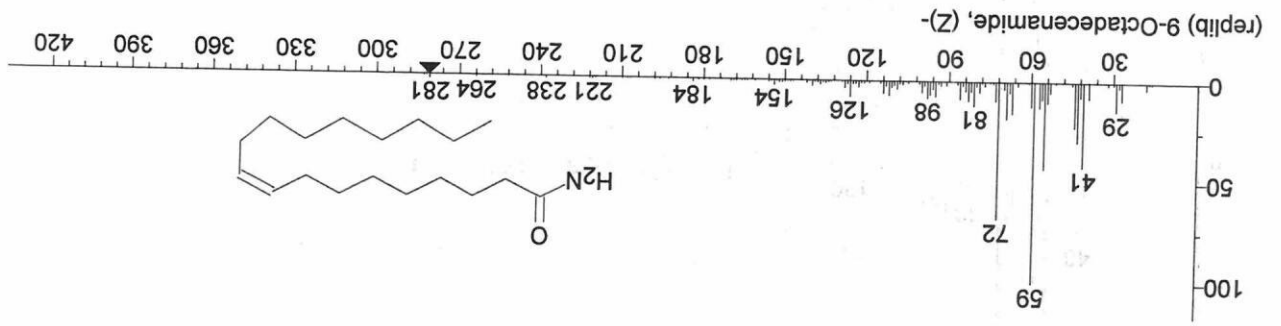

Name: 9-Octadecenamide, (Z)-

Formula: C<sub>18</sub>H<sub>35</sub>NO

MW: 281 CAS#: 301-02-0 NIST#: 334156 ID#: 6574 DB: replib

Other DBs: Fine, TSCA, HODOC, NIH, EINECS

Contributor: Frank Antolasic, RMIT Applied Chemistry Department, Victoria Australia 3001

10 largest peaks:

59 999 | 72 680 | 55 430 | 41 419 | 43 295 | 44 220 | 69 181 | 67 154 | 29 140 | 57 125 |

Synonyms:

1. Adogen 73
2. Oleamide
3. Oleic acid amide
4. Oleyl amide
5. Slip-eze
6. Armoslip CP
7. Crodamide O
8. Crodamide OR
9. Amide O
10. Diamide O 200
11. Diamit O 200
12. (Z)-9-Octadecenamide
13. Aliphatic amide
14. Armid O
15. cis-9,10-Octadecenoamide
16. Crodamide O, OR
17. Kemamide O
18. Octadecene amide
19. Petrac Slip-Eze
20. Polydis TR 121
21. Unislip 1759
22. (9Z)-9-Octadecenamide #
23. 9-Octadecenamide

Estimated non-polar retention index (n-alkane scale):

Value: 2228 iu

Confidence interval (Nitrogen-containing): 83(50%) 356(95%) iu

Retention index.

1. Value: 2397 iu

Column Type: Capillary

Column Class: Semi-standard non-polar

Active Phase: HP-5

Column

Length: 30 m

Carrier Gas: He

Column Diameter: 0.25 mm

Phase Thickness: 0.25 µm

Data Type: Normal

alkane RI

Program Type: Complex

Description: 60C(5min) =>3C/min =>120C (2min) =>2C/min =>200C (2min)

=>3C/min =>320C

Source: Yasar, A.; Üçüncü, O.; Güleç, C.; Inceer, H.; Ayaz, S.; Yayh, N., GC-MS analysis of chloroform extracts in flowers, stems, and roots of *Tripleurospermum callosum*, *Pharm. Biol.*, 43(2), 2005, 108-112.

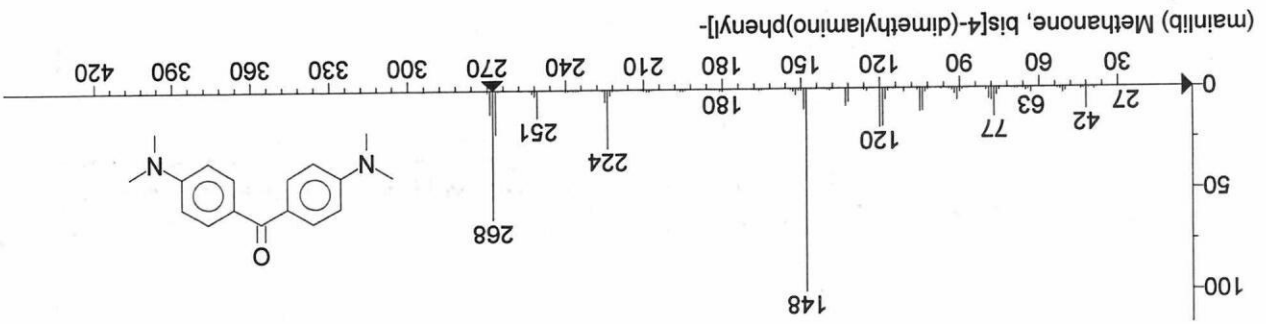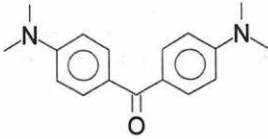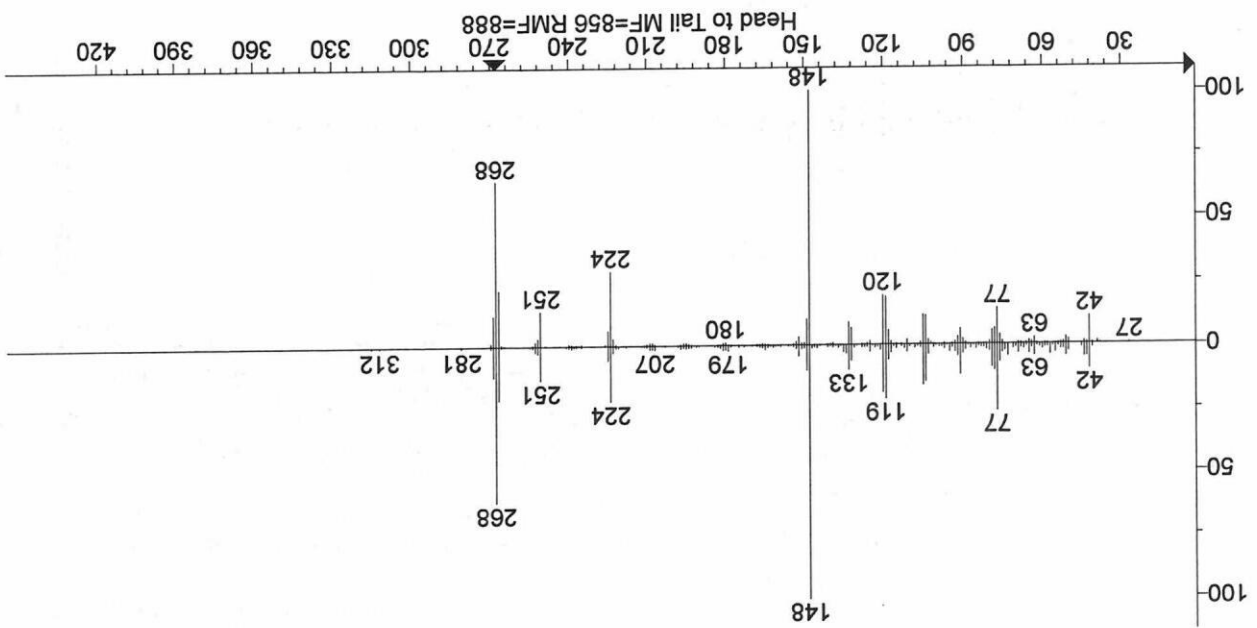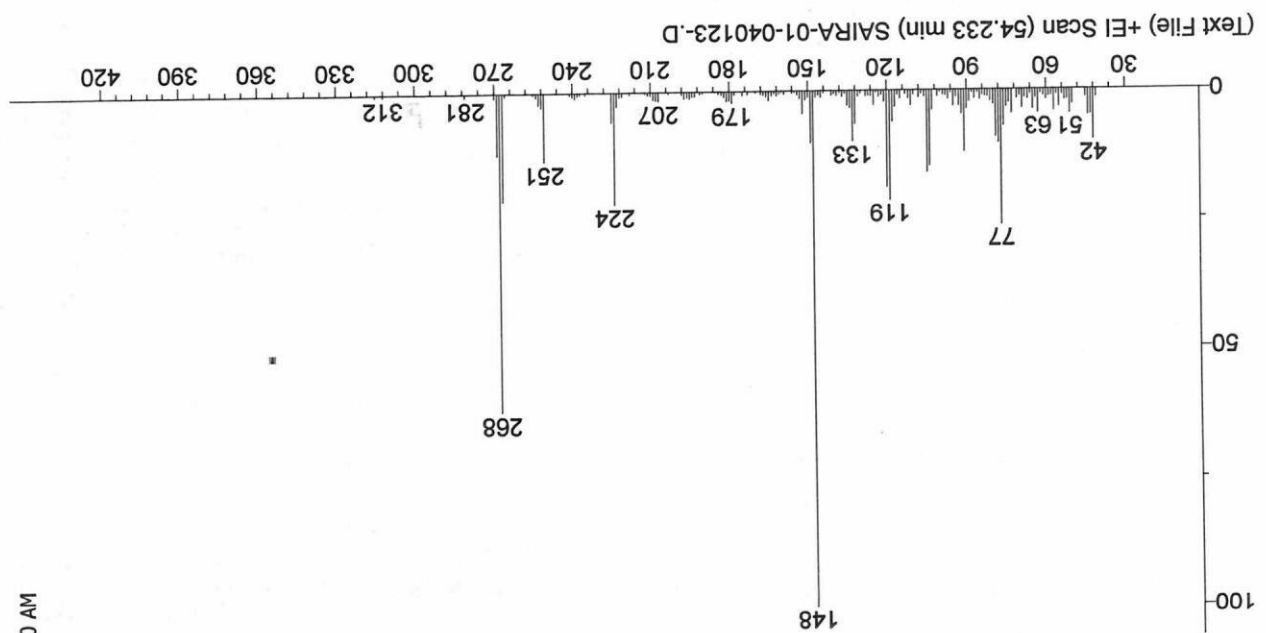

Name: Methanone, bis[4-(dimethylamino)phenyl]-

Formula: C<sub>17</sub>H<sub>20</sub>N<sub>2</sub>O

MW: 268 CAS#: 90-94-8 NIST#: 290948 ID#: 109402 DB: mainlib

Other DBs: Fine, TSCA, RTECS, EPA, HODOC, NIH, EINECS

Contributor: NIST Mass Spectrometry Data Center, 1998.

10 largest peaks:

148 999 | 268 637 | 224 288 | 267 216 | 120 191 | 119 186 | 77 140 | 251 135 | 269 117 | 105 114 |

Synonyms:

1. Benzophenone, 4,4'-bis(dimethylamino)-
2. p,p'-bis(Dimethylamino)benzophenone
3. Bis[p-(N,N-dimethylamino)phenyl] ketone
4. Michler's ketone
5. N,N,N',N'-Tetramethyl-4,4'-diaminobenzophenone
6. 4,4'-Bis(dimethylamino)benzophenone
7. 4,4'-di(Dimethylamino)benzophenone
8. Michlers ketone
9. p,p'-Tetramethyl-4,4'-diaminobenzophenone
10. (Tetramethyldiamino)benzophenone
11. p,p'-Bis(N,N-dimethylamino)benzophenone
12. p,p'-Michler's ketone
13. Michler ketone
14. NCI-C02006
15. Bis(4-(dimethylamino)phenyl)methanone
16. N,N'-Bisdimethylamino;benzophenone
17. Ketone base
18. Bis-4,4'-(dimethylamino)-benzophenon (michlers keton)
19. 4,4'-Bis(dimethylamino)-benzophenone

Estimated non-polar retention index (n-alkane scale):

Value: 2126 iu

Confidence interval (Diverse functional groups): 89(50%) 382(95%) iu

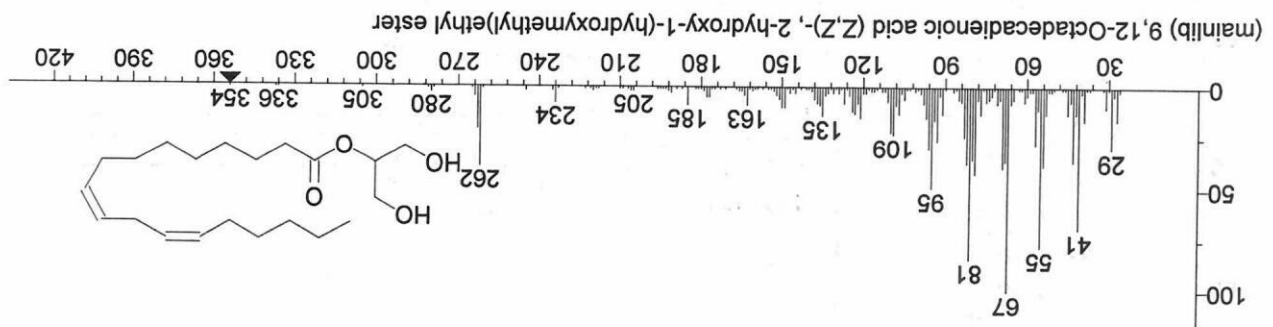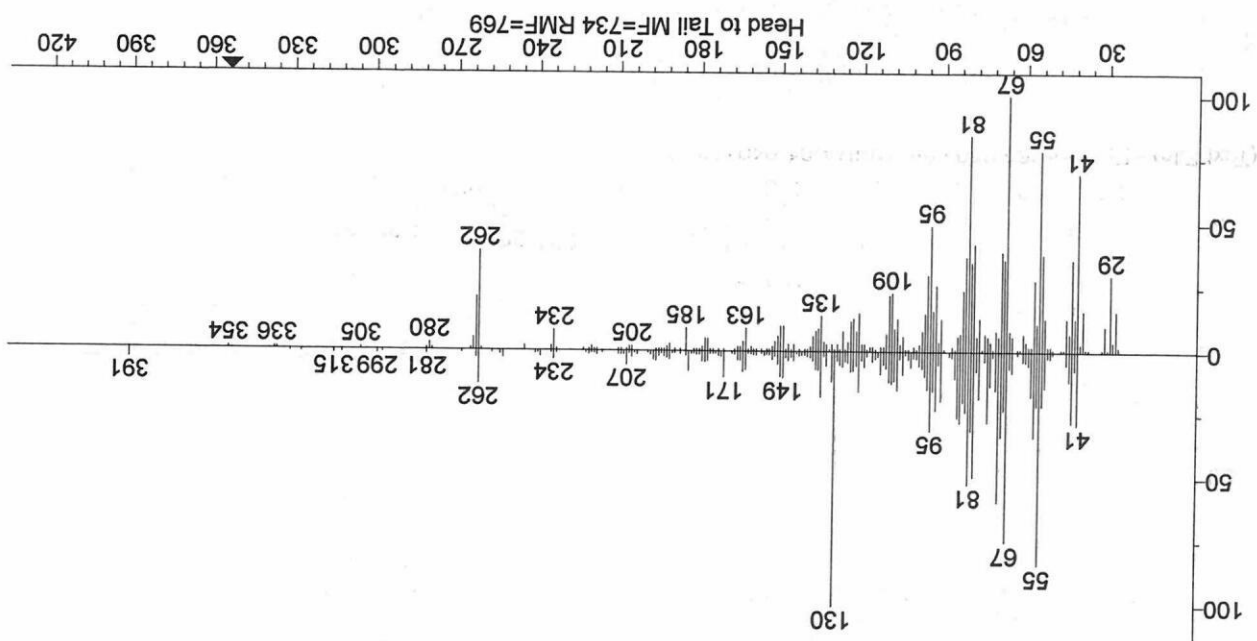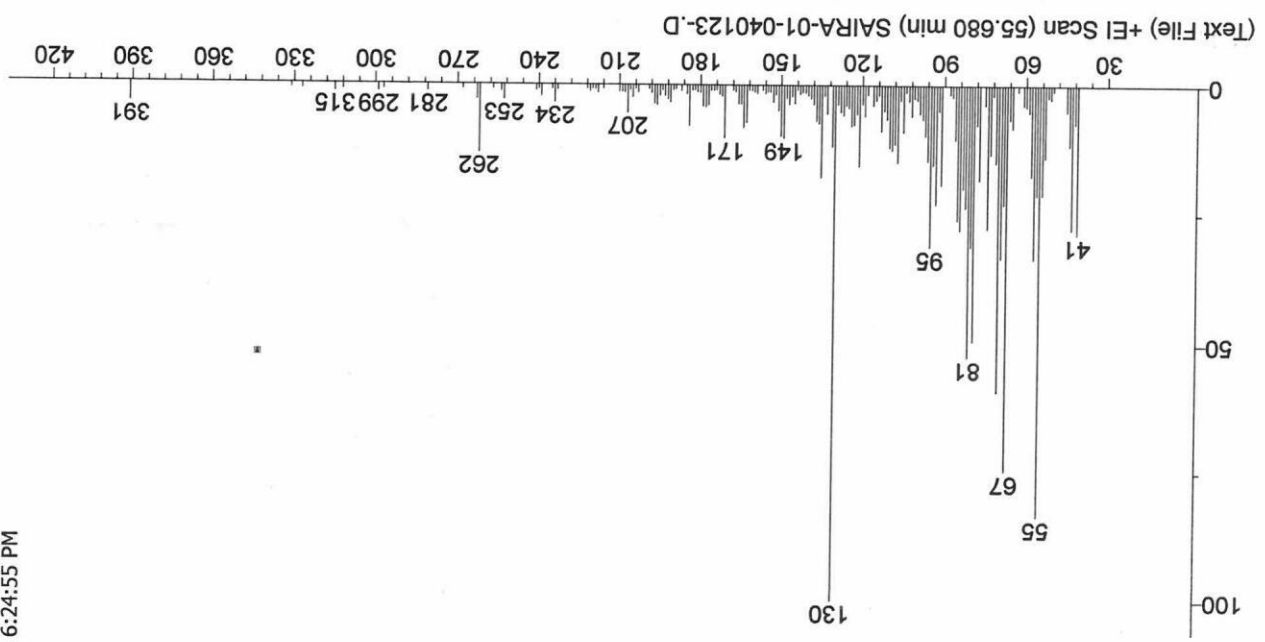

Name: 9,12-Octadecadienoic acid (Z,Z)-, 2-hydroxy-1-(hydroxymethyl)ethyl ester

Formula: C<sub>21</sub>H<sub>38</sub>O<sub>4</sub>

MW: 354 CAS#: 3443-82-1 NIST#: 16013 ID#: 28833 DB: mainlib

Other DBs: None

10 largest peaks:

67 999 | 81 840 | 55 780 | 41 690 | 95 490 | 79 420 | 69 390 | 262 390 | 54 380 | 82 370 |

Synonyms:

1. Linolein, 2-mono-

2.  $\beta$ -Monolinolein

3. 2-Hydroxy-1-(hydroxymethyl)ethyl (9Z,12Z)-9,12-octadecadienoate #

Estimated non-polar retention index (n-alkane scale):

Value: 2713 iu

Confidence interval (Diverse functional groups): 89(50%) 382(95%) iu



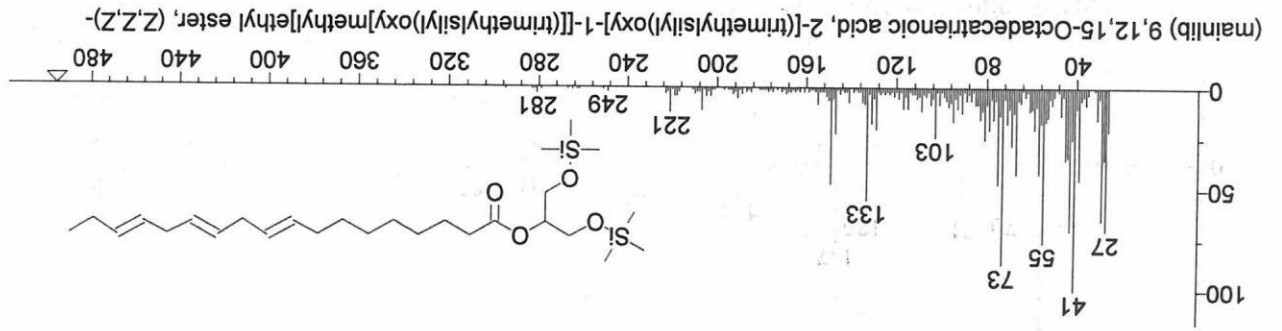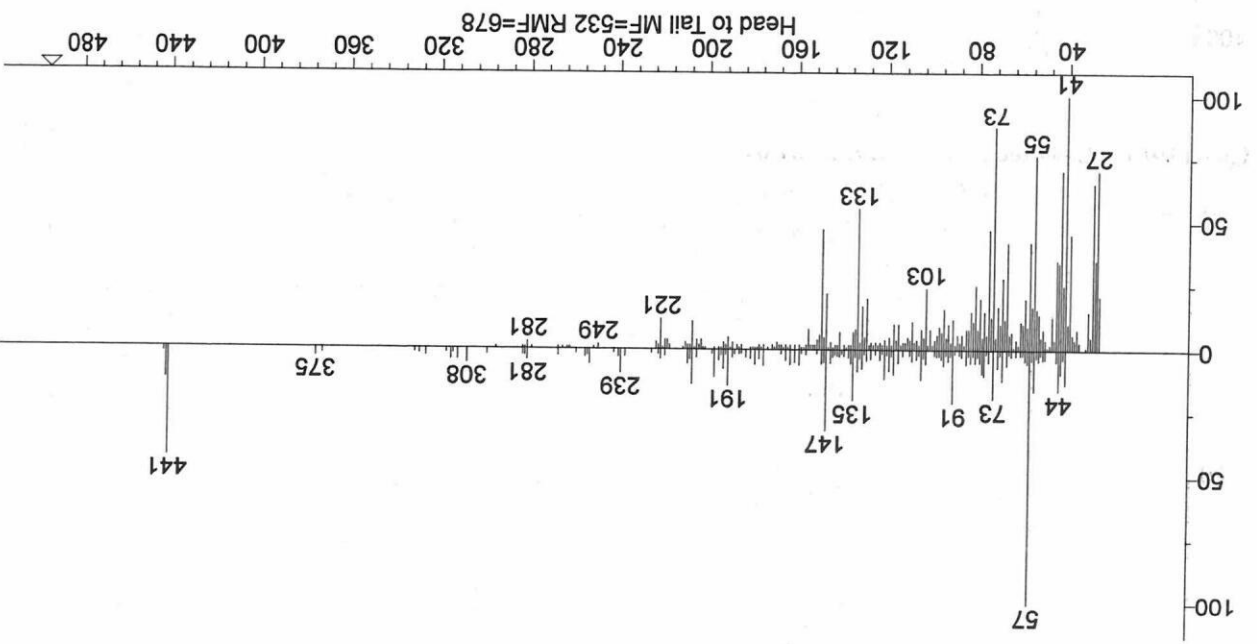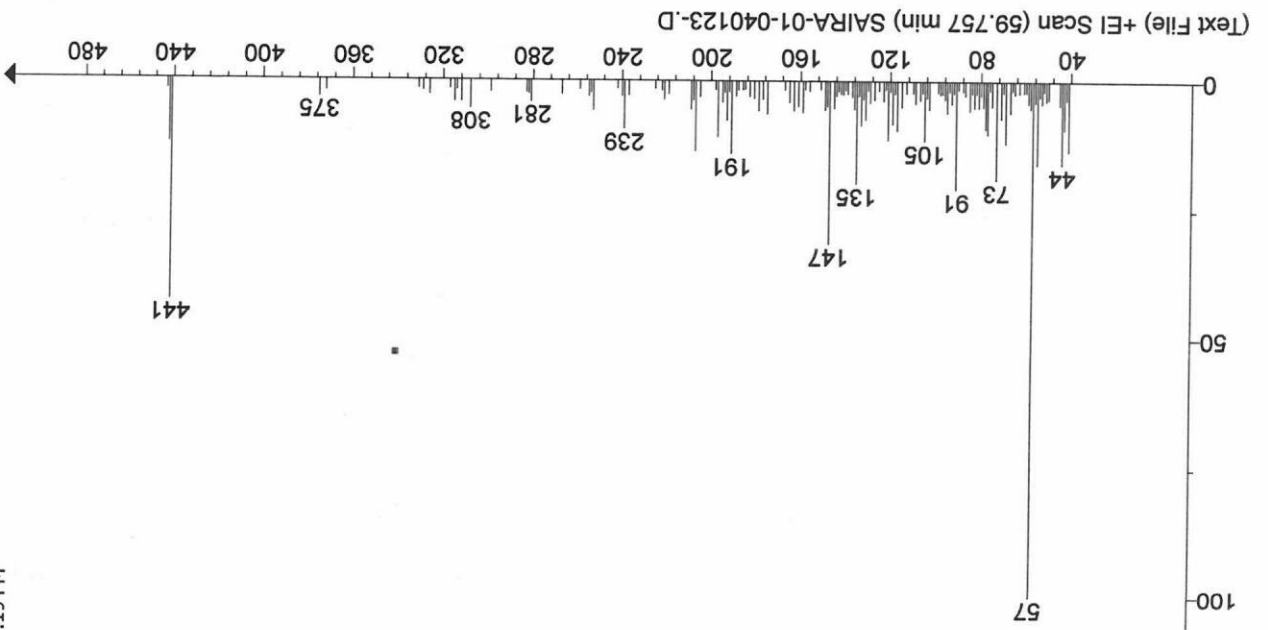

Name: 9,12,15-Octadecatrienoic acid, 2-[(trimethylsilyl)oxy]-1-[[trimethylsilyl]oxy]methyl]ethyl ester, (Z,Z,Z)-

Formula: C<sub>27</sub>H<sub>52</sub>O<sub>4</sub>Si<sub>2</sub>

MW: 496 CAS#: 55521-23-8 NIST#: 18114 ID#: 3312 DB: mainlib

Other DBs: None

10 largest peaks:

41 999 | 73 870 | 55 760 | 27 700 | 43 700 | 29 650 | 133 550 | 75 470 | 149 470 | 39 450 |

Synonyms:

1.2-[(Trimethylsilyl)oxy]-1-[[trimethylsilyl]oxy]methyl]ethyl (9E,12E,15E)-9,12,15-octadecatrienoate #

Estimated non-polar retention index (n-alkane scale):

Value: 2804 iu

Confidence interval (Diverse functional groups): 89(50%) 382(95%) iu

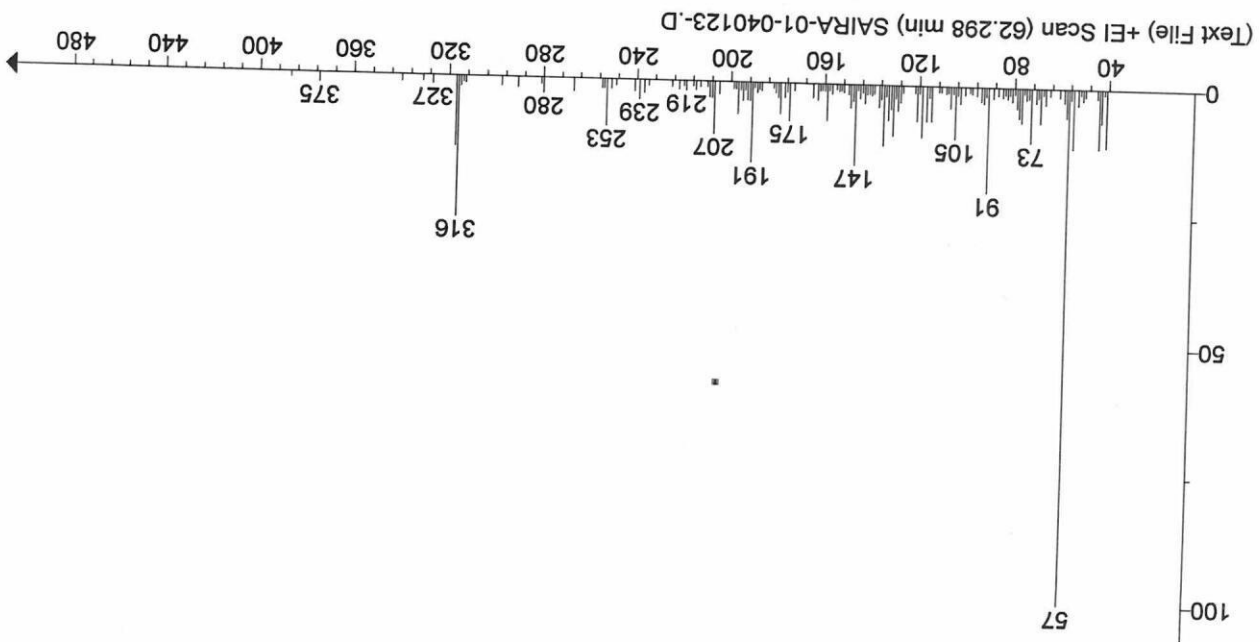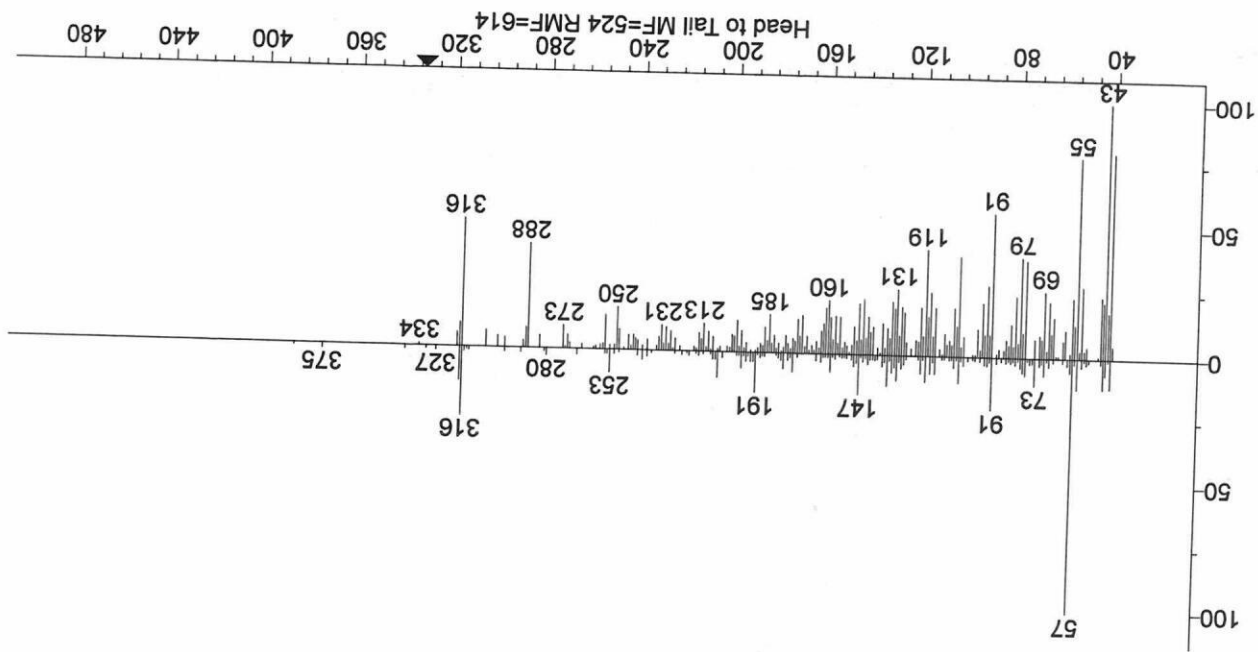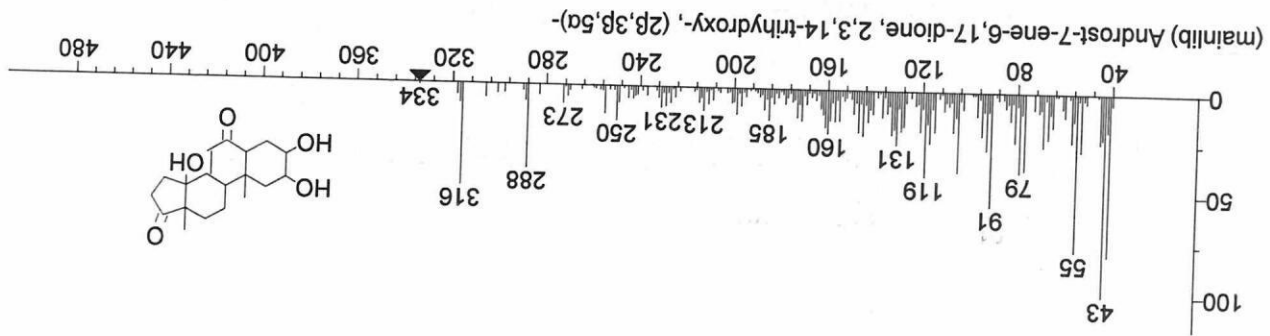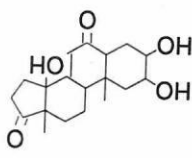

Name: Androst-7-ene-6,17-dione, 2,3,14-trihydroxy-, (2 $\beta$ ,3 $\beta$ ,5 $\alpha$ )-

Formula: C<sub>19</sub>H<sub>26</sub>O<sub>5</sub>

MW: 334 CAS#: 55191-58-7 NIST#: 15527 ID#: 5584 DB: mainlib

Other DBs: None

Contributor: G.SCHULZ SCHERING AG, BERLIN, E.GERMANY.

10 largest peaks:

43 999 | 41 800 | 55 780 | 91 560 | 316 500 | 119 415 | 288 408 | 79 390 | 105 390 | 77 378 |

Synonyms:

1,2,3,14-Trihydroxyandrost-7-ene-6,17-dione #

Estimated non-polar retention index (n-alkane scale):

Value: 2649 iu

Confidence interval (Low reliability): 174(50%) 752(95%) iu
